# Supplementary material for: Naringenin modulates oxidative stress and lipid metabolism: Insights from network pharmacology, mendelian randomization, and molecular docking
Source: Front Pharmacol. 2024 Oct 15;15:1448308. doi: 10.3389/fphar.2024.1448308 (PMC11518751; doi:10.3389/fphar.2024.1448308)
Supplement: Supplementary file 6 [file Table1.xlsx]

## Sheet: Table S1 IV for MR
exposure	Author	samplesize.exposure	SNP	chr.exposure	pos.exposure	effect_allele.exposure	other_allele.exposure	eaf.exposure	beta.exposure	se.exposure	pval.exposure	F_statistics
CGA_CGB	Suhre	1000	rs753307	19	49518484	C	T	0.48	0.26	0.03	9.4e-15	33.75
LPA	Yao	6861	rs41259144	6	161022107	T	C	0.011	-0.5	0.09	2.03e-08	36.91
CXCL2_CXCL3	Pietzner	10708	rs1893319	4	74973129	T	C	0.36	0.09	0.01	5.7e-12	41.01
SGK3	Pietzner	10708	rs142632105	8	67687500	A	G	0.01	0.44	0.06	1.23e-13	41.2
AGT	Suhre	1000	rs2493151	1	230878561	A	G	0.23	0.34	0.05	2.2e-11	41.31
DTYMK	Pietzner	10708	rs148221699	2	242630880	A	C	0.03	-0.26	0.04	2.14e-12	41.31
PGLYRP3	Ferkingstad	35559	rs1865234	1	153315784	T	C	0.101	0.08	0.01	1.58e-10	41.37
ST8SIA6	Ferkingstad	35559	rs45462798	10	17495619	A	T	0.036	-0.13	0.02	1.32e-09	41.65
RECQL	Pietzner	10708	rs74626198	12	21696251	T	C	0.97	0.26	0.04	4.17e-12	41.96
EMR2	Suhre	1000	rs7260110	19	14501544	G	A	0.36	0.3	0.05	5.2e-11	42.28
ABHD10	Pietzner	10708	rs698360	3	111681335	T	C	0.48	0.09	0.01	5.22e-13	42.5
AXIN1	Sun_2	35571	rs11647223	16	361321	T	C	0.472	0.05	0.01	2.56e-12	42.62
LPA	Yao	6861	rs151292106	6	160943149	C	T	0.975	0.36	0.06	2.51e-08	42.88
TGM4	Ferkingstad	35559	rs1995640	3	44943069	T	C	0.411	-0.05	0.01	2.34e-10	43.1
UNC45A	Pietzner	10708	rs7173521	15	91493207	T	C	0.03	-0.26	0.04	1.69e-12	43.6
ACADVL	Ferkingstad	35559	rs507506	17	7118322	A	G	0.442	0.05	0.01	1.15e-09	43.9
CASP3	Suhre	1000	rs870825	4	185588045	G	A	0.16	-0.4	0.06	1.8e-11	43.92
CABLES2	Pietzner	10708	rs2236201	20	60985627	T	C	0.54	-0.09	0.01	3.05e-12	44.23
HADH	Pietzner	10708	rs62311424	4	108925253	T	C	0.94	0.19	0.03	4.3e-13	44.24
LDHA	Pietzner	10708	rs111294128	11	18411722	A	G	0.99	0.46	0.06	2.72e-16	44.46
IGFBP1	Pietzner	10708	rs10577484	7	45915378	A	ATG	0.51	-0.09	0.01	1.04e-12	44.49
IGFBP5	Ferkingstad	35559	rs7598172	2	217677999	G	T	0.499	0.05	0.01	2.51e-10	44.5
TRIP10	Ferkingstad	35559	rs75269317	19	6740167	A	G	0.007	-0.31	0.05	4.79e-10	44.86
EFS	Pietzner	10708	rs10137082	14	23840033	T	C	0.24	-0.11	0.02	1.53e-12	44.9
LZIC	Ferkingstad	35559	rs4265433	1	10125555	A	G	0.022	-0.17	0.03	2.63e-10	45.06
PC	Pietzner	10708	rs543191	11	66583779	T	G	0.61	0.09	0.01	5.14e-12	45.2
CD68	Pietzner	10708	rs9901675	17	7484812	A	G	0.05	-0.21	0.03	4.7e-14	45.47
GPC6	Pietzner	10708	rs1535692	13	95034749	A	G	0.18	-0.12	0.02	1.51e-12	45.7
EFNA3	Ferkingstad	35559	rs67333363	1	155058046	G	A	0.087	-0.09	0.01	2.51e-10	45.77
CXCL13	Sun_2	35571	rs2053526	4	78426029	G	A	0.398	-0.05	0.01	8.03e-11	46.14
GPD1	Pietzner	10708	rs78089413	12	50527585	A	G	0.01	0.47	0.06	3e-13	46.23
KITLG	Sun_2	35571	rs11105121	12	89364586	T	C	0.662	-0.05	0.01	1.48e-11	46.46
CNP	Pietzner	10708	rs11079027	17	40123521	A	G	0.26	-0.11	0.02	5.87e-13	46.49
NUDT5	Pietzner	10708	rs7895525	10	12250620	T	C	0.76	-0.11	0.02	3.28e-12	46.6
INHBA_INHBC	Pietzner	10708	rs3741414	12	57844049	T	C	0.24	-0.11	0.02	8.45e-13	46.6
AKT3	Sun_2	35571	rs4515770	1	243686913	C	T	0.218	0.06	0.01	5.62e-12	46.66
IL33	Sun_2	35571	rs143215670	9	6264551	C	G	0.005	-0.38	0.06	1.83e-11	46.81
CD69	Sun_2	35571	rs12819552	12	9919832	G	A	0.422	-0.05	0.01	8.03e-11	46.98
XCL2	Pietzner	10708	rs10753774	1	168514008	T	C	0.3	0.1	0.01	5.25e-13	46.99
PPFIA1	Pietzner	10708	rs55678639	11	70316391	A	G	0.65	0.1	0.01	3.2e-13	46.99
KIT	Sun_2	35571	rs218263	4	55408104	T	C	0.124	-0.08	0.01	1.33e-12	47.01
DNAJC10	Pietzner	10708	rs72898732	2	183627183	T	C	0.02	-0.33	0.04	3.28e-15	47.02
MYBPC1	Pietzner	10708	rs80087033	12	102048447	A	G	0.15	-0.13	0.02	3.98e-13	47.06
LYAR	Sun_2	35571	rs11723339	4	4271886	T	C	0.621	-0.05	0.01	3.47e-11	47.09
DLD	Pietzner	10708	rs886774	7	107495434	A	G	0.58	0.1	0.01	3.69e-12	47.28
ATOX1	Pietzner	10708	rs2915894	5	151195933	T	C	0.42	-0.1	0.01	2.05e-12	47.28
AK1	Ferkingstad	35559	rs9919018	9	130642755	A	G	0.244	-0.06	0.01	2.04e-10	47.33
EPB41	Pietzner	10708	rs7556059	1	29202162	T	C	0.07	-0.18	0.03	2.45e-13	47.4
RRM2B	Sun_1	3301	rs74589258	8	103215228	G	A	0.07	0.33	0.05	1.1e-11	47.45
PTHLH	Sun_1	3301	rs10843115	12	28307717	T	C	0.271	0.19	0.03	1.4e-11	47.74
SKAP1	Sun_2	35571	rs12603827	17	46327902	T	C	0.454	0.05	0.01	1.1e-13	47.74
DNAJB1	Sun_2	35571	rs11085896	19	14651886	C	A	0.606	-0.05	0.01	3.47e-11	47.77
EVA1C	Sun_1	3301	rs6517101	21	33868483	G	T	0.331	0.18	0.03	5.9e-12	48.03
PSMG3	Sun_2	35571	rs34407549	7	1608812	G	C	0.008	-0.29	0.04	7.03e-12	48.05
ANGPTL2	Sun_2	35571	rs117360431	9	129815495	A	G	0.02	0.18	0.03	1.47e-12	48.2
DAPP1	Pietzner	10708	rs2162386	4	100753152	A	C	0.53	0.1	0.01	5.71e-13	48.35
CCL3L1	Suhre	1000	rs16971895	17	34386399	A	G	0.04	0.78	0.11	1.2e-12	48.39
ECHS1	Ferkingstad	35559	rs10466126	10	135186806	A	G	0.253	0.06	0.01	9.12e-11	48.41
PLD3	Pietzner	10708	rs12151243	19	40862872	T	G	0.15	-0.13	0.02	8.9e-14	48.51
GSTP1	Sun_1	3301	rs1695	11	67352689	G	A	0.345	-0.18	0.03	2.3e-12	49.03
MGAT1	Ferkingstad	35559	rs634501	5	180218668	A	G	0.258	-0.06	0.01	2.82e-12	49.08
PACSIN3	Pietzner	10708	rs61897858	11	47235263	A	T	0.91	-0.17	0.02	1.69e-13	49.13
TBCB	Pietzner	10708	rs2231569	19	36605875	T	G	0.04	0.24	0.04	1.63e-12	49.18
PMM1	Pietzner	10708	rs35117663	22	42091027	A	AAG	0.19	-0.12	0.02	1.6e-12	49.27
RAD1	Ferkingstad	35559	rs2308957	5	34911884	T	C	0.008	-0.29	0.04	2.82e-11	49.3
PTPRJ	Pietzner	10708	rs67277976	11	48275826	A	C	0.98	0.34	0.05	4.36e-14	49.31
SPHK1	Pietzner	10708	rs145998624	17	74319057	C	G	0.01	-0.48	0.06	7.1e-17	49.68
STK4	Sun_2	35571	rs1894572	20	43685510	C	T	0.474	0.05	0.01	3.69e-14	49.89
SDCBP2	Pietzner	10708	rs6109526	20	1323192	T	C	0.66	-0.1	0.01	6.54e-15	50.22
CINP	Ferkingstad	35559	rs3759562	14	102831817	G	A	0.268	-0.06	0.01	4.9e-10	50.25
IFNL1	Sun_2	35571	rs28668750	19	39819802	T	G	0.11	-0.09	0.01	1.41e-12	50.27
ERLEC1	Sun_1	3301	rs58359565	2	53958919	A	C	0.219	-0.21	0.03	2.1e-12	50.53
CSRP1	Pietzner	10708	rs12729389	1	201456799	T	G	0.64	0.1	0.01	2.33e-13	50.56
KLK3	Ferkingstad	35559	rs2659051	19	51345568	C	G	0.178	-0.07	0.01	1.74e-10	51.04
NEO1	Sun_1	3301	rs12903656	15	73326961	C	G	0.101	0.29	0.04	5.5e-12	51.17
NETO1	Ferkingstad	35559	rs7242889	18	71231385	G	C	0.18	0.07	0.01	5.62e-11	51.53
CD74	Sun_2	35571	rs79078220	5	149793650	A	G	0.11	-0.09	0.01	5.36e-15	51.58
FKBP4	Pietzner	10708	rs57120900	12	2905888	A	G	0.96	0.25	0.04	1.21e-12	52.05
TAGLN	Pietzner	10708	rs1871757	11	117030581	A	T	0.83	-0.13	0.02	2.12e-15	52.1
GPC5	Suhre	1000	rs2147190	13	92058888	T	C	0.34	0.33	0.05	2.3e-13	52.6
C2CD2L	Sun_2	35571	rs640603	11	118964330	A	G	0.352	-0.06	0.01	1.04e-12	52.8
SEMA3C	Sun_1	3301	rs1019016	7	80570562	T	G	0.581	0.18	0.02	1.6e-12	52.88
NPPA	Ferkingstad	35559	rs145488887	1	11827796	C	T	0.046	0.13	0.02	4.17e-12	52.93
SLC27A4	Sun_2	35571	rs137948800	9	131069717	TA	T	0.123	0.08	0.01	4.51e-14	52.94
TIRAP	Sun_1	3301	rs111577916	11	126071349	T	G	0.025	-0.57	0.08	1.6e-13	53.09
ADAMTSL2	Pietzner	10708	rs1008250	9	136397834	A	G	0.73	-0.11	0.02	4.47e-12	53.2
DEFB104A_DEFB104B	Sun_1	3301	rs183772362	8	7243016	T	C	0.033	0.5	0.07	2.1e-12	53.49
CIAPIN1	Sun_2	35571	rs686402	16	57486613	T	C	0.528	0.06	0.01	3.93e-15	53.71
PF4	Pietzner	10708	rs11574452	4	74846661	A	C	0.04	-0.26	0.03	6.97e-18	53.73
MTIF3	Pietzner	10708	rs1218825	13	28009920	C	G	0.95	0.23	0.03	2.45e-15	54.07
DUT	Ferkingstad	35559	rs919129	15	48675227	G	A	0.138	-0.08	0.01	1.12e-12	54.22
ERO1LB	Pietzner	10708	rs2463186	1	236437408	C	G	0.63	0.1	0.01	2e-14	54.26
PRKCA	Pietzner	10708	rs35180366	17	64295082	C	CAT	0.39	0.1	0.01	1.38e-14	54.32
IDI1	Pietzner	10708	rs4880760	10	1094909	C	G	0.97	0.3	0.04	4.87e-17	54.87
PLG	Suhre	1000	rs783150	6	161226939	T	C	0.11	-0.52	0.07	8.7e-15	55.11
LRP12	Pietzner	10708	rs2942570	8	105481705	T	C	0.4	-0.1	0.01	9.05e-14	55.87
GCLM	Pietzner	10708	rs12563495	1	94384624	A	G	0.5	-0.1	0.01	7.47e-17	55.98
MSRA	Sun_2	35571	rs12546887	8	10292876	T	C	0.59	-0.06	0.01	1.04e-12	56.01
F2	Pietzner	10708	rs183830453	11	47117406	T	G	0.01	0.51	0.07	8.29e-15	56.3
STX16	Sun_2	35571	rs218476	20	57237670	A	G	0.38	0.06	0.01	4.17e-13	56.48
NAPG	Pietzner	10708	rs489837	18	10485357	T	C	0.55	0.1	0.01	1.87e-15	56.52
GALNT13	Ferkingstad	35559	rs16834610	2	154730495	T	C	0.05	0.13	0.02	1.26e-11	56.64
FSTL3	Pietzner	10708	rs112418024	19	692790	A	G	0.03	-0.3	0.04	1.07e-12	56.75
SOD1	Sun_2	35571	rs7282332	21	33126239	A	G	0.103	0.09	0.01	9.19e-15	56.84
DNAJB12	Pietzner	10708	rs9416018	10	74100642	A	G	0.62	-0.11	0.01	6.08e-15	56.98
FBLN5	Pietzner	10708	rs2402088	14	92388714	A	G	0.43	0.1	0.01	2.54e-14	57.07
DYNLL2	Ferkingstad	35559	rs7225351	17	56155011	G	A	0.335	-0.06	0.01	1.17e-10	57.09
NRTN	Sun_2	35571	rs36055559	19	5799433	A	G	0.172	-0.08	0.01	9.22e-12	57.13
MME	Sun_2	35571	rs79837905	3	154785591	G	A	0.08	-0.11	0.01	6.64e-16	57.55
GZMA	Sun_2	35571	rs2047745	5	54489541	C	T	0.209	0.07	0.01	7.38e-15	57.66
KLRK1	Suhre	1000	rs2255336	12	10532326	T	C	0.22	0.4	0.05	1.3e-13	57.68
FGF7	Sun_1	3301	rs7162172	15	50364841	C	T	0.392	-0.19	0.03	6.8e-13	57.76
MMP13	Pietzner	10708	rs478927	11	102824826	T	C	0.31	0.11	0.02	8.59e-15	57.76
DSG4	Sun_2	35571	rs34620697	18	28983529	T	C	0.006	-0.37	0.05	2.47e-15	57.83
IHH	Pietzner	10708	rs7561119	2	219986253	T	C	0.9	0.17	0.02	6.13e-16	57.99
CCL2	Sun_2	35571	rs12601658	17	32533423	A	T	0.229	-0.07	0.01	1.9e-17	58.1
IRF3	Pietzner	10708	rs10423580	19	50195771	T	G	0.57	0.11	0.01	1.16e-15	58.17
INSL5	Pietzner	10708	rs11809759	1	67269905	A	G	0.61	-0.11	0.01	2.92e-14	58.64
PRXL2A	Sun_1	3301	rs10887868	10	82194264	A	G	0.412	-0.19	0.03	5.5e-14	58.73
IRAK4	Pietzner	10708	rs60813848	12	44120092	T	C	0.07	0.21	0.02	4e-17	58.9
NSF	Pietzner	10708	rs2532240	17	44265839	T	C	0.42	0.11	0.01	1.39e-17	58.93
KRT20	Ferkingstad	35559	rs4796667	17	39678716	T	C	0.359	0.06	0.01	1.7e-12	59.03
SLITRK1	Ferkingstad	35559	rs2876803	13	84368785	A	T	0.153	0.08	0.01	7.41e-14	59.11
PLA2G1B	Sun_2	35571	rs11065078	12	120748585	T	C	0.208	-0.07	0.01	3.05e-15	59.13
CERT	Sun_2	35571	rs10942737	5	74682813	C	T	0.082	0.11	0.01	6.38e-14	59.14
NNMT	Ferkingstad	35559	rs2604277	11	114179102	T	A	0.052	-0.13	0.02	2.45e-12	59.24
ACOT8	Pietzner	10708	rs55931834	20	44472163	T	C	0.43	0.11	0.01	5.17e-16	59.29
RARRES2	Suhre	1000	rs9640161	7	150045910	A	C	0.37	0.35	0.04	3e-16	59.35
FER	Pietzner	10708	rs6880917	5	108080817	T	C	0.34	0.11	0.01	2.34e-16	59.53
PRDX3	Pietzner	10708	rs7894367	10	120950640	A	G	0.68	0.11	0.01	8.35e-17	59.83
LGALSL	Pietzner	10708	rs76392037	2	64568900	A	C	0.94	-0.22	0.03	4.54e-15	59.85
UBXN2B	Ferkingstad	35559	rs7000685	8	58917333	C	G	0.373	-0.06	0.01	2.51e-13	59.98
RAP1GDS1	Pietzner	10708	rs4699632	4	99349327	A	G	0.93	0.21	0.03	3.53e-16	60.06
DPY30	Pietzner	10708	rs115631838	2	32439307	A	G	0.05	0.24	0.03	1.38e-15	60.4
NDE1	Pietzner	10708	rs7206272	16	15726293	A	C	0.77	-0.13	0.02	1.02e-16	60.54
CPZ	Sun_1	3301	rs2631738	4	8479754	G	A	0.519	0.19	0.02	1e-15	60.55
METAP1	Ferkingstad	35559	rs7676259	4	99942649	A	G	0.387	0.06	0.01	4.17e-15	60.84
PVRL4	Ferkingstad	35559	rs34990628	1	161067085	T	C	0.159	-0.08	0.01	2.75e-13	60.96
GALP	Sun_1	3301	rs111265125	19	56688781	C	G	0.022	0.65	0.09	1e-12	61.09
SOST	Sun_2	35571	rs1513671	17	41807310	C	G	0.639	-0.06	0.01	2.93e-18	61.16
MGLL	Sun_2	35571	rs7578	3	127408239	A	G	0.557	0.06	0.01	3.5e-17	61.21
UBE2F	Pietzner	10708	rs6723077	2	238869884	T	C	0.46	0.11	0.01	6.26e-17	61.24
DDX19A	Pietzner	10708	rs61757207	16	70358495	A	G	0.99	0.54	0.06	3.22e-20	61.25
COLEC10	Pietzner	10708	rs72682450	8	120141923	T	G	0.01	-0.54	0.07	1.55e-16	61.48
ACOT13	Pietzner	10708	rs11753290	6	24714433	A	G	0.22	0.13	0.02	6.58e-17	61.5
MMP7	Suhre	1000	rs11568819	11	102401633	A	G	0.07	0.67	0.09	5.8e-14	61.56
PLXDC2	Pietzner	10708	rs12412765	10	20598372	A	T	0.11	-0.17	0.02	1.45e-16	61.65
REG4	Sun_1	3301	rs79795228	1	120359286	A	C	0.015	0.79	0.1	1.4e-15	61.98
MPHOSPH8	Sun_2	35571	rs35424555	13	20221516	G	A	0.123	0.09	0.01	6.38e-14	62.14
MTMR6	Pietzner	10708	rs7999040	13	25823207	A	T	0.83	-0.14	0.02	3.11e-15	62.14
AKR1B1	Sun_1	3301	rs2229542	7	134135621	C	T	0.014	-0.82	0.1	4.7e-15	62.4
COLEC12	Pietzner	10708	rs7243583	18	400766	T	C	0.26	-0.12	0.01	1.33e-17	62.69
SF3B4	Pietzner	10708	rs72692816	1	149902588	A	G	0.92	0.2	0.03	2.74e-15	62.77
FAM20B	Pietzner	10708	rs45499094	1	179057597	A	C	0.08	-0.2	0.02	1.22e-16	62.77
HSF1	Pietzner	10708	rs3757976	8	145536753	A	G	0.5	0.11	0.01	2.98e-17	62.8
CPLX1	Ferkingstad	35559	rs7687101	4	812679	T	G	0.433	0.06	0.01	1.35e-12	62.96
PKP2	Pietzner	10708	rs9919823	12	32974611	T	C	0.97	-0.32	0.04	1.54e-16	62.98
RRM1	Ferkingstad	35559	rs11031142	11	4174375	C	T	0.438	0.06	0.01	1.2e-11	63.14
PDLIM1	Pietzner	10708	rs1328599	10	97053775	T	G	0.92	-0.2	0.03	8.38e-16	63.41
AES	Pietzner	10708	rs11539938	19	3062857	T	C	0.58	0.11	0.02	3.13e-13	63.49
RAB22A	Pietzner	10708	rs12480383	20	56887156	T	C	0.07	0.21	0.02	2.34e-18	63.62
F11R	Sun_2	35571	rs60315407	1	161032805	C	T	0.291	0.07	0.01	1.58e-16	64.04
SEMA6A	Sun_1	3301	rs3733724	5	115779973	T	C	0.097	0.33	0.04	2.1e-14	64.16
IGFBP7	Suhre	1000	rs2412776	4	57951468	G	A	0.19	0.44	0.05	5.5e-17	64.16
C3	Pietzner	10708	rs2230199	19	6718387	C	G	0.21	-0.13	0.02	8.53e-17	64.17
CHAD	Pietzner	10708	rs184613584	17	48508221	A	C	0.99	0.55	0.07	4.16e-15	64.98
BAG3	Sun_2	35571	rs35434411	10	121429394	A	G	0.031	0.17	0.02	1.17e-16	65.42
IL23R	Suhre	1000	rs11209026	1	67705958	A	G	0.06	-0.74	0.09	3.4e-16	66.08
CFI	Suhre	1000	rs7439493	4	110656730	A	G	0.4	0.36	0.04	1.6e-17	66.2
GLRX3	Pietzner	10708	rs12248841	10	131945252	T	C	0.57	0.11	0.01	6.31e-19	66.24
ACTA2	Sun_2	35571	rs5786849	10	90753549	TAA	T	0.498	-0.06	0.01	2.93e-18	66.3
ARPC1B	Pietzner	10708	rs75944999	7	98995724	A	G	0.04	0.28	0.03	3.04e-17	66.73
MTHFS	Sun_1	3301	rs7173566	15	80211691	C	T	0.343	-0.21	0.03	6e-16	66.9
CKM	Sun_1	3301	rs11559024	19	45821183	C	T	0.022	-0.68	0.08	9.1e-16	66.98
ICAM4	Pietzner	10708	rs5030377	19	10393234	A	G	0.62	0.12	0.01	1.89e-16	67.13
PTGDS	Sun_1	3301	rs7019538	9	139861470	C	T	0.524	0.2	0.02	7.8e-16	67.17
CCL4L1	Suhre	1000	rs3213636	17	34475131	A	C	0.19	-0.45	0.06	6.1e-15	67.6
CALCOCO2	Pietzner	10708	rs550510	17	46926615	A	G	0.15	-0.16	0.02	7.92e-17	67.72
TPPP3	Sun_2	35571	rs13334364	16	67332365	C	T	0.075	-0.12	0.01	6.43e-17	68.02
SLC16A1	Sun_2	35571	rs6681552	1	113434265	A	G	0.534	-0.06	0.01	9.19e-15	68.17
RAB1A	Pietzner	10708	rs3052195	2	65313215	C	CAG	0.25	-0.13	0.02	8.54e-18	68.28
AGRP	Suhre	1000	rs7184253	16	67380550	C	T	0.05	0.82	0.09	6.7e-18	68.28
ADM2	Pietzner	10708	rs72438078	22	50921148	A	AACACTCGGGCCCCCGAAG	0.11	0.18	0.02	7.19e-16	68.35
DEFA5	Pietzner	10708	rs7839771	8	6913026	T	C	0.02	-0.4	0.06	1.46e-12	68.6
AGAP2	Pietzner	10708	rs12371356	12	58135420	T	C	0.52	0.11	0.01	9.41e-19	68.68
METTL24	Pietzner	10708	rs12664330	6	110681879	A	G	0.64	0.12	0.01	1.43e-17	69.14
APMAP	Sun_1	3301	rs8125909	20	24975835	C	A	0.132	0.3	0.04	2.8e-16	69.47
DARS	Pietzner	10708	rs2304371	2	136561557	A	G	0.85	-0.16	0.02	8.11e-19	69.47
APOB	Ferkingstad	35559	rs563290	2	21288226	G	A	0.14	-0.09	0.01	2e-13	69.57
FAM172A	Pietzner	10708	rs35107028	5	93051362	A	T	0.13	0.17	0.02	3.32e-18	69.62
CNTN1	Yao	6861	rs11178049	12	41113597	A	T	0.854	0.2	0.04	3.35e-08	69.81
SNCA	Sun_1	3301	rs2245801	4	90757840	C	T	0.788	-0.25	0.03	1.2e-16	70.36
ERN1	Pietzner	10708	rs8076809	17	62181308	A	C	0.75	0.13	0.02	7.46e-19	70.41
THPO	Sun_2	35571	rs6141	3	184090266	T	C	0.532	0.06	0.01	2.26e-19	70.44
HAPLN4	Pietzner	10708	rs55765017	19	19368264	A	G	0.16	0.16	0.02	3.15e-17	70.49
PRPSAP1	Pietzner	10708	rs388283	17	74335069	A	G	0.21	0.14	0.02	1.25e-18	71.09
EGFR	Pietzner	10708	rs12669749	7	55235804	A	C	0.12	0.18	0.02	8.76e-18	71.31
FGFR1	Pietzner	10708	rs62505473	8	38323765	C	G	0.59	-0.12	0.01	1.6e-17	71.38
CXCL10	Suhre	1000	rs11548618	4	76943947	A	G	0.01	1.84	0.19	4.9e-21	71.79
AP2A2	Pietzner	10708	rs117126836	11	948299	A	G	0.09	0.2	0.02	5.5e-20	72.04
NOV	Pietzner	10708	rs34112166	8	120400532	A	G	0.22	0.14	0.02	2.23e-17	72.5
CFL2	Pietzner	10708	rs111787365	14	35177730	A	AT	0.15	0.16	0.02	3.2e-18	73.03
AARS	Pietzner	10708	rs4985404	16	70191068	A	T	0.97	-0.34	0.04	5.38e-16	73.38
HINT1	Sun_1	3301	rs202135714	5	130501795	CT	C	0.225	0.25	0.03	1.6e-16	73.51
PLA2G12B	Pietzner	10708	rs10823949	10	74632924	T	C	0.05	-0.27	0.03	2.14e-17	73.55
BMPER	Pietzner	10708	rs16879245	7	33804485	A	G	0.92	0.22	0.02	3.61e-19	74.03
ENTHD2	Pietzner	10708	rs61745945	17	79205421	A	G	0.01	-0.59	0.06	6.13e-24	74.05
DDX19B	Pietzner	10708	rs61757207	16	70358495	A	G	0.99	0.59	0.06	6.55e-24	74.3
PCBD1	Pietzner	10708	rs55763022	10	72583601	C	G	0.04	-0.3	0.03	3.95e-19	75.02
CGA_FSHB	Pietzner	10708	rs11031006	11	30226528	A	G	0.14	-0.17	0.02	6.8e-31	75.03
MANF	Sun_2	35571	rs11721253	3	51547219	G	A	0.865	0.1	0.01	5.8e-18	75.22
CCDC80	Pietzner	10708	rs6772337	3	112362188	A	G	0.38	0.12	0.01	6.49e-19	75.62
GZMM	Sun_1	3301	rs16989724	19	531115	T	C	0.935	0.43	0.05	3.9e-16	75.85
ENSA	Pietzner	10708	rs111428433	1	150527629	T	C	0.06	0.25	0.03	1.19e-20	76.01
TPM4	Ferkingstad	35559	rs8104011	19	16196764	A	G	0.019	-0.24	0.03	5.01e-17	76.51
TPST1	Sun_1	3301	rs313829	7	65552497	G	A	0.689	0.23	0.03	1.1e-18	76.53
STIM1	Pietzner	10708	rs11030122	11	3887176	C	G	0.7	0.13	0.01	5.75e-20	76.53
IGFBP2	Sun_2	35571	rs4674100	2	217480424	A	G	0.293	-0.07	0.01	2.26e-19	76.57
RNASE1	Sun_1	3301	rs17254387	14	21280678	A	G	0.688	0.23	0.03	3e-17	76.66
MAD1L1	Pietzner	10708	rs1639916	7	2258899	A	G	0.65	0.13	0.01	4.4e-19	76.66
VAV1	Ferkingstad	35559	rs36097961	19	6850767	T	C	0.099	-0.11	0.01	1.41e-16	76.71
TMEM106A	Pietzner	10708	rs2236762	17	41226675	A	T	0.66	0.13	0.01	6.94e-20	76.83
HEXIM2	Pietzner	10708	rs112981250	17	43223316	C	CAT	0.68	-0.13	0.01	3.18e-22	76.89
COL6A3	Pietzner	10708	rs2029998	2	238220307	A	G	0.67	0.13	0.01	3.85e-19	76.91
CEP43	Sun_2	35571	rs2237276	6	167442115	T	C	0.455	0.07	0.01	4.16e-21	77.01
YEATS4	Pietzner	10708	rs11443013	12	69787291	G	GA	0.54	0.12	0.01	6.41e-20	77.14
REN	Sun_1	3301	rs193280350	1	204148649	A	G	0.008	1.2	0.15	1.3e-15	77.16
CA13	Suhre	1000	rs17741049	8	86198253	T	C	0.07	-0.74	0.08	7.9e-20	77.51
CCM2	Pietzner	10708	rs7805382	7	45031315	T	C	0.22	0.15	0.02	1.4e-21	77.81
SELE	Pietzner	10708	rs2205850	1	169691439	A	G	0.65	-0.13	0.01	8.54e-20	77.9
P4HB	Sun_2	35571	rs113708033	17	79835930	T	G	0.192	0.08	0.01	1.03e-20	78.07
IL22RA2	Pietzner	10708	rs2234711	6	137540520	A	G	0.62	-0.12	0.01	1.24e-19	78.13
HFE2	Pietzner	10708	rs113404160	1	145477223	A	G	0.01	-0.61	0.06	1.09e-22	78.16
GP5	Yao	6861	rs1466733	3	194120998	A	G	0.737	0.17	0.02	8.6e-17	78.64
FAM20A	Sun_1	3301	rs929477	17	66655816	A	G	0.094	-0.37	0.04	5.1e-19	78.76
GUCA2B	Pietzner	10708	rs1047047	1	42619139	A	G	0.84	-0.17	0.02	4.07e-19	78.92
LANCL1	Pietzner	10708	rs3856349	2	211346051	T	C	0.49	-0.12	0.01	4.98e-22	78.92
COL6A3	Pietzner	10708	rs2646260	2	238277795	A	G	0.75	0.14	0.02	5.88e-19	79.27
HOMER2	Ferkingstad	35559	rs1256430	15	83519472	A	G	0.165	-0.09	0.01	3.39e-16	79.35
OLFM1	Pietzner	10708	rs10858334	9	137989785	C	G	0.86	-0.18	0.02	1.63e-20	79.54
RILP	Sun_2	35571	rs183827902	17	1552519	T	C	0.017	0.26	0.03	4.37e-20	79.6
DFFA	Sun_2	35571	rs183281838	1	10038213	T	G	0.003	-0.64	0.08	8.28e-16	79.62
PTN	Sun_1	3301	rs1431093	7	137016297	A	C	0.419	0.22	0.02	7.9e-19	79.62
TMEM132C	Sun_1	3301	rs11059617	12	128757909	T	A	0.335	-0.23	0.03	2.2e-18	79.63
ENPP6	Pietzner	10708	rs78293932	4	185139101	T	C	0.03	0.36	0.04	8.39e-17	80.01
CXCL14	Sun_2	35571	rs2078404	5	134958865	A	G	0.357	-0.07	0.01	1.52e-23	80.15
HSPC159	Ferkingstad	35559	rs78459351	2	64593459	A	G	0.046	0.16	0.02	3.47e-17	80.24
S100A4	Sun_1	3301	rs58056804	1	153524706	A	G	0.05	0.5	0.06	4.5e-19	80.26
IL17B	Pietzner	10708	rs6862301	5	148783690	A	C	0.31	0.13	0.02	2.18e-19	80.4
REXO2	Pietzner	10708	rs17116987	11	114301927	T	C	0.85	0.17	0.02	8.6e-24	80.43
CAPN1_CAPNS1	Suhre	1000	rs10895987	11	64904908	T	C	0.23	-0.46	0.05	1e-18	80.48
NEK7	Pietzner	10708	rs142662761	1	198010781	A	G	0.99	0.62	0.06	3.17e-22	80.78
ALDH6A1	Pietzner	10708	rs190138735	14	74379073	A	G	0.01	-0.62	0.06	6.12e-26	80.78
ISCU	Pietzner	10708	rs17040770	12	108955106	C	CT	0.13	0.18	0.02	1.12e-22	80.82
RGMB	Sun_1	3301	rs1563317	5	97768486	G	A	0.553	0.22	0.02	1.2e-18	80.87
PPA1	Suhre	1000	rs10823500	10	72005190	G	A	0.37	0.4	0.05	1.5e-18	80.88
PROS1	Pietzner	10708	rs9290378	3	93580976	T	G	0.41	-0.13	0.01	2.3e-19	81.55
BTNL9	Pietzner	10708	rs138692142	5	180349778	T	C	0.01	-0.62	0.07	5.43e-17	81.58
BID	Sun_2	35571	rs183393610	22	18252442	A	G	0.007	-0.4	0.05	8.27e-18	82.04
COL15A1	Sun_1	3301	rs41305481	9	101767385	G	A	0.302	0.24	0.03	1.9e-19	82.11
RBP2	Sun_2	35571	rs295469	3	139212900	A	G	0.379	-0.07	0.01	2.13e-18	82.2
TEPSIN	Sun_1	3301	rs61745945	17	79205421	A	G	0.016	-0.88	0.1	5.9e-19	82.45
PLEK	Pietzner	10708	rs1867312	2	68619981	A	C	0.57	0.13	0.01	3.25e-21	82.63
LEP	Folkersen	30000	rs12537573	7	127898800	A	G	0.61	-0.08	0.01	5.03e-09	82.67
PDGFRA	Pietzner	10708	rs2307050	4	55141293	A	G	0.11	-0.2	0.02	6.33e-21	82.82
GFER	Sun_2	35571	rs61516948	16	2023322	T	C	0.126	-0.1	0.01	7.7e-21	83.14
APP	Sun_2	35571	rs8131895	21	27503527	A	C	0.654	-0.07	0.01	2.26e-19	83.63
CA10	Sun_1	3301	rs117399000	17	50213731	A	G	0.037	-0.59	0.07	3e-19	83.92
MGAT4C	Pietzner	10708	rs17855890	12	86373221	C	G	0.1	0.21	0.02	5.49e-21	84.03
TIGIT	Ferkingstad	35559	rs73238029	3	114014080	C	A	0.244	0.08	0.01	6.61e-20	84.2
EPO	Ferkingstad	35559	rs221790	7	100278282	G	C	0.41	-0.07	0.01	8.13e-17	84.52
PDCD6IP	Pietzner	10708	rs9876986	3	33841065	A	G	0.73	0.14	0.01	1.5e-24	84.57
ERP44	Sun_2	35571	rs188976415	9	102924058	A	C	0.004	-0.58	0.06	7.99e-22	84.86
EPHA10	Pietzner	10708	rs12074120	1	38197401	T	G	0.7	-0.14	0.02	5.83e-20	85.07
NIT2	Pietzner	10708	rs13073252	3	100094208	T	C	0.31	-0.14	0.01	1.54e-23	85.39
CASS4	Pietzner	10708	rs67041321	20	54988172	T	G	0.9	0.21	0.02	7.39e-23	85.66
CXCL12	Pietzner	10708	rs1023264	10	44893756	T	C	0.66	-0.13	0.01	2.05e-21	85.67
PIANP	Sun_1	3301	rs11064321	12	6809896	C	G	0.397	0.23	0.03	5e-17	85.73
GFRA2	Suhre	1000	rs4443656	8	21541084	G	A	0.42	0.4	0.04	2.2e-19	85.75
PSG9	Sun_1	3301	rs35143187	19	43711272	C	CT	0.673	0.24	0.03	1.1e-15	85.81
PTPRM	Sun_2	35571	rs72911294	18	8253602	T	C	0.272	-0.08	0.01	1.84e-22	85.85
MITD1	Sun_2	35571	rs13009147	2	99803998	G	T	0.652	-0.07	0.01	7.17e-20	86.2
COL4A3BP	Pietzner	10708	rs9791146	5	74740950	T	C	0.09	0.22	0.02	5.98e-23	86.34
GPCPD1	Pietzner	10708	rs6085222	20	5573659	A	G	0.54	0.13	0.01	1.98e-22	86.48
CD200	Pietzner	10708	rs6774405	3	112065028	T	C	0.1	-0.21	0.02	3.95e-20	86.49
ITGA2	Pietzner	10708	rs7035	5	52252191	T	C	0.32	0.14	0.02	4.11e-19	86.88
MAPK13	Sun_1	3301	rs12210904	6	36098191	A	C	0.289	0.25	0.03	1.5e-21	86.97
MTHFD2	Pietzner	10708	rs12469365	2	74416240	A	G	0.49	-0.13	0.01	1.08e-23	87.01
MSTN	Sun_2	35571	rs143242500	2	190924861	G	A	0.002	0.78	0.09	9.63e-20	87.04
ARSK	Pietzner	10708	rs17084933	5	94942780	T	C	0.96	0.33	0.03	1.74e-22	87.56
MXRA8	Pietzner	10708	rs307348	1	1261824	C	G	0.93	0.25	0.03	1.36e-20	87.83
ACOX1	Sun_2	35571	rs10852766	17	73951864	C	T	0.658	0.07	0.01	2.24e-20	87.84
TEK	Suhre	1000	rs35030851	9	27197486	T	G	0.05	0.92	0.1	4.1e-21	88.09
CRADD	Sun_2	35571	rs56944668	12	94243853	T	C	0.157	-0.1	0.01	3.01e-22	88.76
ADGRG1	Sun_2	35571	rs733464	16	57682275	T	C	0.407	0.07	0.01	8.17e-25	89.21
TK2	Pietzner	10708	rs72790432	16	66635531	A	G	0.92	-0.24	0.02	5.16e-23	89.26
C1QTNF5	Sun_1	3301	rs2248863	11	119207341	A	G	0.142	0.33	0.03	3.5e-21	89.93
IL9	Pietzner	10708	rs6596287	5	135479348	A	C	0.7	-0.14	0.02	1.9e-21	90.15
LGR4	Pietzner	10708	rs79076592	11	27391525	T	C	0.99	-0.65	0.06	1.24e-28	90.6
TES	Pietzner	10708	rs13223583	7	115851487	T	C	0.43	-0.13	0.01	1.98e-24	90.83
A2M	Pietzner	10708	rs226384	12	9263647	T	C	0.35	-0.14	0.01	7.14e-27	90.86
KIAA2013	Pietzner	10708	rs926270	1	11969786	T	G	0.51	-0.13	0.01	7.03e-22	91.2
PAG1	Sun_2	35571	rs4436084	8	82038006	C	T	0.35	-0.08	0.01	6.92e-21	91.24
PAPPA	Folkersen	30000	rs17372936	9	119066203	T	C	0.78	0.09	0.01	4.8e-13	91.25
MMP9	Ferkingstad	35559	rs2250889	20	44642406	G	C	0.047	0.17	0.02	1.07e-16	91.54
BAIAP2	Sun_2	35571	rs9989483	17	78971536	T	C	0.173	0.1	0.01	2.1e-21	91.97
HMOX1	Sun_2	35571	rs2071747	22	35777185	C	G	0.059	-0.15	0.02	1.98e-24	92.1
APRT	Sun_2	35571	rs111433410	16	88869195	T	C	0.01	-0.37	0.04	4.55e-22	92.28
EPHA4	Pietzner	10708	rs13420556	2	222387948	A	C	0.48	-0.13	0.01	1.75e-23	92.51
PNLIPRP1	Pietzner	10708	rs2915762	10	118358659	T	C	0.51	0.13	0.01	4.89e-22	92.62
ARG2	Pietzner	10708	rs61990120	14	68089420	A	G	0.14	0.19	0.02	5.26e-21	92.89
CCNH	Pietzner	10708	rs62368956	5	86735368	A	G	0.2	-0.16	0.02	5.37e-23	92.94
MYDGF	Pietzner	10708	rs75029446	19	4701727	T	C	0.02	-0.47	0.05	3.02e-24	93.52
SCAMP3	Sun_2	35571	rs1142287	1	155230131	T	C	0.257	-0.08	0.01	3.22e-25	93.9
FASLG	Sun_2	35571	rs79419452	1	172672473	A	T	0.156	-0.1	0.01	1.11e-28	94.01
ARFIP1	Sun_1	3301	rs4619875	4	153701130	T	C	0.404	0.24	0.02	6.6e-22	94.12
IDO1	Sun_1	3301	rs7010461	8	39781444	T	C	0.334	0.25	0.03	2.5e-20	94.35
RBP1	Ferkingstad	35559	rs2071387	3	139257603	G	A	0.206	0.09	0.01	1.15e-20	94.36
ZYX	Ferkingstad	35559	rs12539742	7	143187097	A	G	0.293	0.08	0.01	8.51e-19	94.57
RBP4	Pietzner	10708	rs36014035	10	95360027	A	C	0.62	0.14	0.01	7.85e-24	95.53
LDLRAP1	Pietzner	10708	rs75446219	1	25877492	T	C	0.03	0.39	0.04	3.85e-24	95.62
PTPRF	Sun_2	35571	rs2842194	1	44028962	A	G	0.225	-0.09	0.01	1.4e-22	96.32
ENDOU	Pietzner	10708	rs11168216	12	48132176	T	C	0.7	-0.15	0.02	4.84e-23	96.71
LRRN1	Sun_1	3301	rs6801789	3	3807592	C	T	0.354	0.25	0.03	2.3e-22	97.08
RABGAP1L	Sun_2	35571	rs6661868	1	174076767	G	A	0.201	0.09	0.01	1.58e-24	97.11
FAM162A	Pietzner	10708	rs7615673	3	122125544	C	G	0.16	-0.18	0.02	1.01e-27	97.25
SPHK2	Pietzner	10708	rs386243	19	49127490	T	C	0.25	0.16	0.02	3.47e-23	97.33
MMP19	Pietzner	10708	rs7296597	12	56241955	A	G	0.06	-0.28	0.03	1.48e-22	97.6
CC2D1A	Sun_2	35571	rs61740117	19	14024269	T	C	0.014	-0.32	0.03	3.98e-25	97.89
WFDC2	Sun_2	35571	rs973446	20	44094375	G	C	0.078	-0.14	0.01	2.53e-26	98.04
CAT	Suhre	1000	rs2284367	11	34484542	C	T	0.22	-0.51	0.05	4.1e-25	98.24
VAMP5	Sun_2	35571	rs6547623	2	85801964	A	T	0.3	0.08	0.01	4.28e-24	98.25
IL12RB2	Sun_1	3301	rs12566098	1	67889571	G	C	0.688	0.26	0.03	6e-22	98.6
HTRA1	Pietzner	10708	rs76579910	10	124202034	T	G	0.06	-0.29	0.03	1.07e-26	99
PTPRU	Pietzner	10708	rs3835409	1	29633491	T	TCAGCC	0.68	0.15	0.01	3.29e-24	100.25
KLC1	Pietzner	10708	rs142008283	14	104121939	A	ATTTTAT	0.33	0.15	0.01	8.04e-27	100.47
LMAN2L	Sun_1	3301	rs2271893	2	97405440	A	G	0.323	0.26	0.03	4.4e-24	100.5
PGM1	Sun_1	3301	rs1126728	1	64097432	T	C	0.228	0.29	0.03	2.8e-23	100.65
NUCB1	Pietzner	10708	rs113587416	19	49402593	G	GA	0.12	-0.21	0.02	1.95e-23	100.65
B3GALT6	Pietzner	10708	rs113272753	1	1164749	G	GC	0.86	0.2	0.02	7.96e-22	100.99
CYB5A	Pietzner	10708	rs36049221	18	71971217	C	CT	0.34	-0.15	0.01	6.42e-24	101.98
PDE3A	Pietzner	10708	rs954865	12	20834162	A	G	0.34	0.15	0.01	1.23e-26	101.98
AKR1C1	Sun_1	3301	rs145648894	10	5009739	G	T	0.111	0.39	0.04	3.8e-23	102.09
PRPSAP2	Pietzner	10708	rs11078421	17	18804385	T	C	0.54	-0.14	0.01	7.17e-27	102.26
SCGB3A1	Pietzner	10708	rs307802	5	180019237	T	C	0.59	-0.14	0.01	1.19e-24	102.49
ENTPD1	Pietzner	10708	rs11598475	10	97621266	A	G	0.34	0.15	0.01	3.65e-27	103.41
CHST15	Pietzner	10708	rs9422302	10	125865777	T	G	0.26	-0.16	0.02	1.21e-24	103.84
F11	Suhre	1000	rs2289252	4	187207381	T	C	0.41	0.44	0.04	4.6e-25	104.17
TAGLN2	Pietzner	10708	rs2789422	1	159892088	A	G	0.42	-0.14	0.01	1.9e-25	104.71
HSD17B14	Pietzner	10708	rs35299026	19	49318380	A	G	0.05	-0.32	0.03	4.48e-23	105.17
ITGB5	Sun_2	35571	rs144195265	3	124509367	A	G	0.031	0.22	0.02	2.43e-26	105.25
VIM	Pietzner	10708	rs796667	10	16946819	T	G	0.62	-0.14	0.01	4.5e-28	105.64
VTCN1	Sun_2	35571	rs56174814	1	117723307	A	T	0.156	0.11	0.01	5.61e-22	105.72
CD63	Sun_2	35571	rs187372065	12	56191879	G	C	0.003	-0.72	0.08	1.34e-21	105.77
POLM	Pietzner	10708	rs142059440	7	44113855	C	G	0.01	0.7	0.06	2.02e-32	106.1
LMNB1	Sun_1	3301	rs36105360	5	126161690	T	C	0.025	0.8	0.08	2.2e-24	106.24
NFKB1	Pietzner	10708	rs62328536	4	103399049	A	C	0.34	0.15	0.01	1.71e-28	106.29
GBP1	Pietzner	10708	rs12089335	1	89530425	T	C	0.3	-0.15	0.01	3.98e-26	106.3
OLFM3	Pietzner	10708	rs1938364	1	102667388	A	G	0.23	-0.17	0.02	3.38e-25	106.81
C9	Pietzner	10708	rs696766	5	39356126	A	G	0.06	0.3	0.03	1.04e-25	106.86
APOC3	Pietzner	10708	rs964184	11	116648917	C	G	0.87	-0.21	0.02	8.39e-27	107.87
APCS	Sun_1	3301	rs71632673	1	159536213	A	C	0.023	-0.84	0.08	1.9e-24	108.04
LCN1	Pietzner	10708	rs11103042	9	138404116	A	G	0.15	-0.2	0.02	1.95e-26	108.11
NLGN2	Pietzner	10708	rs114576150	17	7307950	T	G	0.9	0.24	0.02	1.99e-26	108.42
ITLN1	Pietzner	10708	rs7532133	1	160851534	A	G	0.32	0.15	0.01	1.04e-28	108.74
EGLN1	Pietzner	10708	rs1339891	1	231556395	T	C	0.13	0.21	0.02	8.62e-27	108.91
PLA2G7	Pietzner	10708	rs9472831	6	46689847	A	G	0.5	-0.14	0.01	4.46e-26	109.04
ALDH1A1	Sun_2	35571	rs348452	9	75553385	T	C	0.271	0.09	0.01	3.82e-28	109.14
FAM151A	Sun_1	3301	rs11206397	1	55097068	T	A	0.327	0.27	0.03	2.6e-24	109.36
IL18RAP	Suhre	1000	rs6543140	2	103074274	T	G	0.3	0.49	0.05	1e-24	109.41
FMOD	Pietzner	10708	rs16851364	1	203318144	A	G	0.12	-0.22	0.02	1.47e-29	109.55
CAMP	Ferkingstad	35559	rs55771110	3	47346717	A	G	0.149	0.11	0.01	1.32e-21	109.69
NTRK2	Sun_2	35571	rs77562929	9	87285367	T	G	0.007	0.47	0.05	3.24e-24	109.71
HCLS1	Sun_2	35571	rs3732410	3	121415720	C	T	0.225	0.09	0.01	1.55e-25	109.98
PPIE	Suhre	1000	rs9787249	1	40212878	A	G	0.38	-0.46	0.05	8.9e-24	110.53
LDHC	Pietzner	10708	rs2643858	11	18462494	A	T	0.88	-0.22	0.02	4.08e-26	110.57
GSR	Pietzner	10708	rs4733505	8	30553430	A	G	0.35	-0.15	0.01	1.02e-26	110.74
PMEL	Pietzner	10708	rs2069398	12	56360876	A	G	0.08	0.26	0.03	5.46e-27	110.97
SYK	Pietzner	10708	rs34221447	9	93563884	T	C	0.22	-0.17	0.02	6.02e-29	111.11
CXCL8	Sun_2	35571	rs74468557	4	74591403	A	G	0.055	-0.17	0.02	1.52e-27	111.33
APOA4	Pietzner	10708	rs12721043	11	116692293	A	C	0.01	-0.72	0.07	2.08e-26	111.34
CFD	Pietzner	10708	rs71335276	19	859368	T	G	0.24	-0.17	0.02	4.48e-24	111.38
GAS1	Ferkingstad	35559	rs4878043	9	89687854	C	T	0.423	-0.08	0.01	7.24e-24	111.41
CKMT2	Pietzner	10708	rs114173713	5	80562348	T	C	0.98	-0.51	0.05	4.05e-29	111.6
NSFL1C	Sun_2	35571	rs6033860	20	1448575	G	A	0.283	-0.09	0.01	3.82e-28	112.21
RFESD	Sun_1	3301	rs77881626	5	95017852	G	T	0.048	-0.6	0.06	2.1e-25	112.23
CHRDL2	Sun_1	3301	rs11607100	11	74414919	T	C	0.042	-0.64	0.06	5.8e-26	112.45
UPP1	Pietzner	10708	rs6463455	7	47987296	A	G	0.21	0.18	0.02	1.06e-29	112.46
OAS1	Sun_1	3301	rs4767027	12	113359157	C	T	0.654	-0.27	0.03	6.2e-26	112.55
SCUBE1	Pietzner	10708	rs2744874	22	43715862	T	C	0.86	-0.21	0.02	3.28e-33	112.71
GLYAT	Pietzner	10708	rs2186414	11	58530764	A	C	0.18	-0.19	0.02	7.44e-27	112.88
PARVA	Pietzner	10708	rs4757383	11	12371909	A	T	0.91	-0.25	0.02	4.37e-28	113.44
FGA_FGB_FGG	Pietzner	10708	rs2227426	4	155493171	A	G	0.18	0.19	0.02	2.04e-28	114.1
SPRY2	Sun_2	35571	rs504122	13	80911525	A	G	0.369	-0.08	0.01	3.22e-25	114.53
PPID	Suhre	1000	rs8396	4	159630817	C	T	0.29	0.5	0.05	3.4e-26	115.05
MLYCD	Pietzner	10708	rs9931691	16	83936496	T	C	0.82	0.19	0.02	1.2e-31	115.32
S100A2	Pietzner	10708	rs55955983	1	153526349	T	G	0.95	0.34	0.03	2.55e-28	115.37
GCDH	Pietzner	10708	rs8012	19	13010520	A	G	0.45	-0.15	0.01	6.71e-31	115.75
NBN	Sun_2	35571	rs74378230	8	91043364	G	A	0.004	-0.61	0.06	1.21e-26	115.95
F5	Suhre	1000	rs6033	1	169521853	G	A	0.08	-0.85	0.08	5.5e-25	117.21
PCDH1	Sun_2	35571	rs4645358	5	141260085	T	C	0.575	0.08	0.01	1.08e-31	117.29
VOPP1	Ferkingstad	35559	rs117042408	7	55623391	A	G	0.02	-0.29	0.03	4.27e-23	117.61
HHIP	Pietzner	10708	rs11727676	4	145659064	T	C	0.9	-0.25	0.02	2.48e-26	117.9
SNX9	Sun_2	35571	rs688167	6	158092648	G	C	0.714	-0.09	0.01	2.32e-29	118.11
ASL	Pietzner	10708	rs4145009	7	65726615	T	C	0.37	-0.15	0.01	2.21e-31	118.13
FABP4	Folkersen	30000	rs77878271	8	82395535	A	G	0.97	0.26	0.04	1.1e-13	118.49
MTPAP	Pietzner	10708	rs2254706	10	30628478	T	C	0.72	0.17	0.02	4.87e-28	118.83
VCAM1	Sun_2	35571	rs139561173	1	101145190	C	A	0.211	-0.1	0.01	1.11e-28	118.87
CX3CL1	Pietzner	10708	rs62037103	16	57434140	A	G	0.01	0.75	0.07	2.55e-27	118.96
FCGR3B	Suhre	1000	rs10919544	1	161508763	C	T	0.38	0.48	0.04	3.5e-28	119.85
BDNF	Ferkingstad	35559	rs10501089	11	27788859	T	C	0.071	0.16	0.02	6.17e-24	119.86
CHST4	Pietzner	10708	rs58134724	16	71526091	T	C	0.29	0.16	0.02	1.2e-28	119.91
HAPLN1	Pietzner	10708	rs975595	5	83010095	A	G	0.75	0.17	0.02	4.41e-28	120.1
LY96	Sun_2	35571	rs6472812	8	74917084	G	A	0.956	-0.2	0.02	5.94e-29	120.25
CDC27	Sun_2	35571	rs56287938	17	45297913	G	C	0.102	0.14	0.01	8.97e-30	120.4
TPSB2	Suhre	1000	rs4984778	16	1297516	C	G	0.28	0.52	0.05	2.7e-27	120.55
TEC	Pietzner	10708	rs6845258	4	48181697	A	G	0.41	0.15	0.01	4.22e-32	121.02
OLFML3	Ferkingstad	35559	rs4381184	1	114489769	A	C	0.299	-0.09	0.01	1.38e-24	121.08
PTX3	Folkersen	30000	rs9859018	3	157204598	A	G	0.28	0.1	0.01	9.14e-13	121.44
ELOA	Sun_2	35571	rs2473378	1	24050735	A	G	0.593	0.08	0.01	3.55e-33	121.52
PDK1	Suhre	1000	rs12052479	2	173404804	A	C	0.21	-0.57	0.05	2.5e-28	121.54
IPCEF1	Sun_2	35571	rs2499649	6	154675915	C	T	0.313	-0.09	0.01	9.48e-29	121.54
ORM1	Yao	6861	rs7040440	9	117091074	C	T	0.922	-0.35	0.05	3.3e-14	121.59
POSTN	Sun_1	3301	rs117103342	13	38156538	T	C	0.008	-1.5	0.14	1.6e-28	122.18
TINAGL1	Sun_2	35571	rs945214	1	32047305	G	A	0.613	-0.09	0.01	2.28e-26	122.31
RAB21	Ferkingstad	35559	rs61754230	12	72179446	T	C	0.016	-0.33	0.03	3.24e-25	122.35
GSN	Pietzner	10708	rs10985196	9	124033044	A	C	0.21	-0.19	0.02	3.49e-32	122.97
FH	Pietzner	10708	rs12071124	1	241683705	A	C	0.72	0.17	0.02	2.67e-30	123.24
NUDT9	Sun_1	3301	rs28696943	4	88310135	G	A	0.167	-0.36	0.03	2.3e-28	123.4
FRZB	Suhre	1000	rs288326	2	183703336	A	G	0.13	0.7	0.06	8.6e-28	123.61
PDK2	Pietzner	10708	rs111564639	17	48172095	A	C	0.03	-0.44	0.04	1.04e-26	123.69
IGFBP6	Sun_2	35571	rs10876406	12	53501437	C	T	0.099	-0.14	0.01	4.17e-37	124.24
CRAT	Ferkingstad	35559	rs6478861	9	131854303	C	T	0.316	-0.09	0.01	1.17e-25	124.96
NT5C2	Pietzner	10708	rs35243673	10	104934396	C	CAA	0.3	0.17	0.01	3.25e-35	125.36
GRPEL1	Pietzner	10708	rs56659624	4	7069377	C	G	0.09	-0.27	0.02	4.39e-34	125.54
PDGFC	Sun_2	35571	rs12499706	4	157095850	G	C	0.275	-0.09	0.01	7.06e-32	125.62
DARS1	Sun_2	35571	rs149170955	2	136691500	A	G	0.002	-0.97	0.09	1.37e-28	126.07
GC	Pietzner	10708	rs7697091	4	72625097	A	C	0.64	0.16	0.01	5.46e-32	126.19
FAM171B	Sun_1	3301	rs10931256	2	187685195	C	T	0.216	-0.33	0.03	1.1e-29	126.34
CCDC134	Pietzner	10708	rs10608168	22	42230349	T	TCA	0.56	0.15	0.01	2.6e-33	126.6
NANS	Pietzner	10708	rs1058446	9	100823135	C	G	0.24	0.18	0.02	1.49e-32	126.62
PCNP	Pietzner	10708	rs10936715	3	101345965	A	G	0.51	-0.15	0.01	1.39e-33	126.74
ROR2	Pietzner	10708	rs10820900	9	94495608	T	C	0.35	0.16	0.01	2.78e-33	127.77
DCXR	Sun_2	35571	rs61746217	17	79993919	T	C	0.003	-0.76	0.06	1.36e-33	127.77
SIAE	Pietzner	10708	rs78778622	11	124530664	T	C	0.94	0.32	0.03	8.33e-31	128.29
GALNT7	Sun_2	35571	rs144873913	4	174235304	A	C	0.002	-0.87	0.08	6.57e-31	128.49
DTD2	Pietzner	10708	rs138832021	14	31906728	A	C	0.13	-0.23	0.02	1.78e-34	128.52
LGALS2	Sun_1	3301	rs5756729	22	37961353	T	C	0.593	-0.28	0.03	2.2e-26	129.76
SERPINH1	Pietzner	10708	rs636418	11	75292742	A	T	0.42	-0.16	0.01	4.89e-36	130.13
ADM	Yao	6861	rs2923091	11	10358145	A	G	0.662	-0.2	0.03	2.28e-16	130.16
SLPI	Pietzner	10708	rs916311	20	43736533	T	G	0.34	-0.16	0.01	1.23e-30	130.81
C5	Pietzner	10708	rs17220750	9	123787999	A	G	0.1	0.26	0.02	7.81e-32	130.85
ANKRD27	Pietzner	10708	rs12151311	19	33112707	T	C	0.36	-0.16	0.01	4.61e-32	131.06
CHRD	Ferkingstad	35559	rs34095724	3	184099050	T	C	0.054	-0.19	0.02	7.08e-27	131.17
SHH	Ferkingstad	35559	rs10225292	7	156173238	C	T	0.348	-0.09	0.01	2.19e-26	131.18
F2	Pietzner	10708	rs1799963	11	46761055	A	G	0.01	0.78	0.07	2.4e-33	131.22
SLITRK5	Pietzner	10708	rs34509844	13	88703595	C	CT	0.3	-0.17	0.01	2.31e-35	131.55
SYT11	Pietzner	10708	rs145976521	1	155816085	A	G	0.11	-0.25	0.02	7.26e-32	132.64
CCL22	Sun_1	3301	rs41398344	16	57394393	C	T	0.01	-1.4	0.12	4.1e-32	133.2
DNAJC30	Sun_1	3301	rs73702564	7	73084816	T	C	0.039	0.72	0.06	6.9e-31	133.38
C1orf198	Pietzner	10708	rs61826310	1	231002496	T	C	0.17	0.21	0.02	1.59e-33	133.62
PLXNA4	Sun_2	35571	rs6467443	7	132238011	T	G	0.217	0.11	0.01	1.89e-31	133.72
ADAMTS15	Sun_2	35571	rs73044885	11	130344063	A	G	0.055	0.19	0.02	5.32e-29	133.75
SBDS	Pietzner	10708	rs79344818	7	66453476	A	G	0.96	0.4	0.03	7.12e-34	133.87
IL18BP	Sun_2	35571	rs5743659	11	71709878	A	G	0.006	-0.55	0.05	7.52e-32	134.06
EREG	Sun_2	35571	rs78803121	4	75248505	T	G	0.058	-0.19	0.02	3.08e-31	134.32
SECTM1	Sun_1	3301	rs4789763	17	80289284	G	A	0.493	0.28	0.02	3.8e-30	134.57
GGPS1	Pietzner	10708	rs116088703	1	235498377	A	G	0.12	0.24	0.02	9.35e-38	135.2
SCARF1	Suhre	1000	rs8071756	17	1574342	G	A	0.22	0.59	0.05	9.4e-31	135.41
CETN3	Pietzner	10708	rs6864721	5	89750018	A	T	0.27	-0.18	0.02	6.22e-34	135.41
ALDOC	Pietzner	10708	rs56147019	17	26991821	T	C	0.02	-0.57	0.06	5.87e-23	135.67
CCL23	Suhre	1000	rs41341749	17	34310702	G	A	0.06	1.03	0.08	3.1e-32	136.26
OMG	Sun_2	35571	rs72813607	17	29461525	A	G	0.14	-0.13	0.01	2.11e-36	136.42
CFH	Suhre	1000	rs10737680	1	196679455	C	A	0.42	0.5	0.04	1.3e-36	136.53
ULK3	Pietzner	10708	rs2290574	15	75135447	T	C	0.29	0.18	0.02	7.86e-32	136.74
FABP9	Sun_2	35571	rs28497692	8	82412691	T	G	0.039	-0.23	0.02	9.05e-37	137.42
CMBL	Pietzner	10708	rs11738492	5	10307022	T	C	0.63	0.17	0.01	5.87e-31	137.63
CD55	Suhre	1000	rs12134133	1	207457845	A	G	0.28	-0.55	0.04	1.6e-33	138.06
GP6	Suhre	1000	rs1654439	19	55553647	T	G	0.17	-0.66	0.06	6.6e-31	138.43
ADH6	Pietzner	10708	rs62325239	4	99987492	A	G	0.96	0.41	0.03	1.45e-38	138.64
SNAP29	Pietzner	10708	rs73159197	22	21040925	A	G	0.92	0.3	0.02	1.57e-36	138.92
PSME2	Sun_2	35571	rs2236352	14	24610733	C	T	0.257	0.1	0.01	1.54e-36	138.93
HDGFRP3	Ferkingstad	35559	rs9919979	15	83748799	A	C	0.064	0.18	0.02	6.76e-29	138.97
ART3	Sun_1	3301	rs4859610	4	77000441	G	A	0.774	-0.34	0.03	3e-32	139.04
TCN1	Sun_1	3301	rs34528912	11	59631535	T	C	0.042	-0.71	0.06	4.6e-30	139.49
ATP1B2	Sun_1	3301	rs1642762	17	7554772	T	C	0.587	-0.29	0.03	1.5e-29	140.24
NPPB	Sun_1	3301	rs198389	1	11919271	G	A	0.413	0.29	0.03	3.5e-31	140.24
PTK7	Pietzner	10708	rs140147428	6	43067044	T	C	0.04	0.41	0.04	1.67e-31	140.72
IGSF3	Sun_2	35571	rs2284860	1	117122887	C	T	0.216	0.11	0.01	3.55e-33	141.17
SPINK2	Sun_1	3301	rs11941335	4	57689460	T	C	0.021	1	0.08	2.2e-33	141.47
S100A14	Ferkingstad	35559	rs9330298	1	153590254	A	C	0.43	-0.09	0.01	6.31e-28	141.76
LAMB1_LAMC1_LAMA1	Sun_1	3301	rs4129858	1	183004334	G	A	0.431	-0.29	0.02	7.1e-34	141.94
NDRG3	Pietzner	10708	rs111279459	20	35373277	T	C	0.98	-0.58	0.05	1.73e-34	142.07
DCLK1	Pietzner	10708	rs7982300	13	36641930	T	C	0.78	-0.2	0.02	2.68e-35	143.04
SRI	Pietzner	10708	rs77010538	7	87864495	A	G	0.2	0.2	0.02	2.7e-36	143.07
DNAJB11	Pietzner	10708	rs56324474	3	186287166	A	G	0.09	-0.28	0.02	3.51e-36	143.34
RTN4IP1	Pietzner	10708	rs2054365	6	107077502	A	G	0.4	0.17	0.01	1.18e-41	143.51
FOLR1	Sun_2	35571	rs115974400	11	71878862	C	T	0.068	-0.18	0.01	4.93e-37	143.81
KPNA6	Pietzner	10708	rs72666722	1	32462654	T	G	0.02	0.58	0.05	9.64e-39	144.07
IGLON5	Ferkingstad	35559	rs148108087	19	51781455	A	G	0.053	0.2	0.02	3.16e-29	144.37
SEMA6B	Ferkingstad	35559	rs10404223	19	4549646	A	G	0.482	-0.09	0.01	1.07e-28	144.39
LYVE1	Pietzner	10708	rs35468145	11	10647995	A	G	0.04	0.42	0.03	1.96e-38	144.91
CCL20	Sun_2	35571	rs1395338	2	228648323	A	G	0.6	0.09	0.01	1.32e-30	145.05
KCNAB2	Pietzner	10708	rs806109	1	6052581	A	G	0.76	0.19	0.01	2.77e-41	145.94
CNTN1	Yao	6861	rs1838343	12	41196230	C	T	0.58	0.21	0.02	6.45e-24	146.24
MRVI1	Pietzner	10708	rs10840457	11	10675738	A	G	0.32	0.18	0.01	8.6e-38	146.3
CNN1	Pietzner	10708	rs73512794	19	11620979	T	C	0.95	0.38	0.03	3.57e-44	146.53
SEPTIN9	Sun_2	35571	rs55645755	17	75452693	G	A	0.016	-0.37	0.03	3.11e-34	146.94
PRSS22	Sun_1	3301	rs3810801	16	2892370	A	C	0.333	0.31	0.03	3.7e-33	147.11
ACY1	Pietzner	10708	rs150416778	3	52016836	T	C	0.02	-0.59	0.05	1.22e-29	148.11
CARD9	Pietzner	10708	rs4077515	9	139266496	T	C	0.43	0.17	0.01	1.67e-35	148.39
FBLN1	Pietzner	10708	rs11090631	22	45846371	T	C	0.19	-0.21	0.02	5.19e-37	148.75
DTX3	Sun_2	35571	rs2277323	12	58009372	A	G	0.248	-0.11	0.01	4.51e-40	149.74
OBP2B	Sun_1	3301	rs4454354	9	136089529	C	T	0.786	0.36	0.03	2.7e-33	150.39
DUSP13	Sun_1	3301	rs6480771	10	76861680	C	T	0.415	-0.3	0.02	8.3e-34	150.75
SPOCK2	Pietzner	10708	rs1668153	10	73844563	A	G	0.55	-0.17	0.01	9.93e-39	151.69
MFNG	Pietzner	10708	rs8192548	22	37866063	A	G	0.02	-0.6	0.05	1.86e-33	151.7
HGF	Sun_2	35571	rs5745687	7	81359051	T	C	0.065	-0.19	0.02	1.13e-35	152.05
CRP	Pietzner	10708	rs4546916	1	159699249	T	G	0.33	-0.18	0.01	1.81e-35	152.13
PSG7	Pietzner	10708	rs113247044	19	43439694	A	G	0.83	-0.22	0.02	3.43e-35	152.38
HPSE	Pietzner	10708	rs61751211	4	84223426	T	C	0.99	0.84	0.07	2.62e-37	153.16
PPCS	Pietzner	10708	rs11210644	1	42903360	A	T	0.37	-0.17	0.01	2.12e-40	153.28
RCL	Ferkingstad	35559	rs144767533	6	43186138	C	T	0.092	-0.16	0.01	3.16e-30	153.33
NOTUM	Pietzner	10708	rs74002709	17	79924552	A	C	0.05	-0.39	0.03	1.26e-31	153.72
SERPINE1	Sun_2	35571	rs2227674	7	100776208	G	A	0.2	-0.12	0.01	5.2e-38	153.76
MYORG	Sun_1	3301	rs10972076	9	34356359	T	C	0.625	0.31	0.03	2.2e-34	155.62
COL9A1	Pietzner	10708	rs3806095	6	70987976	A	G	0.3	-0.19	0.02	3.8e-33	156.14
SEPSECS	Pietzner	10708	rs4697549	4	25115598	C	G	0.05	-0.39	0.03	1e-36	156.15
MCEE	Pietzner	10708	rs6740268	2	71345964	T	G	0.82	0.22	0.02	5.93e-41	156.62
CST1	Suhre	1000	rs6114248	20	23711882	A	G	0.31	0.56	0.04	5e-37	157.2
CHMP1A	Sun_2	35571	rs460879	16	89712889	T	C	0.427	-0.1	0.01	1.6e-32	157.78
CD72	Pietzner	10708	rs7465764	9	35614924	A	G	0.94	-0.36	0.03	2.12e-36	157.94
SNPH	Pietzner	10708	rs3795141	20	1281004	T	C	0.65	-0.18	0.01	7.35e-36	158.39
SLC39A14	Sun_2	35571	rs35486529	8	22251868	T	C	0.255	-0.11	0.01	3.55e-33	158.46
C1R	Suhre	1000	rs12146727	12	7170336	A	G	0.13	-0.78	0.06	3.4e-35	159.26
LUM	Pietzner	10708	rs1803343	12	91539784	T	C	0.98	0.61	0.05	1.3e-35	159.53
CDH2	Sun_2	35571	rs11872284	18	25680423	T	C	0.312	-0.1	0.01	4.27e-48	159.56
FLII	Pietzner	10708	rs138865936	17	18165019	T	C	0.03	0.5	0.04	3.14e-39	160.65
APOBEC3G	Pietzner	10708	rs6519166	22	39472177	A	C	0.67	-0.18	0.01	4.86e-43	160.93
PON1	Yao	6861	rs61121205	7	95160646	C	G	0.725	-0.24	0.02	9.6e-32	161.24
MAVS	Sun_2	35571	rs45437096	20	3844929	T	C	0.145	-0.14	0.01	1.27e-34	161.37
ITGB7	Sun_2	35571	rs12232003	12	53593632	C	T	0.075	0.18	0.01	1.56e-44	163.42
ARHGEF25	Pietzner	10708	rs10437954	12	58003922	A	G	0.91	-0.3	0.02	4.11e-39	163.46
CHST9	Sun_1	3301	rs9952639	18	24709604	C	G	0.318	0.33	0.03	7.2e-37	163.56
CELA2A	Ferkingstad	35559	rs78880003	1	15740930	T	C	0.061	-0.2	0.02	5.62e-31	163.94
ABLIM3	Pietzner	10708	rs114464628	5	148533724	A	G	0.04	-0.45	0.03	3.64e-40	165.33
CDH5	Pietzner	10708	rs1972838	16	66428226	A	C	0.32	-0.19	0.01	3.25e-39	165.45
NHEJ1	Pietzner	10708	rs6713887	2	220026369	T	G	0.64	-0.18	0.01	4e-41	165.94
SAR1A	Pietzner	10708	rs4746023	10	71912664	A	G	0.44	0.18	0.01	2.86e-47	165.96
NPTX2	Pietzner	10708	rs11773439	7	98286099	A	C	0.72	0.2	0.01	1.02e-42	166.7
LGALS4	Sun_2	35571	rs140695578	19	39265229	T	A	0.032	0.27	0.02	3.81e-47	166.71
HDHD2	Sun_1	3301	rs75228657	18	44741063	G	A	0.052	0.7	0.05	4.7e-38	167.47
LIMA1	Pietzner	10708	rs10783342	12	50628466	T	C	0.42	-0.18	0.01	1.32e-40	167.85
SLAMF1	Sun_2	35571	rs7535367	1	160638250	T	G	0.139	-0.14	0.01	4.17e-37	167.86
FGFBP1	Sun_2	35571	rs9968276	4	15949551	A	G	0.202	-0.12	0.01	3.32e-41	168.81
CD59	Sun_1	3301	rs2273121	11	33757770	A	G	0.252	-0.36	0.03	4.7e-41	169.46
TMPRSS15	Sun_2	35571	rs2824805	21	19770734	C	G	0.173	0.13	0.01	4.5e-38	170.34
SESTD1	Sun_2	35571	rs10170520	2	180094613	T	A	0.329	-0.1	0.01	1.22e-38	170.75
ATXN10	Sun_2	35571	rs138166	22	46131238	A	G	0.299	0.11	0.01	8.47e-41	171.37
VASH1	Sun_2	35571	rs11159226	14	77181432	G	T	0.06	0.21	0.02	2.76e-38	171.4
HS6ST3	Ferkingstad	35559	rs9562027	13	96762843	T	A	0.407	0.1	0.01	8.71e-31	172.45
ELMO1	Pietzner	10708	rs79483315	7	37461507	C	G	0.93	0.35	0.03	3.62e-36	172.52
DNAJB6	Pietzner	10708	rs12668458	7	157145474	T	C	0.54	-0.18	0.01	6.91e-46	173.17
CBLN4	Pietzner	10708	rs6024420	20	54371100	T	C	0.31	-0.19	0.01	8.85e-41	173.36
CALCOCO1	Sun_2	35571	rs17102261	12	54126732	G	T	0.15	0.14	0.01	2.55e-43	173.57
SRA1	Pietzner	10708	rs801458	5	139953189	T	C	0.47	0.18	0.01	2.64e-47	173.67
OVCA2	Pietzner	10708	rs145234879	17	1945354	A	C	0.02	0.64	0.06	2.38e-29	174.15
HGD	Pietzner	10708	rs2042482	3	120394052	A	T	0.26	-0.2	0.02	4.42e-44	174.23
LGALS3BP	Pietzner	10708	rs111526614	17	76962761	T	C	0.02	-0.64	0.05	3.77e-35	174.7
SULT1A1	Sun_2	35571	rs148788997	16	30323168	C	G	0.126	0.15	0.01	8.43e-42	174.78
CDHR2	Sun_2	35571	rs2963680	5	175942948	T	C	0.502	-0.1	0.01	3.67e-61	175.16
NPL	Pietzner	10708	rs74844585	1	182781838	T	C	0.03	0.53	0.04	3.68e-45	175.22
PDCD5	Sun_1	3301	rs4499344	19	33073431	A	G	0.291	0.35	0.03	1.2e-39	175.64
RIDA	Sun_1	3301	rs1462977	8	99115359	G	A	0.323	-0.34	0.03	2.2e-39	175.67
TRIM3	Pietzner	10708	rs60616451	11	6493153	T	C	0.83	0.24	0.02	1.22e-47	176.9
SERPINB5	Pietzner	10708	rs12454742	18	61156606	C	G	0.69	0.2	0.01	1.48e-41	177.04
SH3BGRL2	Ferkingstad	35559	rs2812679	6	80326010	C	T	0.454	-0.1	0.01	7.94e-35	177.17
HDHD3	Pietzner	10708	rs1043836	9	116136198	T	C	0.64	0.19	0.01	2.32e-48	177.25
USP15	Pietzner	10708	rs73139022	12	62818841	T	C	0.9	-0.3	0.02	7.94e-43	177.49
CXCL16	Pietzner	10708	rs1876444	17	4638484	T	C	0.44	-0.18	0.01	3.05e-42	177.66
RMDN1	Sun_1	3301	rs11781016	8	87529297	C	A	0.489	0.32	0.02	8.3e-39	177.93
UNC5D	Ferkingstad	35559	rs2405810	8	35118625	C	T	0.474	-0.1	0.01	4.68e-34	178.21
IL2RB	Ferkingstad	35559	rs228953	22	37531436	A	G	0.475	0.1	0.01	4.57e-32	178.24
FAS	Pietzner	10708	rs10887883	10	90782973	A	G	0.41	0.18	0.01	9.04e-47	178.28
LTBP2	Sun_2	35571	rs888414	14	75104905	A	G	0.383	-0.1	0.01	4.72e-66	179.19
PTGES2	Pietzner	10708	rs13283456	9	130884753	T	C	0.2	-0.23	0.02	5.77e-45	179.49
CTSS	Suhre	1000	rs41271951	1	150737220	G	A	0.09	-0.97	0.07	4.1e-40	179.63
UBASH3B	Pietzner	10708	rs7116968	11	122526069	T	C	0.25	-0.21	0.02	7.91e-47	180.03
NDST1	Pietzner	10708	rs253293	5	149937956	A	G	0.59	-0.19	0.01	3.04e-43	180.26
DARS2	Pietzner	10708	rs199818983	1	173697103	T	TAA	0.27	-0.21	0.01	2.39e-47	180.35
S100A16	Pietzner	10708	rs35760493	1	153596603	A	G	0.45	0.18	0.01	2.24e-45	180.47
PGF	Folkersen	30000	rs175510	14	75524839	A	G	0.46	0.11	0.01	3.82e-28	181.42
SIRT3	Pietzner	10708	rs11604127	11	196944	T	C	0.23	0.22	0.02	3.84e-43	181.59
NAGK	Sun_1	3301	rs7606102	2	71276399	G	A	0.17	-0.43	0.03	6e-39	181.61
CEP20	Sun_2	35571	rs74009487	16	15965897	T	C	0.056	-0.22	0.02	1.21e-42	182.51
NT5C3A	Sun_2	35571	rs10252880	7	33110659	C	G	0.325	-0.11	0.01	1.56e-41	183.05
BOLA3	Pietzner	10708	rs828889	2	74371995	A	G	0.42	-0.19	0.01	8.75e-50	183.55
LRIG3	Pietzner	10708	rs11172791	12	59272973	T	C	0.95	0.42	0.03	1.57e-42	184.24
SRL	Pietzner	10708	rs9922726	16	4257281	A	C	0.43	0.19	0.01	4.86e-43	184.69
CACNA2D3	Pietzner	10708	rs9878608	3	54157059	C	G	0.6	-0.19	0.01	7.34e-45	184.76
RPS6KA1	Pietzner	10708	rs11589734	1	26860999	A	G	0.54	0.19	0.01	1.92e-43	185.18
TNFRSF13B	Sun_2	35571	rs34562254	17	16842991	A	G	0.097	-0.17	0.01	1.35e-46	185.3
FGF23	Sun_2	35571	rs6489536	12	4491909	C	G	0.338	0.11	0.01	1.56e-41	186.72
IL10	Sun_2	35571	rs3024495	1	206942413	T	C	0.154	-0.14	0.01	9.16e-46	187.57
CALCA	Sun_2	35571	rs10766197	11	14921880	A	G	0.453	-0.1	0.01	4.72e-66	188
VWA2	Pietzner	10708	rs35060624	10	115899540	T	C	0.09	0.33	0.03	6.18e-40	188.49
CCN1	Sun_2	35571	rs4949896	1	86062336	T	G	0.262	-0.12	0.01	1.95e-48	189.29
AP1G2	Pietzner	10708	rs7159262	14	24020127	A	C	0.91	0.33	0.02	4.38e-47	189.67
TMEM2	Pietzner	10708	rs4143770	9	74267330	C	G	0.28	-0.21	0.02	2.26e-45	190.07
DKK1	Sun_2	35571	rs7097068	10	54119880	G	T	0.435	-0.1	0.01	6.25e-50	190.14
NAP1L4	Pietzner	10708	rs12364426	11	2956566	T	C	0.23	-0.22	0.02	4.75e-52	190.21
GLRX2	Sun_1	3301	rs148212596	1	193074511	G	A	0.02	1.18	0.09	3.5e-41	190.46
RPN1	Sun_1	3301	rs2712417	3	128345179	G	A	0.618	-0.34	0.02	3.1e-44	190.46
CD14	Pietzner	10708	rs5744454	5	140013567	T	G	0.76	0.22	0.01	1.85e-52	190.65
EPHB2	Sun_1	3301	rs6687487	1	23061551	A	G	0.08	-0.61	0.04	1.3e-42	191.17
PRSS8	Sun_2	35571	rs889555	16	31122571	T	C	0.282	0.12	0.01	7.43e-47	191.47
NEGR1	Pietzner	10708	rs1194278	1	72714220	T	C	0.5	0.19	0.01	1.54e-45	192.6
ENAH	Sun_2	35571	rs10799316	1	225668031	A	G	0.755	0.12	0.01	3.32e-41	193.92
IGF1R	Sun_2	35571	rs3743249	15	99505423	T	G	0.252	0.12	0.01	7.34e-51	194.04
NUDT1	Pietzner	10708	rs143499401	7	2292617	C	CCCTGTTCT	0.02	-0.67	0.05	8.67e-42	194.1
HAGH	Pietzner	10708	rs7185299	16	1879423	T	C	0.14	0.27	0.02	1.15e-45	194.19
ASPH	Pietzner	10708	rs2350578	8	62660578	A	G	0.65	0.2	0.01	1.03e-48	194.44
ROBO2	Sun_2	35571	rs775722	3	77643616	C	T	0.447	-0.11	0.01	7.34e-51	194.9
LARGE	Ferkingstad	35559	rs3210587	22	34316077	A	G	0.344	0.11	0.01	4.9e-40	195.27
FBP2	Pietzner	10708	rs499480	9	97352468	T	G	0.86	0.27	0.02	1.9e-47	195.65
NBL1	Sun_2	35571	rs12408663	1	19968058	C	T	0.233	-0.12	0.01	3.47e-43	196.32
FABP5	Sun_2	35571	rs118019635	8	82193282	A	C	0.074	-0.2	0.01	9.61e-47	196.8
TGM2	Pietzner	10708	rs13044109	20	36800222	T	G	0.62	0.2	0.01	3.41e-46	197.37
IGFALS	Pietzner	10708	rs1065656	16	1838836	C	G	0.31	-0.21	0.01	9.83e-52	197.95
C1QTNF3	Pietzner	10708	rs840390	5	34018623	A	G	0.13	-0.28	0.02	2.44e-51	198.95
ATP5IF1	Sun_2	35571	rs510379	1	28535233	C	T	0.359	0.11	0.01	5.09e-43	199.26
SERPINA4	Suhre	1000	rs882732	14	95027722	A	G	0.25	0.67	0.04	7.7e-48	199.84
ACAN	Sun_2	35571	rs11073804	15	89252012	A	T	0.198	0.13	0.01	2.04e-49	201.03
IL17RD	Suhre	1000	rs1463657	3	57137461	C	A	0.33	0.62	0.04	1.4e-42	202.01
C3	Pietzner	10708	rs11569415	19	6716279	A	G	0.21	0.24	0.02	5.41e-46	203.32
PRDX1	Pietzner	10708	rs2356552	1	46009316	T	C	0.1	-0.32	0.02	1.63e-48	203.61
ZADH2	Pietzner	10708	rs9240	18	72910687	T	C	0.58	0.2	0.01	7.93e-55	204.2
CKM_CKB	Pietzner	10708	rs11559024	19	45821183	T	C	0.98	0.69	0.05	4.35e-53	204.21
LRP8	Pietzner	10708	rs2297663	1	53722752	A	C	0.59	-0.2	0.01	4.85e-48	204.86
FOLR2	Sun_2	35571	rs146893981	11	71917353	T	C	0.03	0.32	0.02	1.74e-51	205.85
LAMB1_LAMC1_LAMA2	Pietzner	10708	rs3816665	6	129571330	A	G	0.13	-0.29	0.02	1.16e-49	206.16
SERPINB9	Sun_2	35571	rs7751676	6	2931879	T	C	0.064	0.22	0.02	2.81e-48	206.17
BCAT2	Pietzner	10708	rs117048185	19	49309776	C	G	0.02	-0.7	0.05	8.75e-45	206.63
GOLM1	Pietzner	10708	rs10780749	9	88720605	A	G	0.12	0.3	0.02	1.71e-50	207.44
CFHR3	Ferkingstad	35559	rs10922098	1	196664651	C	T	0.4	0.11	0.01	1.17e-41	207.74
HMHA1	Pietzner	10708	rs7251797	19	1077985	A	G	0.62	-0.2	0.01	4.29e-49	207.76
SCRN1	Sun_2	35571	rs17324153	7	29966141	C	T	0.043	0.27	0.02	8.92e-50	208.52
PPT1	Sun_1	3301	rs7533094	1	40559686	A	G	0.042	-0.86	0.06	2.3e-46	208.77
VEGFC	Sun_1	3301	rs41278571	4	177650866	T	C	0.01	1.74	0.12	1.3e-46	210.37
PCSK2	Pietzner	10708	rs6044697	20	17230025	A	G	0.49	-0.2	0.01	7.06e-48	211.77
DNAJB4	Pietzner	10708	rs6699769	1	78504264	A	G	0.79	0.24	0.02	6.35e-53	212.16
IVD	Pietzner	10708	rs7165012	15	40654038	A	G	0.46	-0.2	0.01	9.16e-55	212.66
ITIH4	Pietzner	10708	rs77347777	3	52848207	T	C	0.12	-0.3	0.02	1.88e-47	213.12
IFI16	Sun_1	3301	rs72709516	1	159004851	T	C	0.044	0.85	0.06	2.6e-49	213.5
NTN4	Pietzner	10708	rs17288108	12	96131895	A	G	0.83	0.26	0.02	2.78e-54	214.79
ALDOB	Pietzner	10708	rs142540788	9	104209068	A	G	0.99	1	0.06	1.3e-58	214.94
TFF2	Sun_2	35571	rs225344	21	43775884	A	G	0.726	0.12	0.01	2.41e-53	215.19
CPM	Sun_2	35571	rs7978197	12	69326547	T	C	0.014	-0.47	0.03	4.32e-55	215.78
TFPI2	Sun_2	35571	rs62466701	7	93585663	C	T	0.058	0.24	0.02	2.56e-55	217
MRC2	Pietzner	10708	rs146385050	17	60637258	A	C	0.18	-0.26	0.02	2.14e-49	217.99
SDF2L1	Pietzner	10708	rs73166641	22	21998280	A	G	0.01	1	0.06	4.23e-73	218.03
PIP4K2A	Pietzner	10708	rs4498867	10	23180619	A	T	0.74	0.23	0.01	3.45e-57	218.53
TNFSF11	Sun_2	35571	rs2062305	13	43052880	A	G	0.532	-0.11	0.01	1.25e-56	219.58
CD109	Suhre	1000	rs10455097	6	74493432	C	A	0.49	0.6	0.04	3.2e-46	221.65
TGFA	Sun_2	35571	rs17639251	2	70776281	C	T	0.119	0.17	0.01	4.12e-55	222.66
CD163	Sun_2	35571	rs11054859	12	7769776	A	G	0.102	-0.19	0.01	1.26e-53	225.2
BIN2	Sun_2	35571	rs149960700	12	51705168	CTTATTTA	C	0.108	-0.18	0.01	2.08e-51	225.39
SORD	Pietzner	10708	rs72722075	15	45323474	T	C	0.13	0.3	0.02	4.33e-53	225.52
VSTM2L	Sun_2	35571	rs2273349	20	36624756	A	C	0.184	-0.15	0.01	1.21e-47	225.71
CBR1	Sun_1	3301	rs16993864	21	37446599	A	C	0.022	-1.22	0.08	6.6e-49	225.76
FGFR2	Sun_2	35571	rs2981430	10	123311698	A	G	0.58	-0.11	0.01	1.25e-59	226.66
SNX8	Pietzner	10708	rs34750471	7	2290295	A	G	0.01	-1.03	0.06	1.54e-66	227.44
SV2A	Pietzner	10708	rs16836630	1	149898951	C	G	0.08	-0.38	0.02	2.63e-54	227.53
CSGALNACT2	Ferkingstad	35559	rs2435382	10	43677099	T	A	0.332	-0.12	0.01	6.61e-43	228.39
NUDCD3	Pietzner	10708	rs10233273	7	44502186	T	C	0.23	0.24	0.02	7.44e-58	228.7
CGA_LHB	Sun_1	3301	rs139643250	19	49517146	T	C	0.076	-0.68	0.05	2.8e-50	229.13
FOLH1	Pietzner	10708	rs61886537	11	49248755	T	C	0.95	-0.47	0.03	2.02e-57	229.49
SULT1A3	Pietzner	10708	rs148788997	16	30323168	C	G	0.13	0.31	0.02	4.05e-57	230.12
ITGB2	Sun_2	35571	rs760462	21	46328099	C	T	0.818	0.15	0.01	5.72e-60	230.34
DSCAM	Pietzner	10708	rs78111814	21	42060498	T	C	0.96	-0.52	0.03	7.59e-54	230.63
FN1	Suhre	1000	rs1250258	2	216300185	C	T	0.25	-0.71	0.05	1.3e-49	233.45
UNC5C	Pietzner	10708	rs13134684	4	96405913	T	C	0.35	0.22	0.01	8.91e-55	234.4
ADAMTS16	Sun_2	35571	rs40468	5	4982814	G	A	0.338	-0.12	0.01	6.03e-67	234.59
ANXA5	Pietzner	10708	rs9998908	4	122616863	C	G	0.08	0.38	0.02	1.77e-57	235.01
UCMA	Sun_1	3301	rs2093847	10	13276534	T	C	0.107	-0.59	0.04	3.1e-53	235.1
FOXO1	Sun_2	35571	rs17061453	13	41184358	T	A	0.043	0.28	0.02	1.07e-55	236.01
CXADR	Sun_2	35571	rs2739393	21	18934539	A	G	0.669	-0.12	0.01	1.65e-52	236.2
TNFAIP8	Pietzner	10708	rs1032859	5	118641300	A	T	0.88	0.32	0.02	1.11e-66	236.66
TNFRSF14	Sun_2	35571	rs2495366	1	2488930	A	G	0.494	0.12	0.01	1.19e-60	236.73
LTF	Sun_1	3301	rs6441996	3	46505266	C	G	0.238	-0.43	0.03	2e-51	237.15
PARP1	Sun_2	35571	rs1433574	1	226609339	C	A	0.161	-0.16	0.01	1.51e-55	237.96
TIMP4	Sun_1	3301	rs454615	3	12077010	C	T	0.831	0.49	0.03	1.7e-53	238.57
RALB	Pietzner	10708	rs6722943	2	121025601	T	C	0.69	-0.23	0.01	1.93e-57	239.16
SRGN	Pietzner	10708	rs67852477	10	70856963	C	G	0.99	1.05	0.06	3.16e-67	239.85
CCL4L2_CCL4L1	Pietzner	10708	rs8064426	17	34819750	A	G	0.13	-0.31	0.02	1.22e-47	241.05
BANK1	Sun_2	35571	rs3113676	4	102965043	C	T	0.985	0.48	0.03	1.08e-56	241.34
SCO2	Pietzner	10708	rs74479613	22	50963905	T	C	0.09	-0.37	0.02	1.18e-64	241.52
PMM2	Pietzner	10708	rs3826198	16	8906539	A	C	0.79	-0.26	0.02	1.56e-63	241.79
ASF1A	Pietzner	10708	rs147886588	6	119215902	C	G	0.83	-0.28	0.02	3.3e-61	244
MGAT2	Pietzner	10708	rs7141096	14	50025847	A	G	0.54	0.21	0.01	2.31e-62	244.5
NCS1	Sun_2	35571	rs1054879	9	132995768	A	G	0.508	0.12	0.01	1.03e-62	245.07
FST	Folkersen	30000	rs31226	5	53327571	T	C	0.4	0.13	0.01	3.14e-32	245.33
F2R	Sun_2	35571	rs168753	5	76028124	T	A	0.173	-0.16	0.01	3.47e-54	245.65
VPS26A	Pietzner	10708	rs10998625	10	70941700	A	G	0.77	0.25	0.02	5.11e-64	246.35
ERO1B	Sun_1	3301	rs1254194	1	236399442	T	G	0.596	-0.38	0.02	1.9e-56	246.55
CASP8	Folkersen	30000	rs35550815	2	202150914	A	G	0.87	-0.19	0.02	4.79e-26	246.98
APOA1BP	Pietzner	10708	rs6427322	1	156563726	A	C	0.03	-0.62	0.04	1.37e-72	247.43
LRRC15	Sun_1	3301	rs57514363	3	194087927	G	T	0.113	0.59	0.04	5.9e-54	247.48
FAIM3	Ferkingstad	35559	rs72758947	1	207087053	G	A	0.161	-0.16	0.01	6.03e-43	248
FJX1	Pietzner	10708	rs11033388	11	36074218	A	T	0.58	-0.22	0.01	3.9e-59	249.02
ALPPL2	Pietzner	10708	rs11886043	2	233301535	T	C	0.76	-0.25	0.02	7.12e-55	249.79
RNASE4	Sun_1	3301	rs12588573	14	21146584	T	C	0.224	-0.45	0.03	8.9e-54	249.83
CEACAM8	Sun_2	35571	rs12459454	19	42263143	G	A	0.292	-0.13	0.01	2.23e-59	250.24
DNMBP	Sun_2	35571	rs139736391	10	101452711	T	C	0.018	-0.45	0.03	3.3e-50	250.25
NLGN1	Ferkingstad	35559	rs557382	3	173113559	G	T	0.296	0.13	0.01	2.51e-49	252.12
BIN1	Pietzner	10708	rs35103166	2	127882182	T	C	0.62	-0.22	0.01	1.63e-61	252.19
ESD	Suhre	1000	rs947409	13	47377928	G	A	0.1	-1.06	0.07	2.2e-52	253.61
ZFAND1	Pietzner	10708	rs2912817	8	82600027	A	T	0.83	-0.29	0.02	1.48e-61	254.78
PSMD9	Ferkingstad	35559	rs10770186	12	122361412	A	G	0.451	-0.12	0.01	1.48e-48	255.34
SNX1	Pietzner	10708	rs1802376	15	64428559	A	G	0.02	0.77	0.05	1.62e-60	255.42
PIK3R1_PIK3CA	Pietzner	10708	rs4637331	3	178767098	T	C	0.25	-0.25	0.02	3.39e-62	256.94
NCAM1	Yao	6861	rs2199197	11	112608137	A	G	0.483	-0.27	0.02	1.59e-50	257.17
TNFSF8	Pietzner	10708	rs1006026	9	117691270	A	G	0.57	0.22	0.01	4.75e-58	257.76
MZB1	Sun_2	35571	rs140248321	5	138725772	AGAT	A	0.064	0.25	0.02	6.31e-53	258.4
TAC1	Pietzner	10708	rs78145257	7	97366332	A	G	0.17	-0.29	0.02	3.98e-59	258.43
CLIP2	Sun_2	35571	rs117471007	7	73696488	T	C	0.063	0.25	0.02	6.37e-61	258.44
MAX	Pietzner	10708	rs762810	14	65544367	A	C	0.35	-0.23	0.01	8.02e-71	259.36
SIGLEC6	Suhre	1000	rs2124910	19	52025247	T	C	0.41	0.65	0.04	2.7e-46	259.4
PADI2	Sun_2	35571	rs2235913	1	17425077	A	G	0.618	0.12	0.01	3.47e-54	260.19
TMEM106B	Pietzner	10708	rs5011434	7	12268717	T	C	0.42	-0.22	0.01	5.79e-59	260.96
AARSD1	Sun_2	35571	rs323500	17	41140545	T	C	0.29	0.13	0.01	4.59e-62	261.16
HPCAL1	Ferkingstad	35559	rs6737972	2	10474850	C	T	0.173	0.16	0.01	8.32e-53	261.78
SLC39A5	Sun_2	35571	rs147572362	12	56625114	C	T	0.008	-0.7	0.04	1.24e-64	261.82
DDT	Pietzner	10708	rs140117085	22	24298603	T	C	0.04	0.56	0.04	2.7e-47	262.28
EPHX2	Sun_2	35571	rs71553864	8	27394334	AGTC	A	0.058	0.26	0.02	2.23e-59	262.97
TLR4_LY96	Suhre	1000	rs4986791	9	120475602	T	C	0.07	-1.27	0.08	1.8e-50	264.76
GRN	Pietzner	10708	rs5848	17	42430244	T	C	0.28	-0.25	0.02	6.6e-60	265.53
ADH1A	Pietzner	10708	rs28364331	4	100201295	A	G	0.98	0.79	0.05	1.54e-51	265.71
TNFRSF1A	Ferkingstad	35559	rs4149584	12	6442643	T	C	0.021	-0.43	0.03	1.48e-48	266
SPINK7	Pietzner	10708	rs79930019	5	147823506	C	G	0.99	1.11	0.06	1.4e-68	268.2
UGT1A6	Pietzner	10708	rs6742078	2	234672639	T	G	0.32	-0.24	0.01	6.22e-69	268.26
LPA	Yao	6861	rs4646272	6	160551093	T	G	0.924	-0.52	0.04	1.26e-37	268.61
PCOLCE	Pietzner	10708	rs7385804	7	100235970	A	C	0.62	0.23	0.01	5.89e-64	268.83
EFEMP1	Pietzner	10708	rs3791679	2	56096892	A	G	0.77	-0.26	0.02	6.31e-67	268.88
FGF21	Sun_2	35571	rs838131	19	49260677	C	A	0.457	-0.12	0.01	2.41e-53	269.05
CLN5	Pietzner	10708	rs1773045	13	77584886	A	G	0.07	-0.43	0.03	1.66e-63	269.15
ITPKA	Pietzner	10708	rs316617	15	41795900	T	C	0.63	-0.23	0.01	1.31e-67	273.13
RWDD1	Sun_2	35571	rs147899431	6	116892681	C	G	0.043	0.3	0.02	5.43e-64	275.05
CXCL9	Sun_2	35571	rs13118503	4	76860470	T	C	0.241	-0.15	0.01	2.02e-73	275.55
BTNL8	Pietzner	10708	rs201210185	5	180376489	C	CG	0.89	-0.36	0.02	1.8e-60	275.58
FIS1	Pietzner	10708	rs79067051	7	100882477	A	G	0.05	-0.51	0.03	2.89e-81	275.62
TF	Ferkingstad	35559	rs8177245	3	133479230	G	A	0.27	0.14	0.01	4.9e-63	276.93
TNFRSF17	Ferkingstad	35559	rs11570136	16	12058832	A	T	0.354	-0.13	0.01	1.78e-53	277.12
CTSF	Pietzner	10708	rs4930383	11	66340039	T	C	0.76	-0.26	0.02	1.35e-65	279.3
MAPK9	Pietzner	10708	rs113096165	5	179740366	T	C	0.2	0.28	0.02	3.72e-71	279.56
TGFBR3	Sun_2	35571	rs2634023	1	92324150	T	C	0.08	-0.23	0.01	4.81e-70	280.11
KL	Ferkingstad	35559	rs10467359	13	33529264	G	A	0.04	-0.32	0.02	6.92e-53	283.89
ADH5	Pietzner	10708	rs62325239	4	99987492	A	G	0.96	0.58	0.03	2.88e-73	283.93
QSOX1	Sun_1	3301	rs12371	1	180163390	G	A	0.089	0.7	0.04	1.3e-60	284.76
GNPDA1	Pietzner	10708	rs9324861	5	141396566	T	C	0.15	0.32	0.02	9.96e-64	285.21
KIAA1161	Pietzner	10708	rs2039344	9	34329702	C	G	0.37	-0.24	0.01	2.46e-68	285.4
SCUBE3	Pietzner	10708	rs6904920	6	35121346	A	T	0.27	-0.26	0.02	2.91e-68	286.2
CLEC3B	Pietzner	10708	rs10514712	3	45083928	T	C	0.78	0.28	0.02	4.83e-66	287.41
ADH4	Sun_2	35571	rs1800759	4	100065509	G	T	0.613	0.13	0.01	5.47e-77	287.43
B3GAT3	Sun_1	3301	rs12794886	11	62383715	C	G	0.707	0.44	0.03	8.3e-63	287.68
NCAM1	Yao	6861	rs11214489	11	112975934	C	T	0.818	0.37	0.02	3.01e-54	288.19
ALAD	Pietzner	10708	rs1800435	9	116153891	C	G	0.92	0.42	0.03	1.94e-60	288.2
PLXND1	Pietzner	10708	rs2255703	3	129293256	T	C	0.62	0.24	0.01	3.1e-67	288.54
LYZ	Suhre	1000	rs7959452	12	69735492	G	A	0.5	-0.67	0.04	1.2e-60	289.94
FASN	Pietzner	10708	rs7225637	17	80059758	A	G	0.55	-0.23	0.01	1.74e-77	290.46
BPNT2	Sun_1	3301	rs112433249	8	57876576	C	T	0.017	-1.56	0.09	4.1e-65	292.08
TXNL4B	Pietzner	10708	rs116891509	16	72105560	T	C	0.08	0.43	0.02	1.36e-70	292.43
RPIA	Pietzner	10708	rs4281908	2	88970680	A	G	0.03	-0.68	0.04	1.71e-81	292.52
MEPE	Sun_2	35571	rs17013212	4	88754060	T	C	0.137	-0.19	0.01	3.21e-77	292.83
EPHA2	Sun_2	35571	rs924204	1	16513926	G	A	0.59	-0.13	0.01	5.47e-77	293.15
KLK7	Sun_1	3301	rs2739419	19	51484562	G	A	0.908	0.7	0.04	1.1e-66	294.15
SPOCK1	Sun_2	35571	rs4835737	5	136895064	G	A	0.366	-0.13	0.01	4.59e-62	294.24
UBE2C	Pietzner	10708	rs11477536	20	44425026	C	CA	0.64	-0.24	0.01	2.3e-65	294.41
IGSF8	Sun_2	35571	rs12408242	1	160061934	C	T	0.215	0.16	0.01	2.64e-67	294.91
DECR1	Sun_2	35571	rs189045259	8	91051553	A	G	0.005	-0.96	0.06	9.66e-66	295.52
FABP6	Sun_2	35571	rs1130435	5	159659273	T	C	0.401	-0.13	0.01	2.89e-60	295.75
PRCP	Pietzner	10708	rs2229437	11	82564294	T	G	0.82	-0.3	0.02	5.04e-67	296.22
SVEP1	Sun_1	3301	rs61751937	9	113312231	C	G	0.03	1.19	0.07	5.2e-64	296.32
CES2	Sun_2	35571	rs140461033	16	66971964	A	G	0.004	-1.07	0.06	2.19e-69	296.79
RBM17	Pietzner	10708	rs7096838	10	6137083	T	C	0.96	0.59	0.03	3.85e-72	297.16
PHPT1	Pietzner	10708	rs76229681	9	139760830	C	CG	0.74	-0.27	0.02	4.83e-68	297.34
DGCR14	Pietzner	10708	rs715544	22	19133605	A	G	0.09	-0.41	0.02	6.93e-70	298.59
AMY1B_AMY1C_AMY1A	Sun_1	3301	rs7538379	1	104067356	T	C	0.04	-1.04	0.06	4.9e-63	298.86
SDC1	Sun_2	35571	rs907866	2	20371380	A	G	0.447	0.13	0.01	5.47e-77	299.74
ALCAM	Sun_2	35571	rs34926152	3	105264176	T	G	0.049	-0.3	0.02	5.97e-79	299.94
ENO2	Sun_2	35571	rs11446182	12	7022359	AG	A	0.274	0.15	0.01	2.02e-73	300.17
GSS	Pietzner	10708	rs3787215	20	33493877	A	G	0.38	-0.24	0.01	1.45e-79	301.24
CPB1	Pietzner	10708	rs2291671	3	148558447	A	G	0.23	0.28	0.02	5.25e-71	301.31
CFHR5	Sun_1	3301	rs35662416	1	196967354	A	G	0.03	-1.2	0.07	3e-69	301.77
CFHR5	Sun_1	3301	rs72732234	1	196303889	C	T	0.019	-1.5	0.09	7.8e-60	302.04
FGG	Ferkingstad	35559	rs4220	4	155491759	A	G	0.154	0.18	0.01	2.88e-54	302.26
ADH1C	Ferkingstad	35559	rs283415	4	100270607	T	C	0.486	0.13	0.01	2.51e-55	302.78
TNFAIP3	Pietzner	10708	rs59693083	6	138186532	A	G	0.92	-0.43	0.02	3.47e-77	303.85
ENTPD5	Suhre	1000	rs17094448	14	74440119	G	A	0.07	-1.34	0.08	1.2e-60	303.92
NMNAT1	Sun_2	35571	rs180754466	1	10020795	A	C	0.01	0.67	0.04	2.43e-66	303.96
EGF	Sun_2	35571	rs3831508	4	110837903	GT	G	0.402	0.13	0.01	4.59e-62	305.1
ANXA11	Pietzner	10708	rs2819946	10	81951635	A	G	0.58	0.24	0.01	1.25e-73	306.47
MYZAP	Pietzner	10708	rs7162622	15	57857245	T	C	0.68	-0.25	0.02	2.5e-67	306.78
HMBS	Sun_2	35571	rs72997349	11	118945502	C	T	0.031	0.38	0.02	1.95e-72	307
CRACR2A	Sun_2	35571	rs7977865	12	3900555	A	G	0.343	-0.14	0.01	1.12e-66	307.81
CD14	Pietzner	10708	rs5744441	5	140016847	A	G	0.23	-0.28	0.02	2.1e-73	308.04
DPT	Sun_1	3301	rs1018454	1	168697761	C	A	0.586	0.42	0.02	7.8e-67	308.79
CPOX	Ferkingstad	35559	rs1675513	3	98308698	G	A	0.139	-0.19	0.01	5.62e-58	309.92
NMB	Ferkingstad	35559	rs11633788	15	85305142	A	T	0.332	-0.14	0.01	4.17e-61	311.88
DEF6	Pietzner	10708	rs45482297	6	35265535	A	G	0.03	-0.7	0.04	1.65e-85	312.43
PRSS2	Pietzner	10708	rs1799886	7	142498523	T	C	0.57	-0.24	0.01	7.79e-70	313.75
KDR	Sun_1	3301	rs34231037	4	55972946	G	A	0.034	-1.15	0.06	1e-70	313.86
C5_C6	Pietzner	10708	rs41309886	9	123767261	T	TA	0.22	-0.29	0.02	8.7e-71	315.94
SERPINF1	Sun_1	3301	rs62088172	17	1666253	T	C	0.345	-0.44	0.03	1.8e-70	316.33
FES	Sun_2	35571	rs1894401	15	91429042	A	G	0.523	0.13	0.01	4.59e-62	316.7
BPI	Sun_1	3301	rs1780617	20	36974157	G	A	0.122	-0.64	0.04	1.1e-67	317.33
FAM3D	Pietzner	10708	rs17551388	3	58652970	A	C	0.1	-0.4	0.02	1.47e-72	317.48
KNG1	Pietzner	10708	rs710446	3	186459927	T	C	0.6	-0.25	0.01	3.81e-80	317.61
CHAC2	Sun_2	35571	rs78694551	2	53978813	G	A	0.27	-0.15	0.01	1.94e-78	318.08
WASF3	Sun_2	35571	rs1018123	13	27214914	C	T	0.573	0.14	0.01	6.87e-64	320.11
LYPLAL1	Pietzner	10708	rs3084102	1	219340555	A	AGTACTC	0.12	0.37	0.02	3.38e-78	320.54
TBCC	Sun_2	35571	rs2234026	6	42713618	G	A	0.987	0.59	0.03	6.58e-75	321.07
BMP6	Sun_2	35571	rs2327009	6	7718260	T	C	0.477	0.13	0.01	1.11e-81	321.56
VAT1	Sun_2	35571	rs7210098	17	41293613	T	C	0.336	-0.14	0.01	1.72e-70	322.93
NME2_NME1-NME2	Pietzner	10708	rs7207370	17	49231180	A	G	0.6	0.25	0.01	2.57e-73	322.98
CANT1	Sun_2	35571	rs17739056	17	76995205	C	T	0.116	-0.21	0.01	1.43e-68	323.9
AKR7A2	Pietzner	10708	rs12122880	1	19661156	T	C	0.66	0.26	0.01	1.12e-80	324.43
TPST2	Pietzner	10708	rs6005067	22	26923325	A	G	0.43	0.25	0.01	4.25e-80	324.57
FKBP7	Sun_1	3301	rs145766673	2	179289249	C	CTTCT	0.173	0.56	0.03	7.9e-71	325.22
PXDN	Ferkingstad	35559	rs73182757	2	1747897	G	A	0.282	0.15	0.01	1.48e-58	326.74
POGLUT3	Sun_1	3301	rs74911261	11	108357137	A	G	0.027	-1.31	0.07	1.1e-69	326.94
KRT5	Ferkingstad	35559	rs641615	12	52912909	T	G	0.232	-0.16	0.01	1.82e-61	327.56
PRDX6	Sun_2	35571	rs33951697	1	173458326	T	C	0.185	0.17	0.01	2.82e-83	327.59
CDKN1A	Sun_2	35571	rs3176345	6	36650565	C	G	0.065	-0.28	0.02	4.49e-75	328.08
GFRAL	Pietzner	10708	rs60761034	6	55258516	T	C	0.14	0.35	0.02	5.25e-74	329.25
MCAM	Sun_2	35571	rs34587557	11	119185677	C	T	0.051	-0.31	0.02	4.22e-83	331.81
C5	Pietzner	10708	rs41309886	9	123767261	T	TA	0.22	-0.3	0.02	1.35e-74	331.91
BDH2	Pietzner	10708	rs78336913	4	104111414	T	C	0.19	0.31	0.02	4.27e-83	332.88
POLI	Pietzner	10708	rs3218784	18	51807260	A	G	0.97	0.72	0.04	2.35e-69	333.06
PLOD2	Pietzner	10708	rs6801418	3	145833232	A	C	0.51	0.25	0.01	2.93e-80	333.91
CCL17	Pietzner	10708	rs16956811	16	57444002	T	G	0.92	-0.46	0.02	1.3e-78	336.51
PATE4	Sun_1	3301	rs875500	11	125698654	A	T	0.72	-0.48	0.03	1e-75	337.85
B4GALT1	Pietzner	10708	rs7019909	9	33113322	T	C	0.1	0.41	0.02	2.07e-80	339.11
CCL7	Suhre	1000	rs3138036	17	32647544	G	A	0.15	-1	0.05	1.8e-69	341.6
C1QC	Sun_1	3301	rs78865058	1	22944209	A	G	0.042	1.08	0.06	4.3e-71	341.73
MMP16	Pietzner	10708	rs4961089	8	89348016	T	C	0.69	-0.27	0.01	8.53e-78	342
TSG101	Pietzner	10708	rs1395319	11	18548183	T	G	0.66	-0.26	0.01	2.17e-89	342.99
IL12RB1	Suhre	1000	rs376008	19	18189568	T	C	0.34	-0.76	0.04	6.3e-69	345.54
BSG	Sun_2	35571	rs56101188	19	586745	C	T	0.09	0.24	0.01	2.41e-77	345.9
GZMK	Ferkingstad	35559	rs10471928	5	54298731	T	C	0.437	-0.14	0.01	1.58e-69	346.21
MAN1C1	Pietzner	10708	rs2072748	1	26097731	T	C	0.51	-0.25	0.01	6.95e-78	348.07
CADM1	Ferkingstad	35559	rs11215406	11	115065082	C	T	0.316	0.15	0.01	1.15e-68	349.42
PLAU	Sun_2	35571	rs55744193	10	75672059	A	G	0.007	-0.82	0.04	5.51e-89	350.04
TIE1	Pietzner	10708	rs3120276	1	43779564	T	C	0.39	-0.26	0.01	1.52e-83	350.16
B4GALT6	Sun_1	3301	rs201022770	18	29213359	CT	C	0.043	-1.08	0.06	1.7e-77	350.32
GPNMB	Pietzner	10708	rs2268748	7	23313171	T	C	0.96	-0.64	0.03	3.16e-85	351.09
ERBB2	Sun_2	35571	rs3764354	17	37916823	T	C	0.146	0.2	0.01	2.98e-87	351.36
CRIP2	Sun_2	35571	rs80324969	14	105917816	C	G	0.171	0.19	0.01	3.21e-77	352.17
TMEM132B	Ferkingstad	35559	rs3825381	12	126136863	T	C	0.258	-0.16	0.01	2.57e-68	352.32
ASPN	Sun_1	3301	rs2516568	9	95187380	T	A	0.323	-0.47	0.03	2.3e-79	352.8
BST2	Sun_2	35571	rs8101243	19	17488793	C	T	0.957	-0.35	0.02	7.03e-82	355.83
MPO	Pietzner	10708	rs34097845	17	56358429	T	C	0.05	-0.58	0.03	2.76e-76	358.49
STAMBPL1	Pietzner	10708	rs1147606	10	90623372	A	C	0.52	0.26	0.01	2.78e-91	359.18
CRYBB1	Pietzner	10708	rs4822754	22	27012894	A	G	0.47	0.26	0.01	2.57e-86	361.35
CD164	Sun_2	35571	rs6929023	6	109720350	A	G	0.33	-0.15	0.01	1.83e-79	362.39
C8A_C8B_C8G	Pietzner	10708	rs12067507	1	57422511	T	C	0.05	0.59	0.03	5.46e-90	363.59
HSPG2	Pietzner	10708	rs12742444	1	22180723	T	C	0.06	0.54	0.03	2.19e-78	364.12
GNRH2	Pietzner	10708	rs3761244	20	3023181	A	G	0.84	0.35	0.02	1.62e-81	364.53
TWSG1	Pietzner	10708	rs4798783	18	9174885	A	G	0.7	0.28	0.01	4.29e-93	364.53
ITGAV	Sun_2	35571	rs2595391	2	187532373	G	T	0.109	0.23	0.01	2.96e-96	364.55
IQGAP2	Sun_2	35571	rs10037254	5	75930640	A	G	0.605	0.15	0.01	2.07e-74	366.24
SERPINF2	Pietzner	10708	rs11078597	17	1618363	T	C	0.81	0.33	0.02	2.01e-86	366.66
LSAMP	Ferkingstad	35559	rs1541871	3	116102816	T	C	0.151	-0.2	0.01	7.41e-70	369.26
GLTPD2	Pietzner	10708	rs34460487	17	4685228	A	G	0.35	0.27	0.01	1.76e-88	370.12
PLCG2	Pietzner	10708	rs12445050	16	81870969	T	C	0.14	0.37	0.02	1.09e-90	373.17
CLEC1B	Sun_2	35571	rs521040	12	10147850	C	T	0.254	0.17	0.01	1.23e-95	375.36
PRDX5	Sun_2	35571	rs77269065	11	64087269	A	G	0.005	0.99	0.05	3.55e-80	375.37
LSP1	Sun_2	35571	rs907612	11	1874221	T	C	0.379	0.15	0.01	2.01e-77	375.64
NT5M	Pietzner	10708	rs192436452	17	17206672	C	G	0.05	0.6	0.03	1.34e-94	376.5
SEMA7A	Sun_2	35571	rs78994380	15	74692412	A	C	0.112	-0.23	0.01	7.03e-82	377.66
PREP	Ferkingstad	35559	rs12192369	6	105777378	G	A	0.14	-0.21	0.01	8.51e-77	382.56
KIAA1467	Ferkingstad	35559	rs117172138	12	13193814	T	C	0.02	0.52	0.03	1.12e-78	382.82
NTF3	Sun_2	35571	rs73039984	12	5549456	T	C	0.113	-0.23	0.01	1.41e-82	383.39
CTSL	Sun_2	35571	rs3118869	9	90340863	A	C	0.438	-0.15	0.01	3.21e-99	387.7
GUK1	Pietzner	10708	rs10495278	1	228314350	C	G	0.96	-0.68	0.03	3.31e-89	388.21
FGFR3	Ferkingstad	35559	rs2403274	4	1754515	G	C	0.253	-0.17	0.01	4.27e-77	392.29
ENO1	Sun_2	35571	rs11544513	1	8926474	T	G	0.003	-1.29	0.06	4.46e-90	392.44
HP	Suhre	1000	rs217181	16	72114002	T	C	0.19	0.96	0.05	1.3e-75	392.92
A2ML1	Pietzner	10708	rs1558526	12	9009820	A	G	0.26	-0.3	0.02	9.5e-90	394.76
KIR2DL4	Pietzner	10708	rs3745900	19	55377583	T	C	0.23	0.32	0.02	1.93e-93	395.12
PTPRN2	Sun_2	35571	rs3800860	7	157903504	T	C	0.357	-0.16	0.01	1.25e-83	396.75
MUC16	Folkersen	30000	rs11672713	19	9136306	C	G	0.72	-0.18	0.02	2.26e-19	397.07
CRYGD	Pietzner	10708	rs11690925	2	208977161	T	C	0.29	-0.3	0.02	3.49e-88	397.93
ISOC1	Pietzner	10708	rs34942382	5	128288602	C	G	0.71	-0.3	0.01	3.29e-99	397.93
DUSP28	Pietzner	10708	rs148245427	2	241386175	C	G	0.98	0.96	0.05	1.61e-72	400.4
WWOX	Pietzner	10708	rs11545029	16	78420775	A	G	0.59	-0.27	0.01	4.66e-94	400.47
PEAR1	Pietzner	10708	rs4661012	1	156885491	T	G	0.64	0.28	0.01	3.8e-97	401.27
MAPRE2	Ferkingstad	35559	rs3786314	18	32720189	G	A	0.457	-0.15	0.01	1.2e-73	401.49
ANGPTL3	Pietzner	10708	rs11207970	1	62915473	T	C	0.35	-0.28	0.01	2.13e-96	401.92
KREMEN1	Pietzner	10708	rs713526	22	29543415	A	G	0.01	-1.35	0.07	2.9e-92	402.64
SEZ6L2	Sun_2	35571	rs113443718	16	29892184	A	G	0.309	0.16	0.01	1.72e-118	402.85
LIFR	Sun_2	35571	rs3729734	5	38527308	A	G	0.046	-0.36	0.02	1.57e-99	404.96
CA3	Sun_2	35571	rs2072696	8	86351051	C	G	0.243	-0.18	0.01	4.5e-106	405.09
A4GALT	Pietzner	10708	rs66781836	22	43115519	C	CCTTT	0.47	-0.27	0.01	2.19e-93	406.59
ANGPT2	Sun_2	35571	rs1968586	8	6279511	T	C	0.356	-0.16	0.01	9.46e-86	406.61
EPHA1	Suhre	1000	rs4725617	7	143097100	A	G	0.09	-1.33	0.06	2.9e-80	407.13
SARS2	Pietzner	10708	rs730078	19	39421388	A	G	0.38	0.28	0.01	7.02e-105	407.63
ITGAM	Sun_2	35571	rs11150613	16	31357810	T	C	0.676	0.16	0.01	4.46e-90	408.58
TBC1D23	Sun_2	35571	rs1036770	3	100018715	T	C	0.585	-0.15	0.01	1.56e-81	408.85
EPHB4	Sun_2	35571	rs314361	7	100413005	G	A	0.52	0.15	0.01	3.33e-103	409.49
GPC5	Suhre	1000	rs342706	13	92417058	C	T	0.27	-0.86	0.04	1.2e-83	412.06
DLL1	Sun_2	35571	rs9356631	6	170587470	G	A	0.409	0.15	0.01	2.88e-107	412.44
KYNU	Suhre	1000	rs9013	2	143798189	G	A	0.16	-1.05	0.05	1e-81	414.67
TREM1	Sun_1	3301	rs139121778	6	41245837	AT	A	0.294	0.52	0.03	3.5e-88	417.14
AKR7A3	Pietzner	10708	rs12095284	1	19571849	T	C	0.63	0.28	0.01	4.93e-97	418.29
HEXB	Pietzner	10708	rs13164140	5	74030338	A	G	0.23	0.33	0.02	4.62e-95	418.77
IL15RA	Sun_1	3301	rs8177641	10	6016892	G	A	0.318	0.51	0.03	1.7e-91	419.52
IL11RA	Pietzner	10708	rs11575578	9	34656479	A	G	0.07	0.54	0.03	6.19e-99	420.88
TNFRSF9	Sun_2	35571	rs2493214	1	7994420	G	A	0.19	-0.2	0.01	4.23e-104	421.58
RTBDN	Sun_2	35571	rs7255045	19	12932269	A	G	0.262	-0.17	0.01	6.91e-105	421.8
MSR1	Pietzner	10708	rs41341748	8	16012594	A	G	0.01	-1.38	0.06	4.33e-119	422.04
SORT1	Sun_2	35571	rs61394658	1	109873290	A	G	0.227	-0.18	0.01	6.52e-92	423
AMIGO2	Sun_2	35571	rs215384	12	47760201	G	C	0.411	0.16	0.01	1.1e-84	424.15
ASGR1	Sun_2	35571	rs55714927	17	7080316	T	C	0.195	-0.19	0.01	4.7e-103	425.3
SEZ6L	Sun_2	35571	rs137203	22	26688831	T	G	0.019	-0.56	0.03	2.43e-104	431.3
DLK2	Ferkingstad	35559	rs2125739	6	43412865	C	T	0.247	-0.18	0.01	3.09e-85	433.65
UST	Pietzner	10708	rs11757768	6	149079394	A	G	0.41	0.29	0.01	2.38e-102	437.92
REG1A	Pietzner	10708	rs76841471	2	79330169	T	G	0.92	-0.52	0.03	2.13e-91	438.48
INPP5B	Pietzner	10708	rs61776676	1	38364229	T	C	0.14	-0.41	0.02	1.45e-115	440.25
ADH7	Pietzner	10708	rs146315698	4	100377127	C	CT	0.1	-0.47	0.02	2.42e-98	441.36
COL6A2	Pietzner	10708	rs35548026	21	47552209	A	G	0.09	-0.49	0.02	2.82e-102	443.89
PIGR	Sun_2	35571	rs291102	1	207106478	A	G	0.024	-0.51	0.02	2.28e-101	444
NPY	Sun_2	35571	rs4722337	7	24309098	T	A	0.555	-0.16	0.01	8.27e-113	444.18
SPON2	Pietzner	10708	rs6826705	4	1122634	A	G	0.31	0.31	0.01	8.92e-115	446.75
ADAMTS5	Suhre	1000	rs2830585	21	28305212	T	C	0.16	-1.07	0.04	3.9e-104	447.28
PDLIM4	Pietzner	10708	rs4877	5	131607588	T	G	0.09	-0.5	0.02	1.8e-104	447.65
QDPR	Sun_1	3301	rs28719835	4	17520066	T	C	0.243	-0.57	0.03	1e-94	447.87
YWHAB	Ferkingstad	35559	rs6031847	20	43514203	T	C	0.259	-0.18	0.01	3.24e-87	448.22
CKMT1A_CKMT1B	Sun_2	35571	rs690604	15	43834864	T	G	0.081	-0.29	0.01	1.13e-94	448.36
PFKM	Ferkingstad	35559	rs4760682	12	48512285	C	A	0.193	-0.2	0.01	6.31e-90	448.81
MET	Sun_2	35571	rs1858830	7	116312439	G	C	0.442	-0.16	0.01	3.24e-114	449.23
DBI	Pietzner	10708	rs6733335	2	120142939	C	G	0.8	0.36	0.02	5.27e-125	449.89
ATXN3	Pietzner	10708	rs61988390	14	92476005	A	G	0.67	0.3	0.01	4.55e-110	449.92
THBS2	Sun_1	3301	rs73043857	6	169624900	G	A	0.102	0.81	0.04	6.9e-99	450.68
CD79B	Sun_2	35571	rs12946669	17	62006007	T	C	0.394	-0.16	0.01	1.72e-118	451.46
CREG1	Ferkingstad	35559	rs7513428	1	167515272	T	C	0.154	0.22	0.01	2.24e-82	452.93
CPB2	Suhre	1000	rs3742264	13	46648094	T	C	0.32	0.85	0.04	2.8e-83	456.16
IGFLR1	Sun_1	3301	rs12459634	19	36230174	C	T	0.145	-0.7	0.03	5.8e-100	456.25
GPNMB	Pietzner	10708	rs1881203	7	23292808	T	C	0.62	0.3	0.01	4.46e-105	461.03
PSRC1	Sun_2	35571	rs34863121	1	109823458	T	C	0.013	0.71	0.03	5.84e-103	463.89
AREG	Sun_2	35571	rs1691273	4	75323645	T	C	0.693	-0.18	0.01	4.5e-106	469.62
EGFL7	Sun_2	35571	rs74557797	9	139550503	T	G	0.094	-0.28	0.01	9.63e-101	470.1
TFF1	Pietzner	10708	rs3761376	21	43787038	A	G	0.23	-0.35	0.02	5.47e-111	471.22
SLAMF6	Pietzner	10708	rs11265413	1	160460099	A	T	0.21	-0.36	0.02	4.48e-110	472.72
FKBP1B	Pietzner	10708	rs72781699	2	24277709	A	G	0.2	-0.36	0.02	1.17e-121	474.02
TAFA5	Sun_2	35571	rs79072	22	48767186	T	G	0.715	0.18	0.01	5.51e-89	476.16
ZG16B	Ferkingstad	35559	rs9925556	16	2880105	C	T	0.286	-0.18	0.01	1e-103	476.61
BRSK2	Pietzner	10708	rs7932863	11	1412848	A	G	0.27	0.33	0.01	1.08e-117	477.17
NFASC	Sun_1	3301	rs6667532	1	204948659	G	A	0.105	0.82	0.04	4.1e-100	477.23
SELP	Sun_1	3301	rs6136	1	169563951	G	T	0.108	-0.81	0.04	3e-105	477.38
TNFRSF1B	Ferkingstad	35559	rs2301258	1	12247940	T	C	0.034	-0.45	0.02	5.5e-86	479.35
SEMA3G	Pietzner	10708	rs2016575	3	52477080	T	C	0.18	0.38	0.02	4.41e-107	481.94
KIRREL2	Sun_2	35571	rs404299	19	36349752	A	G	0.033	-0.46	0.02	1.46e-115	484.79
NRP2	Sun_2	35571	rs2289023	2	205986321	G	A	0.227	-0.2	0.01	3.77e-105	485.32
FCN1	Sun_1	3301	rs11103602	9	137854872	A	G	0.258	0.58	0.03	1.5e-106	487.72
ESM1	Sun_2	35571	rs4242051	5	54198775	C	T	0.746	0.19	0.01	2.13e-123	487.85
LILRA5	Sun_1	3301	rs759819	19	54815577	C	T	0.33	-0.54	0.02	2.5e-111	488.36
SEMA4A	Ferkingstad	35559	rs7695	1	156147326	C	T	0.376	0.17	0.01	8.32e-82	489.04
IGDCC4	Pietzner	10708	rs35223184	15	65693258	T	C	0.01	1.49	0.06	3.37e-119	489.49
ST6GAL1	Sun_2	35571	rs4686837	3	186739677	A	G	0.313	-0.18	0.01	1.13e-109	491.19
RNPEP	Pietzner	10708	rs11810017	1	201950949	T	C	0.69	-0.32	0.01	7.09e-122	493.69
CD83	Sun_2	35571	rs12526086	6	14105897	A	G	0.223	0.2	0.01	2.47e-108	494.44
APOE	Pietzner	10708	rs483082	19	45416178	T	G	0.24	-0.35	0.02	7.21e-109	494.84
NECTIN2	Sun_2	35571	rs440277	19	45361224	A	G	0.311	-0.18	0.01	6.9e-111	494.95
LXN	Sun_2	35571	rs6785524	3	158337231	A	C	0.526	-0.17	0.01	2.57e-124	495.6
CD58	Sun_2	35571	rs10801908	1	117090493	T	C	0.12	-0.26	0.01	6.95e-119	496
WWP2	Sun_2	35571	rs72783174	16	69809678	T	C	0.078	-0.31	0.01	5.95e-108	496.46
DTD1	Pietzner	10708	rs59832377	20	18571333	T	C	0.55	0.3	0.01	2.6e-124	499.19
NRP1	Pietzner	10708	rs2506150	10	33483308	A	G	0.36	-0.31	0.01	5.44e-115	499.41
ICOSLG	Sun_1	3301	rs11558819	21	45656774	T	C	0.269	-0.58	0.03	3.5e-108	503
GALNT16	Ferkingstad	35559	rs12100668	14	69793475	G	A	0.408	-0.17	0.01	7.24e-91	503.31
NFU1	Pietzner	10708	rs74637005	2	69650730	A	G	0.04	-0.77	0.04	5.95e-106	505.21
IL6ST	Sun_2	35571	rs11739016	5	55263373	T	C	0.119	0.26	0.01	1.4e-122	505.56
CD1C	Sun_2	35571	rs115248892	1	158262619	T	G	0.003	-1.62	0.07	5.46e-125	508.01
ESAM	Pietzner	10708	rs12792040	11	124624150	A	G	0.09	-0.53	0.02	1.5e-120	510.25
CRABP2	Pietzner	10708	rs3806412	1	156676553	T	G	0.61	0.31	0.01	9.18e-119	512.98
IL1R1	Sun_2	35571	rs3917238	2	102773083	T	C	0.301	-0.18	0.01	4.66e-117	513.76
CPA1	Sun_2	35571	rs13226219	7	130019491	C	T	0.129	0.25	0.01	3.77e-116	514.25
LAMA4	Sun_2	35571	rs7765769	6	112459550	C	T	0.443	0.17	0.01	2.78e-130	514.7
AXL	Sun_2	35571	rs66841352	19	41739180	C	G	0.402	-0.17	0.01	7.51e-135	519.3
SHBG	Ferkingstad	35559	rs858519	17	7531965	T	C	0.47	-0.17	0.01	9.55e-95	519.43
KLK14	Sun_1	3301	rs2569491	19	51584916	A	G	0.3	0.57	0.02	3.6e-119	521.31
SPINT1	Ferkingstad	35559	rs17658212	15	41145919	T	C	0.048	-0.4	0.02	5.62e-94	522.36
ANXA4	Pietzner	10708	rs2228203	2	70033584	T	C	0.19	-0.39	0.02	5.37e-140	523.01
GPA33	Sun_2	35571	rs72689400	1	167038219	A	C	0.016	-0.67	0.03	1.18e-127	524.25
CNPY4	Sun_2	35571	rs7457787	7	99777869	C	A	0.115	-0.27	0.01	1.13e-109	524.94
C6	Pietzner	10708	rs181908440	5	41210195	A	T	0.01	-1.54	0.06	3.7e-149	526.06
CCL5	Sun_2	35571	rs2107538	17	34207780	T	C	0.181	-0.22	0.01	3.43e-109	526.27
MANBA	Sun_1	3301	rs227370	4	103612043	C	T	0.675	-0.56	0.02	7.8e-113	526.34
FSTL1	Pietzner	10708	rs1147707	3	120169248	T	C	0.39	-0.31	0.01	3.59e-114	526.96
ECM1	Suhre	1000	rs13294	1	150484987	A	G	0.4	-0.85	0.04	7.7e-102	527.96
LRPAP1	Pietzner	10708	rs1800493	4	3516559	T	C	0.02	-1.1	0.05	2.83e-98	528.02
LAG3	Sun_2	35571	rs3782735	12	6885076	A	G	0.603	0.18	0.01	6.11e-138	529.44
AGRN	Pietzner	10708	rs3128125	1	961464	T	G	0.35	-0.32	0.02	9.84e-109	530.08
NPNT	Ferkingstad	35559	rs34712979	4	106819053	A	G	0.244	-0.2	0.01	2.04e-100	532.58
KLRB1	Pietzner	10708	rs4763630	12	9741500	A	G	0.59	0.31	0.01	3.34e-125	532.68
FAS	Pietzner	10708	rs7911226	10	90768965	A	G	0.69	0.33	0.01	5.92e-131	533.17
SDF2	Pietzner	10708	rs704	17	26694861	A	G	0.47	0.31	0.01	8.08e-120	534.7
SCLY	Sun_2	35571	rs62196005	2	239007130	T	A	0.275	0.19	0.01	1.37e-128	536.15
RAB31	Pietzner	10708	rs12607866	18	9696474	T	C	0.73	-0.35	0.01	3.64e-134	536.72
TCEA2	Pietzner	10708	rs34848242	20	62698188	A	G	0.33	-0.33	0.01	5.6e-134	538.19
NCAN	Ferkingstad	35559	rs2228603	19	19329924	T	C	0.074	-0.33	0.02	6.46e-94	538.71
IL18R1	Suhre	1000	rs2058622	2	102985424	A	G	0.23	1	0.04	9e-108	538.96
CREB3L4	Pietzner	10708	rs11288257	1	153940144	G	GA	0.48	0.31	0.01	1.94e-123	539.48
AFM	Pietzner	10708	rs72856641	4	74359582	T	C	0.98	1.11	0.05	2.75e-125	541.27
NELL2	Sun_2	35571	rs142457851	12	45393372	CAACTGAATTGTGA	C	0.603	-0.18	0.01	4.59e-141	541.79
COL4A1	Sun_2	35571	rs652572	13	110819457	G	A	0.66	0.18	0.01	8.24e-116	542.44
WARS	Pietzner	10708	rs4905957	14	100837230	T	C	0.75	0.36	0.02	1.04e-131	543.7
FUT5	Sun_1	3301	rs778809	19	5830302	A	G	0.301	-0.58	0.03	1.3e-118	544
SERPING1	Suhre	1000	rs11603020	11	57374332	C	T	0.28	-0.94	0.04	5e-96	545.08
CA14	Sun_2	35571	rs1122967	1	150258838	G	C	0.51	0.17	0.01	2.16e-136	546.48
EPHB6	Pietzner	10708	rs7789303	7	142552547	A	G	0.73	0.35	0.01	4.94e-138	546.49
CAPN2	Ferkingstad	35559	rs150394890	1	223864380	T	G	0.013	-0.78	0.04	2.75e-96	546.55
IFNGR1	Sun_2	35571	rs11754268	6	137540335	T	C	0.214	-0.21	0.01	1.1e-122	546.61
COL10A1	Pietzner	10708	rs34224224	6	116464219	A	T	0.73	0.35	0.02	4.54e-127	549.76
PI3	Pietzner	10708	rs35615384	20	43787352	A	AT	0.18	0.41	0.02	2.78e-127	550.44
MAP4K5	Sun_2	35571	rs17780143	14	50901768	A	G	0.057	-0.38	0.02	4.08e-122	550.76
GDF15	Yao	6861	rs35911336	19	18481825	A	G	0.833	-0.52	0.03	1.04e-71	553.36
CST4	Pietzner	10708	rs7263473	20	23690467	A	G	0.11	-0.5	0.02	4.36e-130	555.68
GLT8D2	Sun_2	35571	rs117801489	12	104408832	C	T	0.017	0.68	0.03	7.79e-120	556.47
SPINT3	Sun_1	3301	rs6017591	20	44141041	C	T	0.541	0.54	0.02	6e-127	558.67
CD7	Pietzner	10708	rs3176831	17	80272491	T	C	0.04	-0.8	0.03	4.62e-145	559.26
GCKR	Pietzner	10708	rs1260326	2	27730940	T	C	0.4	-0.32	0.01	7.31e-128	560.73
FAH	Sun_1	3301	rs11555096	15	80472526	T	C	0.021	-1.88	0.08	1.9e-121	560.96
ANGPT1	Sun_2	35571	rs6993770	8	106581528	T	A	0.287	-0.2	0.01	3.15e-131	562.28
CR2	Sun_2	35571	rs61821111	1	207595899	C	T	0.114	-0.28	0.01	6.37e-141	563.23
GHR	Ferkingstad	35559	rs4610468	5	42634221	C	T	0.23	-0.21	0.01	2.34e-102	563.87
ASAH2	Sun_1	3301	rs10740617	10	52027609	C	A	0.794	0.67	0.03	2e-124	567.84
ARG1	Sun_2	35571	rs2781668	6	131897278	T	C	0.166	-0.24	0.01	3.34e-125	567.87
NMRK1	Pietzner	10708	rs11144225	9	77707300	A	T	0.6	0.32	0.01	2.6e-133	568.08
APOF	Ferkingstad	35559	rs2020854	12	56743367	C	T	0.09	-0.31	0.01	3.24e-102	569.24
CTSO	Sun_2	35571	rs2334114	4	156856193	A	C	0.213	-0.22	0.01	1.91e-128	570.14
MPPED2	Pietzner	10708	rs11031140	11	30608133	A	G	0.2	-0.4	0.02	1.54e-130	571.66
DDX58	Pietzner	10708	rs7025666	9	32533829	T	C	0.74	0.36	0.02	1.67e-132	571.84
ASRGL1	Pietzner	10708	rs11231069	11	62152807	A	T	0.72	0.36	0.01	4.24e-140	573.13
NUB1	Sun_2	35571	rs113920358	7	151038887	T	C	0.129	-0.27	0.01	3.46e-129	575.08
SERPINB13	Ferkingstad	35559	rs77157727	18	61253961	A	G	0.043	-0.44	0.02	3.63e-110	575.73
RNASE2	Pietzner	10708	rs2233859	14	21359808	A	C	0.43	0.32	0.01	9.11e-126	577.04
PIK3AP1	Sun_2	35571	rs41317268	10	98469114	G	A	0.195	-0.23	0.01	3.76e-139	579.2
HYOU1	Sun_2	35571	rs2509121	11	118928253	T	C	0.401	0.18	0.01	1.19e-150	581.4
IL1RN	Folkersen	30000	rs6734238	2	113841030	A	G	0.61	0.2	0.01	5.51e-89	582
COCH	Pietzner	10708	rs28400019	14	31343494	A	G	0.12	0.5	0.02	2.21e-126	584.26
GZMB	Sun_1	3301	rs8192917	14	25102160	T	C	0.787	-0.67	0.03	7.2e-124	584.46
ANTXR2	Ferkingstad	35559	rs7674623	4	80794681	T	C	0.213	0.22	0.01	1.32e-100	586.9
GMPR2	Pietzner	10708	rs34354104	14	24707479	A	G	0.05	-0.74	0.03	1.15e-141	589.19
CXCL6	Suhre	1000	rs16850073	4	74703999	T	C	0.38	0.89	0.04	9.7e-98	590.06
CD177	Sun_1	3301	rs73554000	19	43825494	C	G	0.024	1.8	0.08	4.4e-116	590.36
RAB6B	Pietzner	10708	rs10212397	3	133607140	A	G	0.15	-0.45	0.02	8.62e-149	591.16
PKLR	Sun_2	35571	rs77350683	1	155484430	C	T	0.068	-0.36	0.02	5.59e-128	594.93
CST6	Sun_2	35571	rs12576095	11	65776305	A	G	0.024	0.59	0.02	4.52e-147	597.83
AFP	Sun_2	35571	rs12506899	4	74319283	G	T	0.397	-0.19	0.01	1.45e-155	598.98
CCDC126	Pietzner	10708	rs35121828	7	23634985	A	G	0.25	0.38	0.02	1.29e-140	599.37
PLAUR	Ferkingstad	35559	rs2302524	19	44156472	C	T	0.175	-0.24	0.01	3.31e-113	602.49
AKR1A1	Sun_1	3301	rs72688441	1	46051053	A	G	0.059	-1.18	0.05	1.2e-126	603.34
LAMC2	Sun_1	3301	rs2276543	1	183155305	A	G	0.279	0.62	0.03	4.4e-133	603.53
ADGRE5	Sun_2	35571	rs139113505	19	14499616	T	C	0.017	-0.71	0.03	1.13e-140	604.31
PSMB1	Pietzner	10708	rs17860826	6	170888362	G	GA	0.41	-0.33	0.01	7.39e-150	606.92
PGP	Pietzner	10708	rs116977380	16	2263836	T	C	0.04	0.84	0.03	1.23e-141	607.24
SIRPG	Pietzner	10708	rs6043409	20	1616206	A	G	0.35	-0.34	0.01	4.01e-132	609.25
AHSG	Sun_1	3301	rs35094235	3	186328951	G	T	0.731	0.63	0.03	2e-132	610.19
CKAP4	Sun_2	35571	rs2704895	12	106649988	A	G	0.222	0.22	0.01	3.77e-133	610.79
SH3BGRL3	Pietzner	10708	rs4659424	1	26622993	T	C	0.07	-0.64	0.03	4.67e-152	611.11
TNFSF10	Sun_2	35571	rs79287178	3	172294500	A	G	0.03	-0.54	0.02	3.17e-144	613.13
ROBO1	Sun_2	35571	rs3773244	3	78784770	A	G	0.197	0.23	0.01	1.57e-146	615.72
TYMP	Sun_2	35571	rs131805	22	50964153	C	T	0.783	0.22	0.01	9.82e-137	617.42
CSF1	Sun_2	35571	rs11577194	1	110500175	C	T	0.525	-0.19	0.01	6.43e-154	617.75
SFRP1	Sun_2	35571	rs72643819	8	41167193	T	G	0.387	-0.19	0.01	3.07e-162	619.66
GIF	Ferkingstad	35559	rs7938323	11	60969799	G	A	0.388	-0.19	0.01	5.25e-117	620.12
IDH1	Ferkingstad	35559	rs34599179	2	209108301	C	T	0.008	-1.07	0.05	1.66e-115	624.87
HAVCR2	Sun_1	3301	rs6874178	5	156530149	T	A	0.817	-0.73	0.03	1e-145	625.34
NOG	Pietzner	10708	rs76164057	17	54840864	A	G	0.99	-1.67	0.06	3.1e-170	627.33
CPQ	Pietzner	10708	rs148684432	8	98041637	A	G	0.01	-1.67	0.06	1.64e-154	628.12
GXYLT1	Pietzner	10708	rs139695917	12	42527041	T	C	0.99	-1.67	0.06	1.61e-168	628.12
LACTB2	Sun_2	35571	rs191588099	8	71529866	A	G	0.007	-1.11	0.05	7.08e-129	629.97
ETFA	Pietzner	10708	rs79495512	15	76492337	T	C	0.91	-0.58	0.02	2e-142	631.18
RNASE3	Pietzner	10708	rs147307766	14	21385991	T	C	0.05	0.77	0.03	4.24e-140	632
PFKFB2	Sun_2	35571	rs1560	1	207250631	G	A	0.482	-0.19	0.01	3.21e-157	632.15
GZMH	Sun_2	35571	rs190749747	14	25076303	G	C	0.011	-0.89	0.04	7.81e-136	633.8
NUDT2	Pietzner	10708	rs4879779	9	34366134	A	C	0.21	-0.41	0.02	4.9e-171	635.68
PDE5A	Pietzner	10708	rs59867181	4	120556467	T	C	0.62	-0.35	0.01	1.27e-162	636.12
B4GALT2	Pietzner	10708	rs3762423	1	44445667	T	C	0.94	0.71	0.03	4.51e-138	637.79
UROS	Ferkingstad	35559	rs1935451	10	127505426	G	A	0.11	0.3	0.01	2.34e-114	639.38
CES3	Sun_2	35571	rs71647892	16	66997756	C	T	0.013	-0.85	0.03	6e-145	639.78
SPOCK3	Pietzner	10708	rs62353586	4	168139859	A	G	0.02	1.2	0.05	1.41e-152	641.62
REG3A	Sun_2	35571	rs147616162	2	79395511	A	T	0.059	0.4	0.02	1.15e-156	642.31
CLEC4G	Sun_2	35571	rs76560987	19	7799452	T	C	0.071	0.37	0.01	1.83e-151	643.42
NTRK3	Sun_2	35571	rs28735437	15	88514855	C	G	0.14	0.27	0.01	6.49e-163	644.38
RSPO3	Pietzner	10708	rs4644087	6	127481154	A	C	0.45	-0.34	0.01	5.75e-158	645.75
NME4	Pietzner	10708	rs6600214	16	444814	T	C	0.33	0.36	0.01	8.15e-162	647.02
CCL26	Sun_2	35571	rs41463245	7	75401263	T	C	0.009	-1.01	0.04	5.22e-147	647.9
MAN1A2	Ferkingstad	35559	rs73013841	1	117854911	T	C	0.112	-0.3	0.01	7.76e-110	648.15
IMPAD1	Pietzner	10708	rs112433249	8	57876576	T	C	0.99	1.7	0.06	1e-156	648.18
CST3	Pietzner	10708	rs734801	20	23612791	A	G	0.77	0.4	0.02	6.7e-155	650.02
SERPINA5	Pietzner	10708	rs6119	14	95054012	A	G	0.9	-0.56	0.02	6.86e-150	650.23
WIF1	Sun_2	35571	rs462010	12	65338145	A	G	0.445	-0.19	0.01	6.27e-164	652.71
MANSC1	Pietzner	10708	rs56829405	12	12496935	A	G	0.12	0.52	0.02	2.53e-152	653.74
CHMP2B	Pietzner	10708	rs9822911	3	87318758	T	C	0.59	-0.35	0.01	6.61e-170	658.2
SOD3	Sun_1	3301	rs1799895	4	24801834	G	C	0.016	2.3	0.09	3.5e-140	659.35
FKBP5	Sun_2	35571	rs2817032	6	35688619	C	T	0.287	0.21	0.01	2.65e-153	659.98
CNDP1	Pietzner	10708	rs17817077	18	72209543	A	G	0.39	0.35	0.01	4.12e-145	666.65
GRAMD1C	Sun_1	3301	rs61077924	3	113625933	G	C	0.324	0.62	0.02	3.4e-148	667.98
ACAT1	Pietzner	10708	rs112087419	11	107998126	A	G	0.18	0.45	0.02	2.02e-157	674.26
CA1	Ferkingstad	35559	rs117634905	8	86541976	G	A	0.008	-1.09	0.05	1.02e-126	674.77
PECR	Pietzner	10708	rs7600044	2	216905927	A	G	0.1	-0.57	0.02	1.04e-172	674.96
CD28	Sun_2	35571	rs7369876	2	204636472	T	C	0.831	0.26	0.01	8.87e-147	676.7
ALKBH3	Pietzner	10708	rs2434484	11	43949008	T	G	0.66	0.36	0.01	2.67e-165	676.87
PZP	Pietzner	10708	rs1035849	12	9362168	T	C	0.33	-0.37	0.01	1e-200	681.96
CNTFR	Ferkingstad	35559	rs10972159	9	34593086	A	G	0.031	-0.56	0.02	8.32e-125	684.95
IDUA	Sun_1	3301	rs3822020	4	985727	G	A	0.637	0.61	0.02	7.2e-148	685.69
C4BPA	Pietzner	10708	rs34101855	1	207281706	A	AG	0.87	-0.52	0.02	1.25e-151	686.11
CCL27	Sun_2	35571	rs2070074	9	34649442	G	A	0.097	-0.33	0.01	1.74e-165	688.78
SFRP4	Ferkingstad	35559	rs2598105	7	37977116	T	C	0.155	0.27	0.01	1.29e-123	692.59
IMPA1	Sun_2	35571	rs1967328	8	82583771	T	G	0.297	-0.21	0.01	1.23e-157	693.88
TFF3	Sun_2	35571	rs118095917	21	43733628	T	C	0.006	-1.25	0.05	2.77e-169	696.05
COMP	Sun_2	35571	rs12974746	19	18906548	G	A	0.03	-0.58	0.02	4.62e-165	697.86
CELA3A	Sun_2	35571	rs34262568	1	22313371	A	G	0.231	0.23	0.01	1.73e-186	699.97
CGA_CGB7_CGB5_CGB3_CGB8	Sun_1	3301	rs79785970	19	49517331	G	C	0.077	1.11	0.04	1e-148	700.43
SAA2	Pietzner	10708	rs11024589	11	18278423	A	C	0.91	0.61	0.02	2.17e-164	702.18
CTRB1	Sun_1	3301	rs8051363	16	75255217	G	A	0.704	0.65	0.02	1.6e-157	705.05
THG1L	Pietzner	10708	rs2270812	5	157164962	T	C	0.35	-0.37	0.01	1.26e-165	707.08
AZGP1	Pietzner	10708	rs2527896	7	99537653	A	G	0.71	0.39	0.01	1.91e-165	707.57
MGAT4B	Pietzner	10708	rs113756550	5	179228377	A	G	0.02	-1.26	0.04	2.41e-198	714.11
PRTFDC1	Sun_2	35571	rs143356584	10	25241502	T	C	0.014	-0.85	0.03	6.57e-157	715.14
SCGB3A2	Sun_2	35571	rs17717320	5	147205914	G	C	0.198	-0.25	0.01	1.76e-168	715.29
PTS	Sun_2	35571	rs12796145	11	112076587	C	G	0.233	-0.24	0.01	2.73e-150	716.44
BOC	Ferkingstad	35559	rs4682481	3	112983855	T	C	0.163	0.27	0.01	3.24e-128	722.37
XXYLT1	Ferkingstad	35559	rs12695049	3	194988940	C	T	0.467	-0.2	0.01	6.92e-127	722.43
POGLUT1	Pietzner	10708	rs115630304	3	119136267	C	G	0.93	-0.7	0.03	1.99e-177	722.9
PSAP	Pietzner	10708	rs2394843	10	73598191	A	G	0.54	-0.36	0.01	5.4e-165	723.69
CLIC5	Pietzner	10708	rs35822882	6	45916999	T	G	0.03	-1.05	0.04	1.41e-189	726.61
FABP2	Sun_2	35571	rs17009129	4	120280617	T	C	0.325	-0.21	0.01	1.23e-157	729.58
IGF2R	Sun_1	3301	rs629849	6	160494409	G	A	0.871	0.9	0.03	9.5e-163	734.11
PPP1R14A	Pietzner	10708	rs4803999	19	38787965	A	G	0.71	0.4	0.01	1.81e-178	735.1
MFAP4	Ferkingstad	35559	rs139356332	17	19289286	C	G	0.025	-0.65	0.03	1.74e-130	735.86
PGM2	Ferkingstad	35559	rs187076049	4	37848578	G	A	0.005	1.4	0.05	1.12e-149	735.95
CD209	Pietzner	10708	rs4804774	19	7772173	C	G	0.24	-0.42	0.02	1.16e-151	736.32
MPI	Sun_2	35571	rs4886632	15	75173925	T	G	0.577	0.21	0.01	1.58e-188	745.14
SPON1	Pietzner	10708	rs1969539	11	14038621	A	G	0.49	0.36	0.01	9.02e-192	745.91
NTN1	Pietzner	10708	rs9897200	17	8985510	T	G	0.11	-0.58	0.02	1.26e-184	749.34
MASP1	Sun_2	35571	rs698090	3	186964300	T	C	0.644	0.21	0.01	3.49e-156	755.37
CXCL1	Suhre	1000	rs3117600	4	74731812	G	A	0.3	1.01	0.04	3.2e-120	755.93
ISLR2	Sun_2	35571	rs34868798	15	74469716	C	T	0.224	0.25	0.01	1.22e-207	763.4
ITGA11	Sun_2	35571	rs2306022	15	68628163	T	C	0.09	-0.36	0.01	7.27e-168	767.86
HS6ST1	Sun_2	35571	rs6761320	2	129050354	T	C	0.428	-0.21	0.01	5.02e-194	769.87
CD5L	Pietzner	10708	rs2765501	1	157804648	A	G	0.41	0.37	0.01	1.69e-166	772.63
GM2A	Pietzner	10708	rs35654352	5	150648242	C	CA	0.65	-0.39	0.01	4.91e-168	774.26
MAPK12	Pietzner	10708	rs9617128	22	50704267	T	C	0.76	-0.43	0.02	2.53e-192	774.37
CTSV	Sun_2	35571	rs12686511	9	99909044	T	C	0.207	0.26	0.01	1.34e-176	774.75
TNFRSF8	Sun_2	35571	rs35249183	1	12099345	G	A	0.1	0.35	0.01	9.06e-182	779.44
CCL13	Sun_2	35571	rs3136674	17	32682616	C	T	0.054	-0.46	0.02	2.46e-183	792.95
ACADSB	Pietzner	10708	rs7913063	10	124798683	A	T	0.91	-0.65	0.02	2.59e-188	803.92
PRSS27	Sun_2	35571	rs71386687	16	2767894	T	G	0.083	0.38	0.01	8.64e-190	805.32
PCOLCE2	Pietzner	10708	rs11716897	3	142605556	A	G	0.34	0.4	0.01	3.64e-192	806.13
NFKBIE	Sun_2	35571	rs28362856	6	44234539	C	G	0.043	-0.52	0.02	3.3e-184	814.62
PLAT	Ferkingstad	35559	rs2020921	8	42044965	A	G	0.033	-0.59	0.02	3.63e-144	817.57
CHST11	Pietzner	10708	rs61022741	12	104981678	G	GT	0.48	-0.38	0.01	6.26e-189	817.61
ITGA6	Sun_2	35571	rs6714597	2	173338486	C	T	0.308	0.23	0.01	9.06e-182	820.27
IL12B_IL23A	Pietzner	10708	rs4244437	5	158773117	A	G	0.69	0.41	0.01	2.86e-197	820.87
MUC13	Sun_2	35571	rs1127233	3	124627024	G	T	0.262	0.24	0.01	5.22e-201	823.8
MYOC	Pietzner	10708	rs7547721	1	171617765	A	G	0.09	-0.66	0.02	9.99e-197	830.66
CRLF1	Ferkingstad	35559	rs7246833	19	18715082	G	C	0.216	0.26	0.01	6.17e-164	832.31
FAP	Sun_2	35571	rs4664454	2	163071161	G	C	0.01	1.07	0.04	1.73e-194	834.97
FABP1	Sun_2	35571	rs2241883	2	88424066	C	T	0.307	-0.23	0.01	1.73e-186	840.92
DSC2	Sun_2	35571	rs4799305	18	28689144	A	G	0.885	-0.34	0.01	4.02e-206	844.31
APBB1IP	Sun_2	35571	rs2992335	10	26727934	G	C	0.601	-0.22	0.01	1.76e-166	845.56
TGFB1	Sun_2	35571	rs73045269	19	41825191	T	C	0.171	0.29	0.01	6.72e-180	846.06
GFRA1	Sun_2	35571	rs11197603	10	118001771	C	T	0.148	-0.31	0.01	2.61e-204	855.48
SETMAR	Sun_2	35571	rs35083095	3	4403818	C	T	0.494	-0.22	0.01	5.39e-211	857.52
MATN4	Ferkingstad	35559	rs9784191	20	43939090	G	A	0.255	-0.25	0.01	1.15e-160	865.13
RSPO1	Sun_2	35571	rs36043533	1	38079517	G	T	0.057	0.47	0.02	2.88e-191	868.35
DPP4	Sun_2	35571	rs13015258	2	162930725	G	T	0.621	-0.23	0.01	1.11e-226	868.58
PGLYRP2	Pietzner	10708	rs10164310	19	15585945	A	G	0.16	-0.53	0.02	6.49e-195	870.82
CLEC11A	Pietzner	10708	rs116924815	19	51230733	T	C	0.03	1.14	0.04	1.37e-177	874.36
AMY2A	Pietzner	10708	rs78245241	1	104335726	T	G	0.97	1.14	0.04	1.53e-194	874.36
LILRA4	Pietzner	10708	rs2241384	19	54849942	A	G	0.17	-0.52	0.02	2.66e-198	877.08
CYB5D2	Pietzner	10708	rs118123280	17	4060233	A	G	0.02	-1.39	0.05	6.79e-156	877.3
DSG2	Sun_2	35571	rs2704053	18	29095089	G	A	0.476	-0.22	0.01	8.24e-217	880.03
C1QTNF9	Pietzner	10708	rs9511206	13	24932444	T	G	0.68	0.42	0.01	3.67e-192	881.08
FCN2	Pietzner	10708	rs57136797	9	137752540	A	T	0.85	0.55	0.02	1.31e-188	884.32
SFTPA1	Sun_2	35571	rs1965708	10	81317045	T	G	0.187	-0.28	0.01	3.46e-176	886.67
GLB1	Sun_2	35571	rs7637133	3	33138763	A	C	0.616	0.23	0.01	1.09e-230	888.76
ADSSL1	Pietzner	10708	rs72715968	14	105186178	A	T	0.79	-0.48	0.02	1e-200	890.19
SCARB2	Sun_2	35571	rs28563976	4	77097373	C	A	0.146	-0.31	0.01	4.67e-215	890.2
LAMP3	Sun_2	35571	rs11921884	3	182828245	T	G	0.65	0.23	0.01	7.18e-241	892.83
FCGR2A_FCGR2B	Suhre	1000	rs17413015	1	161644811	T	C	0.15	1.36	0.05	9.2e-137	893.38
EGFLAM	Ferkingstad	35559	rs113400125	5	38406251	T	C	0.027	0.69	0.03	1.07e-149	895.44
BLVRB	Sun_2	35571	rs149698066	19	40964064	A	G	0.006	-1.45	0.05	1.2e-170	896.88
GNMT	Pietzner	10708	rs6458314	6	42922215	A	C	0.59	-0.4	0.01	5.49e-198	898.26
MCF2L	Pietzner	10708	rs3011487	13	113578421	T	C	0.59	-0.4	0.01	1e-200	898.26
TIMD4	Sun_2	35571	rs4704826	5	156392082	A	C	0.638	-0.23	0.01	8.12e-239	898.42
PLA2G15	Sun_2	35571	rs7672	16	68294800	G	C	0.715	-0.25	0.01	1.22e-207	900.21
LGALS7B_LGALS7	Sun_2	35571	rs6508818	19	39277154	G	A	0.579	0.23	0.01	1.11e-226	900.32
CALCB	Ferkingstad	35559	rs10766205	11	15092320	G	A	0.275	-0.25	0.01	6.61e-179	909.43
SERPINA3	Pietzner	10708	rs8023057	14	95097556	A	G	0.82	0.52	0.02	7.36e-200	917.11
F13B	Pietzner	10708	rs2298882	1	197034826	T	G	0.52	0.4	0.01	1e-200	919.27
MGP	Pietzner	10708	rs2430687	12	15047396	T	C	0.6	0.41	0.01	1e-200	919.85
COL18A1	Pietzner	10708	rs144147445	21	46930092	A	G	0.02	-1.43	0.05	2.18e-187	937.24
GRHPR	Pietzner	10708	rs4878690	9	37422656	T	C	0.33	0.43	0.01	1e-200	938.88
BCAN	Sun_2	35571	rs2365715	1	156615114	G	A	0.39	-0.23	0.01	1.73e-186	942.87
PLXDC1	Sun_2	35571	rs62076601	17	37223409	T	C	0.049	-0.53	0.02	1.01e-187	945.19
CDCP1	Sun_2	35571	rs2276862	3	45187785	G	C	0.172	-0.3	0.01	7.47e-247	947.3
ANGPTL1	Pietzner	10708	rs4548397	1	178523947	T	C	0.47	0.4	0.01	1e-200	947.6
BPHL	Pietzner	10708	rs3799219	6	3151103	A	G	0.95	-0.93	0.03	1e-200	951.69
LGMN	Sun_2	35571	rs148659834	14	93176042	A	G	0.012	-1.04	0.03	2.45e-216	952.42
PODXL	Sun_2	35571	rs3212298	7	131193739	T	C	0.044	-0.56	0.02	3.02e-210	953.25
KNG1	Pietzner	10708	rs76438938	3	186461524	T	C	0.03	-1.19	0.04	1e-200	961.61
DPP6	Sun_2	35571	rs3734960	7	154684153	C	T	0.262	0.26	0.01	1.81e-233	962.11
RGMA	Sun_2	35571	rs3752102	15	93616014	A	C	0.468	-0.23	0.01	9.01e-237	962.29
WFDC1	Pietzner	10708	rs400345	16	84328494	T	C	0.18	-0.53	0.02	1e-200	964.05
PLXNA1	Ferkingstad	35559	rs4679138	3	126711070	G	A	0.304	-0.25	0.01	2.95e-182	965.22
GATM	Pietzner	10708	rs2433601	15	45716425	T	C	0.63	0.42	0.01	1e-200	969.32
GDNF	Sun_2	35571	rs62360373	5	37820741	A	G	0.095	-0.39	0.01	9.34e-201	971.33
GP2	Sun_2	35571	rs1129818	16	20328685	C	T	0.456	-0.23	0.01	7.18e-241	976.02
IL32	Sun_2	35571	rs45499297	16	3115272	C	T	0.094	-0.4	0.01	8.12e-239	978.04
ADAMTSL1	Ferkingstad	35559	rs702208	9	18639743	G	A	0.047	0.55	0.02	1.45e-173	986.26
MCL1	Pietzner	10708	rs190596489	1	150562043	A	C	0.98	1.47	0.05	1.19e-167	989.33
C7	Pietzner	10708	rs74480769	5	40972211	A	G	0.97	1.21	0.04	1e-200	993.64
ADIPOQ	Ferkingstad	35559	rs143257534	3	186551888	T	C	0.034	-0.64	0.02	1.86e-154	994.61
BCAM	Sun_2	35571	rs28399654	19	45316588	A	G	0.033	-0.65	0.02	2.09e-232	994.76
NINJ1	Sun_2	35571	rs11379524	9	95882745	AC	A	0.63	0.24	0.01	5.22e-201	998.84
PSAPL1	Pietzner	10708	rs4484302	4	7436997	T	C	0.83	-0.55	0.02	1e-200	999.22
TNFRSF19	Sun_2	35571	rs61947047	13	24153909	T	C	0.309	0.25	0.01	1.67e-219	999.76
ST3GAL1	Sun_2	35571	rs9643300	8	134503148	T	C	0.565	-0.24	0.01	3.57e-249	1001.25
PDGFD	Pietzner	10708	rs7115797	11	104028877	A	G	0.29	-0.46	0.01	1e-200	1007.4
CPE	Sun_2	35571	rs1550270	4	166261800	C	T	0.3	0.26	0.01	1.09e-224	1007.54
CCN3	Sun_2	35571	rs2279112	8	120429024	A	G	0.259	-0.27	0.01	7.23e-248	1015.62
DEFB1	Pietzner	10708	rs2741117	8	6725969	T	G	0.52	0.42	0.01	1e-200	1017.68
THBS4	Sun_2	35571	rs2438632	5	79392193	T	G	0.398	0.24	0.01	9.42e-260	1018.56
DSG3	Sun_2	35571	rs7234091	18	29019829	T	C	0.181	-0.31	0.01	5.05e-255	1022.47
CCBL2	Pietzner	10708	rs1409152	1	89418403	T	C	0.5	-0.42	0.01	1e-200	1024.83
CHGA	Ferkingstad	35559	rs729940	14	93399101	T	C	0.142	-0.34	0.01	1.62e-184	1028.75
CD46	Ferkingstad	35559	rs10746399	1	207944072	T	C	0.453	0.24	0.01	3.16e-189	1044.65
THOP1	Sun_2	35571	rs2741990	19	2796644	T	C	0.293	0.26	0.01	5e-237	1049.37
GGT1	Sun_2	35571	rs2006227	22	24995756	A	C	0.338	0.25	0.01	2.72e-288	1056.99
ENPP2	Sun_2	35571	rs13267597	8	120654225	G	T	0.327	-0.26	0.01	0	1064.47
CD22	Sun_2	35571	rs10411704	19	35800662	T	G	0.786	-0.29	0.01	4.65e-234	1066.73
GSTA1	Pietzner	10708	rs6458869	6	52630269	A	C	0.64	0.44	0.01	1e-200	1069.71
UROD	Pietzner	10708	rs8681	1	45468606	A	G	0.25	-0.49	0.02	1e-200	1073.64
CNTN4	Sun_2	35571	rs163352	3	3098041	C	G	0.815	-0.31	0.01	2.51e-263	1077.52
LGALS3	Pietzner	10708	rs76424323	14	55612573	A	G	0.92	0.79	0.02	1e-200	1086.05
NCR1	Sun_2	35571	rs7255591	19	55416170	C	G	0.089	-0.43	0.01	1.03e-237	1087.78
CRH	Sun_2	35571	rs59104426	8	67172949	A	T	0.033	-0.68	0.02	2.23e-253	1094.65
DCBLD2	Sun_2	35571	rs12487717	3	98605007	A	G	0.013	-1.07	0.03	4.82e-246	1097.73
GGH	Pietzner	10708	rs12676348	8	63943175	T	C	0.94	-0.91	0.03	1e-200	1097.74
GNPTG	Pietzner	10708	rs4984644	16	1407792	T	C	0.08	0.8	0.02	1e-200	1107.35
POMGNT2	Pietzner	10708	rs4683355	3	43145671	T	C	0.49	-0.43	0.01	1e-200	1112.61
ACAT2	Pietzner	10708	rs25683	6	160196343	A	G	0.43	0.44	0.01	1e-200	1116.93
CXCL5	Pietzner	10708	rs352045	4	74864687	T	G	0.12	0.67	0.02	1e-200	1117.63
ATRN	Pietzner	10708	rs118065662	20	3562866	A	G	0.99	2.19	0.06	1e-200	1119.95
NADK	Sun_2	35571	rs17162854	1	1693726	G	A	0.516	0.25	0.01	6.2e-275	1127.36
ADGRE2	Sun_2	35571	rs7251607	19	14506991	C	A	0.753	0.29	0.01	8.37e-284	1133.96
APOL1	Pietzner	10708	rs9610469	22	36653752	C	G	0.69	0.47	0.01	1e-200	1138.45
IL22RA1	Sun_2	35571	rs7355101	1	24451085	T	A	0.195	-0.32	0.01	2.25e-268	1145.04
CDH17	Ferkingstad	35559	rs7833351	8	95182178	G	A	0.312	0.27	0.01	1e-200	1148.36
TP53I3	Pietzner	10708	rs1134516	2	24342532	A	G	0.16	-0.6	0.02	0	1151.23
WFIKKN1	Sun_2	35571	rs55798945	16	669708	G	T	0.304	0.27	0.01	3.14e-255	1158.98
PADI4	Sun_2	35571	rs2240336	1	17674402	T	C	0.415	-0.26	0.01	5.93e-223	1159.21
MFAP2	Pietzner	10708	rs4920605	1	17315425	A	G	0.56	0.45	0.01	1e-200	1169.31
C1RL	Pietzner	10708	rs191448232	12	7254686	C	G	0.01	-2.23	0.06	1e-200	1171.61
KDELC2	Pietzner	10708	rs74911261	11	108357137	A	G	0.03	-1.3	0.04	1e-200	1173.88
MIA	Sun_1	3301	rs2604877	19	41275048	C	T	0.068	1.44	0.04	1e-200	1176.24
MX1	Pietzner	10708	rs464138	21	42798173	A	C	0.59	0.45	0.01	1e-200	1180.05
SMAP1	Pietzner	10708	rs1917342	6	71349754	A	G	0.7	0.49	0.01	1e-200	1184.42
PDE4A	Pietzner	10708	rs145530718	19	10568883	C	G	0.02	1.6	0.05	1e-200	1185.93
GLIPR2	Ferkingstad	35559	rs4878643	9	36153437	C	G	0.291	-0.28	0.01	1e-200	1188.01
RTP4	Pietzner	10708	rs1878861	3	187093692	A	G	0.6	-0.46	0.01	1e-200	1192.83
MARCO	Sun_2	35571	rs35288880	2	119728472	T	C	0.163	-0.35	0.01	8.02e-261	1195.18
FGFBP3	Ferkingstad	35559	rs11186737	10	93666349	T	C	0.263	-0.29	0.01	1e-200	1199.22
MERTK	Sun_2	35571	rs10188642	2	112741099	A	G	0.626	-0.26	0.01	0	1200.09
ECH1	Pietzner	10708	rs2229259	19	39307103	T	C	0.11	0.72	0.02	1e-200	1201.99
LPO	Sun_2	35571	rs7219860	17	56321271	A	G	0.218	-0.31	0.01	5.45e-260	1204.09
CR1	Pietzner	10708	rs679515	1	207750568	T	C	0.18	0.59	0.02	1e-200	1207.7
POFUT1	Pietzner	10708	rs76143353	20	30815755	T	C	0.06	-0.95	0.03	1e-200	1207.74
NTproBNP	Sun_2	35571	rs198389	1	11919271	G	A	0.419	0.26	0.01	5.72e-302	1210.27
BET1L	Pietzner	10708	rs11604127	11	196944	T	C	0.23	0.54	0.02	1e-200	1212.87
ENG	Sun_2	35571	rs11794565	9	130601277	T	C	0.464	0.26	0.01	3.52e-228	1217.85
ODAM	Sun_2	35571	rs76153614	4	71061318	C	T	0.052	-0.58	0.02	4.04e-255	1222.46
CBR3	Sun_1	3301	rs1028997	21	37532222	A	G	0.376	-0.76	0.02	1e-200	1226.61
SAT2	Pietzner	10708	rs858522	17	7526887	A	C	0.57	-0.46	0.01	1e-200	1233.01
DNER	Sun_2	35571	rs34412673	2	230592359	T	A	0.331	-0.28	0.01	5.96e-259	1233.17
LGALS8	Sun_2	35571	rs1475133	1	236716686	A	G	0.762	0.3	0.01	0	1234.74
QPCTL	Ferkingstad	35559	rs17850756	19	46206262	A	G	0.279	-0.29	0.01	1e-200	1246.05
TNFSF13	Sun_2	35571	rs3803800	17	7462969	G	A	0.789	-0.32	0.01	3.53e-275	1246.52
CDNF	Pietzner	10708	rs61738953	10	14862082	C	G	0.96	1.17	0.04	1e-200	1252.97
DPP10	Sun_2	35571	rs12711819	2	115936670	A	T	0.497	-0.26	0.01	2.8e-304	1254.16
RTN4R	Sun_2	35571	rs663353	22	20174712	A	G	0.748	-0.3	0.01	0	1257.85
CA12	Sun_2	35571	rs12916532	15	63674171	C	T	0.275	-0.29	0.01	1.14e-293	1259.88
HYAL1	Sun_2	35571	rs116482870	3	50339622	T	C	0.063	-0.54	0.02	8.37e-284	1260.41
TSTD1	Pietzner	10708	rs10908821	1	161008535	C	G	0.87	-0.69	0.02	1e-200	1271.25
RETN	Sun_2	35571	rs3219175	19	7733855	A	G	0.008	1.53	0.05	1.24e-241	1279.13
CNTN3	Sun_2	35571	rs4677414	3	74607020	G	A	0.929	-0.51	0.01	0	1279.25
AGXT	Sun_2	35571	rs55649245	2	241793545	A	G	0.31	-0.29	0.01	5.75e-278	1279.5
UGDH	Pietzner	10708	rs7669821	4	39522223	T	C	0.58	0.47	0.01	1e-200	1285.02
B4GAT1	Sun_2	35571	rs10896113	11	66117111	T	C	0.222	-0.32	0.01	1.81e-273	1287.45
ITGB6	Sun_2	35571	rs6432601	2	160977943	G	A	0.693	0.29	0.01	7.5e-282	1293.12
LGALS1	Sun_2	35571	rs4820294	22	38071043	A	G	0.334	-0.28	0.01	2.8e-270	1294.39
KNG1	Pietzner	10708	rs5030062	3	186454180	A	C	0.63	-0.48	0.01	1e-200	1300.41
QPCT	Sun_2	35571	rs4670696	2	37599963	C	A	0.024	-0.88	0.02	2.42e-292	1301.51
PTGFRN	Sun_1	3301	rs4233450	1	117490261	T	G	0.829	1	0.03	1e-200	1305.44
KEL	Sun_2	35571	rs8176059	7	142651354	A	G	0.012	-1.25	0.03	0	1305.76
A1BG	Pietzner	10708	rs893184	19	58864479	T	C	0.05	-1.07	0.03	1e-200	1309.29
SMOC1	Sun_2	35571	rs1958078	14	70354858	C	A	0.847	0.37	0.01	1.15e-299	1311.39
ENPP5	Sun_1	3301	rs1047153	6	46128745	T	C	0.646	-0.79	0.02	1e-200	1317.85
TREM2	Ferkingstad	35559	rs143332484	6	41129207	T	C	0.009	-1.44	0.04	1e-200	1318.93
GGT5	Sun_2	35571	rs5760275	22	24643449	G	C	0.208	0.33	0.01	2.48e-294	1321.26
IFNAR1	Pietzner	10708	rs2257167	21	34715699	C	G	0.13	-0.7	0.02	1e-200	1321.73
ACADM	Pietzner	10708	rs145024038	1	76195431	T	TG	0.7	-0.51	0.01	1e-200	1324.57
GKN2	Pietzner	10708	rs62133344	2	69177269	A	C	0.06	-0.99	0.03	1e-200	1327.7
FUT3	Sun_1	3301	rs708686	19	5840619	T	C	0.274	-0.85	0.02	1e-200	1330.82
GRK5	Sun_2	35571	rs10886430	10	121010256	G	A	0.128	-0.4	0.01	2.94e-247	1333.43
SMPDL3A	Sun_1	3301	rs28385609	6	123122464	T	C	0.145	-1.08	0.03	1e-200	1342.31
ISG15	Pietzner	10708	rs4615788	1	948870	C	G	0.04	-1.21	0.03	1e-200	1353.8
CAMKK1	Sun_2	35571	rs753513	17	3793472	T	C	0.286	-0.3	0.01	9.21e-308	1358.47
NRCAM	Sun_2	35571	rs138528835	7	107987349	TTAAA	T	0.308	0.29	0.01	1.16e-295	1361.19
SIGLEC14	Sun_1	3301	rs1106476	19	52130637	A	T	0.117	-1.19	0.03	1e-200	1364.54
DPEP2	Sun_2	35571	rs144339907	16	68025998	C	A	0.004	-2.27	0.06	0	1366.61
SDSL	Pietzner	10708	rs113152874	12	113867073	C	G	0.03	1.4	0.04	1e-200	1371.85
CROT	Pietzner	10708	rs31653	7	87032613	A	G	0.11	-0.76	0.02	1e-200	1373.3
LILRA6	Sun_1	3301	rs35361042	19	54748737	G	C	0.091	1.34	0.04	1e-200	1394.15
MXRA7	Ferkingstad	35559	rs7219390	17	74684858	C	T	0.409	-0.28	0.01	1e-200	1400.87
TNFSF14	Folkersen	30000	rs344560	19	6665020	T	C	0.06	-0.63	0.03	4.01e-140	1405.97
PGLYRP1	Sun_2	35571	rs2072563	19	46526648	A	G	0.325	-0.3	0.01	1.16e-297	1412.25
PTPRS	Sun_2	35571	rs55763631	19	5293583	A	C	0.048	0.65	0.02	6.18e-283	1414.91
PIK3IP1	Sun_2	35571	rs2413028	22	31541907	C	T	0.171	-0.37	0.01	0	1414.92
MRC1	Pietzner	10708	rs181242111	10	17865664	A	G	0.13	0.72	0.02	1e-200	1417.7
CCL3	Pietzner	10708	rs2015086	17	34391617	A	G	0.86	-0.7	0.02	1e-200	1422.95
DRAXIN	Sun_2	35571	rs6679089	1	11752140	A	G	0.056	-0.6	0.02	0	1424.56
SULT2A1	Sun_2	35571	rs62129966	19	48374950	A	C	0.165	-0.37	0.01	3.91e-306	1426.61
B3GALTL	Pietzner	10708	rs1995970	13	31874303	T	C	0.77	0.58	0.01	1e-200	1431.27
CD302	Sun_2	35571	rs2556106	2	160654524	T	G	0.872	-0.42	0.01	0	1432.48
SELL	Pietzner	10708	rs4140655	1	169666597	A	T	0.74	0.56	0.01	1e-200	1439.59
EPHB1	Ferkingstad	35559	rs185257	3	134672285	A	C	0.477	0.28	0.01	1e-200	1447.4
COLEC11	Sun_1	3301	rs6542680	2	3640142	T	C	0.821	-1.02	0.03	1e-200	1453.18
DNPH1	Sun_2	35571	rs77321231	6	43200203	T	C	0.104	-0.46	0.01	0	1460.27
ENGASE	Pietzner	10708	rs56107536	17	77071040	A	C	0.13	0.73	0.02	1e-200	1462.84
TNFSF12	Pietzner	10708	rs80067372	17	7452752	A	G	0.28	0.55	0.01	1e-200	1468.78
CDON	Pietzner	10708	rs201453301	11	125889893	G	GC	0.09	-0.86	0.02	1e-200	1475.78
POR	Pietzner	10708	rs59882870	7	75638421	A	G	0.16	0.67	0.02	1e-200	1484.11
CD300A	Pietzner	10708	rs2272111	17	72469966	A	G	0.2	-0.62	0.02	1e-200	1485.13
H6PD	Pietzner	10708	rs2310925	1	9306849	T	C	0.6	0.5	0.01	1e-200	1486.62
FAIM	Pietzner	10708	rs641320	3	138347957	A	G	0.07	-0.97	0.03	1e-200	1491.13
MMP10	Folkersen	30000	rs17860955	11	102649482	T	C	0.98	1.1	0.04	6.11e-138	1493.72
WASF1	Sun_2	35571	rs1980532	6	110720209	G	A	0.445	-0.29	0.01	6.62e-280	1497.75
SAMD9L	Sun_2	35571	rs17165120	7	92777091	C	A	0.069	-0.56	0.01	0	1508.61
LPA	Yao	6861	rs55730499	6	161005610	C	T	0.939	-1.26	0.05	3.77e-167	1510.04
NECTIN4	Sun_2	35571	rs35434391	1	161049509	T	G	0.117	-0.45	0.01	0	1515.09
LEPR	Suhre	1000	rs17415296	1	66099013	A	C	0.19	-1.4	0.03	1e-200	1517.68
GALNT2	Sun_2	35571	rs4846914	1	230295691	A	G	0.607	0.29	0.01	0	1518.8
TRIM5	Sun_2	35571	rs11821656	11	5689144	C	G	0.14	-0.41	0.01	0	1531.21
CGA_CGB_CGB5_CGB7_CGB8_CGB3	Pietzner	10708	rs79785970	19	49517331	C	G	0.92	-0.92	0.02	1e-200	1531.28
VSIR	Pietzner	10708	rs10762477	10	73531069	A	G	0.86	-0.72	0.02	1e-200	1531.91
TCL1A	Sun_2	35571	rs78986913	14	96162418	A	G	0.043	-0.71	0.02	0	1541.18
EPS8L2	Sun_2	35571	rs11246276	11	706284	T	G	0.159	-0.4	0.01	0	1545.52
PRSS57	Pietzner	10708	rs9304936	19	689590	C	G	0.29	-0.56	0.01	1e-200	1555.28
CCL4	Folkersen	30000	rs8064426	17	34819750	A	G	0.15	-0.44	0.02	1.76e-166	1557.85
STARD5	Pietzner	10708	rs4392019	15	81616559	T	C	0.04	1.29	0.03	1e-200	1563.18
DLK1	Pietzner	10708	rs12881545	14	101176212	C	G	0.66	0.53	0.01	1e-200	1564.48
OAF	Pietzner	10708	rs2845705	11	120101092	A	T	0.21	0.62	0.02	1e-200	1565.1
CCN2	Sun_2	35571	rs7767139	6	132292781	G	C	0.216	-0.35	0.01	0	1567.83
RBP5	Sun_2	35571	rs76904513	12	7278118	G	A	0.088	-0.51	0.01	0	1568.77
FCER2	Sun_2	35571	rs2277989	19	7761812	G	A	0.488	-0.29	0.01	0	1571.62
LTBR	Sun_2	35571	rs10849449	12	6498662	G	A	0.655	-0.31	0.01	0	1582.95
IL18	Sun_2	35571	rs2250417	11	112085316	C	T	0.541	-0.29	0.01	0	1584.22
TNFRSF6B	Sun_2	35571	rs6062497	20	62336258	T	C	0.666	-0.31	0.01	0	1587.64
ROR1	Sun_2	35571	rs6588083	1	64614011	C	T	0.171	-0.39	0.01	0	1590.52
CXCL11	Pietzner	10708	rs35170645	4	76964956	A	G	0.48	0.51	0.01	1e-200	1597.51
ARSB	Sun_2	35571	rs1065757	5	78181477	T	C	0.439	-0.3	0.01	1.15e-299	1604.16
ICAM3	Sun_2	35571	rs28378712	19	10457472	G	T	0.313	0.32	0.01	0	1607.18
KIR2DL5A	Sun_1	3301	rs12980151	19	55374472	A	C	0.263	0.92	0.02	1e-200	1611.08
CRTAM	Sun_2	35571	rs2370794	11	122714782	G	A	0.337	0.31	0.01	0	1617.1
CEL	Ferkingstad	35559	rs592267	9	135940973	T	C	0.024	0.97	0.03	1e-200	1618.69
THBD	Folkersen	30000	rs1042579	20	23028724	A	G	0.2	0.4	0.01	6.76e-208	1618.78
SCARF2	Sun_2	35571	rs9610447	22	20768891	T	C	0.746	0.34	0.01	0	1619.62
CD274	Sun_2	35571	rs822340	9	5453260	G	A	0.745	0.34	0.01	0	1633.6
LEAP2	Ferkingstad	35559	rs12515756	5	132238880	C	T	0.164	0.4	0.01	1e-200	1634.93
SCARA5	Sun_2	35571	rs2726951	8	27805783	T	C	0.269	-0.34	0.01	0	1640.33
MMP1	Pietzner	10708	rs471994	11	102697731	A	G	0.36	-0.54	0.01	1e-200	1640.62
CRELD2	Sun_2	35571	rs74510325	22	50315382	G	C	0.035	-0.81	0.02	0	1648.49
MTHFSD	Pietzner	10708	rs11642368	16	86568701	A	T	0.59	0.53	0.01	1e-200	1661.8
APOC1	Ferkingstad	35559	rs5112	19	45430280	G	C	0.488	0.3	0.01	1e-200	1674.42
FBP1	Sun_2	35571	rs499206	9	97359479	G	A	0.925	0.57	0.01	0	1676.99
PCSK9	Sun_2	35571	rs11591147	1	55505647	T	G	0.018	-1.14	0.03	0	1679.87
CHL1	Sun_2	35571	rs931679	3	259525	A	T	0.087	0.53	0.01	0	1685.91
THSD1	Pietzner	10708	rs41292808	13	52971517	T	C	0.03	1.53	0.04	1e-200	1688.65
PLEKHA1	Pietzner	10708	rs10788274	10	124060802	A	G	0.53	-0.53	0.01	1e-200	1704.11
TRDMT1	Pietzner	10708	rs6602180	10	17192362	T	C	0.54	0.53	0.01	1e-200	1706.07
SFTPB	Pietzner	10708	rs1130866	2	85893741	A	G	0.52	-0.53	0.01	1e-200	1715.63
CA4	Sun_2	35571	rs117154637	17	58234154	T	A	0.035	-0.82	0.02	0	1719.65
GAA	Pietzner	10708	rs2304849	17	78075462	C	G	0.24	-0.62	0.02	1e-200	1726.58
ADA2	Sun_1	3301	rs2231495	22	17669306	C	T	0.333	-0.88	0.02	1e-200	1730.01
CLEC1A	Sun_2	35571	rs7961483	12	10230460	T	C	0.62	-0.31	0.01	0	1732.44
CTSD	Sun_2	35571	rs55861089	11	1783757	G	A	0.105	-0.5	0.01	0	1738.64
KIAA1549L	Pietzner	10708	rs2753408	11	33399691	A	G	0.45	-0.53	0.01	1e-200	1744.24
GSTA3	Sun_2	35571	rs6458871	6	52665977	T	C	0.574	0.31	0.01	0	1754.43
ACVRL1	Sun_2	35571	rs77709482	12	52308021	C	T	0.081	0.56	0.01	0	1755.38
FAM177A1	Pietzner	10708	rs799473	14	35516213	T	G	0.84	-0.72	0.02	1e-200	1755.86
IL4R	Sun_2	35571	rs8060025	16	27327214	G	T	0.612	0.32	0.01	0	1759.36
ITIH3	Pietzner	10708	rs2535629	3	52833219	A	G	0.34	0.56	0.01	1e-200	1768.23
SERPINA1	Pietzner	10708	rs28929474	14	94844947	T	C	0.02	-1.9	0.04	1e-200	1769.09
CPXM1	Sun_2	35571	rs215545	20	2782015	C	T	0.765	0.36	0.01	0	1770.62
SIGLEC12	Sun_1	3301	rs3826667	19	52004074	T	C	0.835	-1.13	0.03	1e-200	1790.87
TDRKH	Sun_2	35571	rs4845556	1	151744858	A	G	0.481	0.31	0.01	0	1792.72
PRSS3	Pietzner	10708	rs2005617	9	33791164	T	C	0.37	-0.56	0.01	1e-200	1795.19
ENO3	Ferkingstad	35559	rs238238	17	4856376	A	G	0.331	0.33	0.01	1e-200	1800.93
MEGF9	Sun_2	35571	rs7849566	9	123460769	C	A	0.7	0.34	0.01	0	1803.15
HBZ	Sun_1	3301	rs2461286	16	203254	G	A	0.647	-0.88	0.02	1e-200	1805.69
ELANE	Ferkingstad	35559	rs10409474	19	850733	G	C	0.139	0.45	0.01	1e-200	1812.39
ST3GAL6	Sun_1	3301	rs72934623	3	98509705	A	G	0.053	-1.88	0.04	1e-200	1814.07
FXYD5	Sun_2	35571	rs756845	19	35663250	G	A	0.78	-0.38	0.01	0	1836.06
SLITRK3	Ferkingstad	35559	rs62282372	3	164911954	G	C	0.111	-0.5	0.01	1e-200	1840.82
EFNA1	Sun_2	35571	rs4390169	1	155106054	G	A	0.519	0.31	0.01	0	1841.58
GAS6	Sun_2	35571	rs6602909	13	114551993	C	T	0.325	-0.34	0.01	0	1853.35
SPINT2	Sun_1	3301	rs71354995	19	38791841	G	A	0.243	-0.99	0.02	1e-200	1860.37
IL1RL1	Sun_1	3301	rs10179654	2	102921783	G	T	0.521	-0.85	0.02	1e-200	1860.63
TFPI	Sun_2	35571	rs7576066	2	188343781	A	G	0.295	0.35	0.01	0	1862.07
CTSB	Pietzner	10708	rs1736084	8	11703657	T	C	0.26	0.62	0.01	1e-200	1865.55
CD8A	Ferkingstad	35559	rs3020726	2	87016506	G	A	0.196	0.4	0.01	1e-200	1885.94
SIGLEC7	Sun_2	35571	rs140185670	19	51646140	C	G	0.068	-0.63	0.02	0	1898.64
ACAA1	Ferkingstad	35559	rs2229528	3	38167095	G	A	0.077	-0.6	0.01	1e-200	1905.59
ANG	Pietzner	10708	rs11851044	14	21154495	C	G	0.12	0.85	0.02	1e-200	1911.81
CCL15	Sun_1	3301	rs854624	17	34327923	T	G	0.931	-1.69	0.04	1e-200	1912.25
GPC1	Sun_2	35571	rs77078946	2	241403417	G	T	0.114	0.5	0.01	0	1920.78
KLKB1	Pietzner	10708	rs71640035	4	187161061	T	G	0.58	-0.56	0.01	1e-200	1938.86
HIBCH	Ferkingstad	35559	rs291466	2	191184475	A	G	0.389	-0.33	0.01	1e-200	1941.53
RELT	Sun_2	35571	rs56801796	11	73090265	G	A	0.207	0.4	0.01	0	1941.62
PLA2G2A	Sun_1	3301	rs11573156	1	20306146	C	G	0.232	1.02	0.02	1e-200	1943.74
ZBTB16	Sun_2	35571	rs73000929	11	113953622	A	G	0.037	0.85	0.02	0	1945.65
HS3ST3B1	Sun_2	35571	rs17669311	17	13837051	A	G	0.392	0.33	0.01	0	1948.21
MTRF1L	Pietzner	10708	rs12206911	6	153323142	T	C	0.19	-0.71	0.02	1e-200	1953.17
SCGB1A1	Sun_2	35571	rs3741240	11	62186542	A	G	0.351	-0.34	0.01	0	1954.07
ITIH5	Ferkingstad	35559	rs12761343	10	7709370	C	G	0.344	-0.34	0.01	1e-200	1958.11
IDI2	Sun_2	35571	rs1044261	10	1065710	T	C	0.078	-0.6	0.01	0	1969.74
BCHE	Pietzner	10708	rs17713088	3	165488604	T	G	0.21	-0.69	0.02	1e-200	1987.85
ACP1	Suhre	1000	rs11553746	2	272203	T	C	0.32	1.24	0.03	1e-200	1989.39
CD244	Sun_2	35571	rs115868021	1	160811374	G	C	0.006	-2.17	0.05	0	1999.71
ACP5	Sun_2	35571	rs2305799	19	11687351	T	C	0.123	-0.5	0.01	0	2008.09
TNFRSF10B	Sun_2	35571	rs1105944	8	22885109	G	A	0.896	0.54	0.01	0	2012.2
PPCDC	Sun_2	35571	rs12591994	15	75320306	G	A	0.064	0.67	0.02	0	2014.93
FAHD1	Pietzner	10708	rs1143032	16	1878031	A	G	0.16	0.77	0.02	1e-200	2017.2
LYPD3	Sun_2	35571	rs7257767	19	44001345	T	C	0.113	-0.52	0.01	0	2023.6
GLO1	Sun_2	35571	rs4746	6	38650628	G	T	0.464	-0.33	0.01	0	2024.19
APOH	Pietzner	10708	rs1801689	17	64210580	A	C	0.97	1.66	0.04	1e-200	2033.23
CD4	Sun_2	35571	rs73053728	12	6896546	G	A	0.303	-0.36	0.01	0	2036.5
SSC4D	Sun_2	35571	rs12540573	7	76039013	C	A	0.062	0.68	0.01	0	2037.17
PPIL1	Pietzner	10708	rs12194408	6	36839598	C	G	0.97	1.66	0.04	1e-200	2044.94
CLMP	Sun_2	35571	rs73017877	11	123063062	G	C	0.552	0.33	0.01	0	2063.88
ITIH2	Pietzner	10708	rs4463754	10	7753366	A	G	0.94	-1.2	0.03	1e-200	2072.12
GSTT2B	Pietzner	10708	rs5751777	22	24267047	T	C	0.59	-0.58	0.01	1e-200	2072.55
TGM3	Ferkingstad	35559	rs214830	20	2321105	G	C	0.307	-0.36	0.01	1e-200	2076.43
TMEM132D	Ferkingstad	35559	rs55851595	12	130080289	T	C	0.07	0.65	0.01	1e-200	2078.51
REG1B	Sun_2	35571	rs11126696	2	79323888	G	A	0.619	0.34	0.01	0	2089.78
CD300E	Sun_2	35571	rs1719465	17	72576391	C	T	0.688	-0.36	0.01	0	2109.92
CHIT1	Sun_1	3301	rs872583	1	203184766	C	T	0.202	-1.1	0.02	1e-200	2110.03
MFGE8	Sun_2	35571	rs34239095	15	89455768	G	C	0.282	0.37	0.01	0	2110.61
PON3	Sun_2	35571	rs149867961	7	95025744	C	T	0.026	-1.05	0.02	0	2111.75
INHBB	Ferkingstad	35559	rs17050272	2	121306440	A	G	0.418	0.34	0.01	1e-200	2118.5
THY1	Sun_2	35571	rs55933700	11	119293913	T	G	0.025	-1.08	0.03	0	2123.05
CTRC	Sun_2	35571	rs497078	1	15767036	T	C	0.098	-0.56	0.01	0	2123.57
MST1	Suhre	1000	rs9858542	3	49701983	A	G	0.28	-1.3	0.03	1e-200	2124.26
PTGR1	Pietzner	10708	rs59165439	9	114357952	T	C	0.25	-0.67	0.01	1e-200	2128.38
TMEM132A	Pietzner	10708	rs555835	11	60689445	T	C	0.37	-0.6	0.01	1e-200	2150.55
DPP7	Pietzner	10708	rs10747049	9	140008750	C	G	0.75	0.67	0.01	1e-200	2159.24
CPN2	Pietzner	10708	rs3732477	3	194062519	T	C	0.28	-0.65	0.01	1e-200	2165.84
QSOX2	Ferkingstad	35559	rs10858248	9	139108324	A	G	0.464	0.34	0.01	1e-200	2169.47
ICAM5	Pietzner	10708	rs281439	19	10400110	C	G	0.77	0.69	0.02	1e-200	2179.19
AHCY	Sun_2	35571	rs13043752	20	32883308	A	G	0.016	-1.36	0.03	0	2184.52
IL6R	Suhre	1000	rs4129267	1	154426264	T	C	0.38	1.21	0.03	1e-200	2196.68
RBKS	Sun_2	35571	rs140948699	2	28081439	G	C	0.009	-1.81	0.04	0	2202.45
PCDH17	Sun_2	35571	rs11148472	13	60020189	C	A	0.391	0.35	0.01	0	2203.62
PAMR1	Sun_2	35571	rs61736408	11	35456061	C	T	0.157	-0.47	0.01	0	2208.98
DKK3	Sun_2	35571	rs11022114	11	12038874	A	G	0.316	0.37	0.01	0	2209.77
NT5C	Pietzner	10708	rs78625720	17	73140941	A	G	0.03	-1.72	0.04	1e-200	2217.38
PAM	Pietzner	10708	rs35658696	5	102338811	A	G	0.95	1.34	0.03	1e-200	2217.74
PLA2R1	Sun_1	3301	rs3749117	2	160885442	C	T	0.501	-0.9	0.02	1e-200	2245.52
CCL16	Sun_1	3301	rs112689088	17	34307457	C	T	0.098	-1.52	0.03	1e-200	2277.97
PLTP	Pietzner	10708	rs6073958	20	44551855	T	C	0.8	0.74	0.02	1e-200	2282.08
MBL2	Sun_1	3301	rs7899547	10	54536839	G	T	0.653	0.95	0.02	1e-200	2283.03
ANXA2	Pietzner	10708	rs34293839	15	60715248	A	G	0.86	-0.86	0.02	1e-200	2287.2
NT5DC3	Pietzner	10708	rs954921	12	104173630	T	C	0.6	-0.61	0.01	1e-200	2291.03
PROK1	Sun_2	35571	rs1857512	1	110993349	A	G	0.159	0.48	0.01	0	2299.6
EVL	Pietzner	10708	rs75416067	14	100421429	C	CT	0.75	-0.69	0.02	1e-200	2302.32
IL17D	Sun_2	35571	rs4770059	13	21151047	C	T	0.737	-0.4	0.01	0	2304.65
C1QA	Sun_2	35571	rs12058824	1	22963050	A	G	0.083	-0.63	0.01	0	2315.48
IL5RA	Sun_2	35571	rs77400868	3	3150964	G	A	0.134	0.51	0.01	0	2315.63
WISP1	Pietzner	10708	rs2013158	8	134202942	A	C	0.26	0.68	0.01	1e-200	2317.25
VSIR	Pietzner	10708	rs10762476	10	73530977	A	C	0.14	0.86	0.02	1e-200	2326.42
SMOC2	Sun_2	35571	rs4708467	6	168825259	T	C	0.277	-0.39	0.01	0	2359.38
FLRT3	Pietzner	10708	rs6135225	20	14678135	T	G	0.31	-0.65	0.01	1e-200	2361.98
CYTL1	Ferkingstad	35559	rs9998211	4	5026641	C	A	0.19	0.45	0.01	1e-200	2362.55
VIT	Ferkingstad	35559	rs1468810	2	36993940	C	A	0.405	0.36	0.01	1e-200	2368.48
CD38	Sun_2	35571	rs28703311	4	15775851	A	G	0.223	-0.43	0.01	0	2378.32
GALNT3	Sun_2	35571	rs2116546	2	166723533	C	T	0.298	-0.39	0.01	0	2391.45
IGLL1	Ferkingstad	35559	rs9624216	22	23922552	A	G	0.097	-0.6	0.01	1e-200	2395.71
FCRL1	Sun_2	35571	rs4971154	1	157771880	T	C	0.503	-0.36	0.01	0	2406.35
CTSZ	Sun_2	35571	rs199825459	20	57572709	G	A	0.008	-1.95	0.04	0	2413.42
RET	Sun_2	35571	rs2795507	10	43352894	C	T	0.794	-0.44	0.01	0	2431.17
SHANK3	Ferkingstad	35559	rs9616906	22	51104680	A	G	0.449	-0.36	0.01	1e-200	2436.46
MANEA	Sun_1	3301	rs80268500	6	96009498	C	T	0.082	-1.68	0.03	1e-200	2437.57
DDC	Sun_2	35571	rs12112308	7	50603487	C	T	0.016	-1.43	0.03	0	2471.37
FUCA1	Sun_2	35571	rs13551	1	24180962	C	T	0.339	-0.38	0.01	0	2474.95
MANSC4	Pietzner	10708	rs9668702	12	27919491	T	G	0.77	-0.73	0.01	1e-200	2499.39
SLITRK6	Sun_2	35571	rs12863734	13	86370571	A	G	0.017	-1.4	0.03	0	2528.02
HBQ1	Sun_2	35571	rs3760047	16	281299	A	G	0.811	0.47	0.01	0	2529.47
PRTN3	Pietzner	10708	rs6510982	19	845535	C	G	0.25	-0.71	0.02	1e-200	2530.46
PPIC	Pietzner	10708	rs17388251	5	122360403	T	C	0.62	0.64	0.01	1e-200	2530.87
FTCD	Ferkingstad	35559	rs61735836	21	47572887	T	C	0.044	0.89	0.01	1e-200	2538.61
IFNLR1	Sun_2	35571	rs139958347	1	24513723	C	G	0.04	-0.94	0.02	0	2550.36
NAAA	Pietzner	10708	rs111981122	4	76855106	A	C	0.77	0.74	0.01	1e-200	2550.41
SPINK6	Pietzner	10708	rs1159203	5	147619072	A	C	0.08	-1.15	0.02	1e-200	2571.24
GALNT10	Sun_2	35571	rs890793	5	153573938	T	C	0.382	0.38	0.01	0	2617.77
LIPN	Sun_1	3301	rs10509554	10	90525792	T	C	0.307	1.02	0.02	1e-200	2620.53
NAGPA	Ferkingstad	35559	rs12599777	16	5079466	G	A	0.182	-0.48	0.01	1e-200	2621.35
MATN2	Sun_2	35571	rs1869609	8	98991221	G	A	0.663	0.39	0.01	0	2650.06
HEBP1	Pietzner	10708	rs1941	12	13128263	C	G	0.96	1.61	0.03	1e-200	2652.77
CLSTN2	Sun_2	35571	rs41265459	3	140167490	A	T	0.007	2.27	0.05	0	2653.36
TNR	Sun_2	35571	rs2235256	1	175569047	G	A	0.445	-0.38	0.01	0	2654.73
MMAB	Pietzner	10708	rs76118041	12	109988723	A	G	0.18	-0.82	0.02	1e-200	2667.5
NMRAL1	Pietzner	10708	rs11557236	16	4519439	A	G	0.09	-1.1	0.02	1e-200	2670.52
CD300LG	Sun_2	35571	rs72836561	17	41926126	T	C	0.032	-1.07	0.02	0	2686.98
CRHBP	Pietzner	10708	rs1700658	5	76210859	A	G	0.64	-0.66	0.01	1e-200	2698.84
SMPD1	Sun_2	35571	rs1050239	11	6415463	A	G	0.243	-0.44	0.01	0	2710.3
ENPP7	Sun_1	3301	rs11871061	17	77706544	C	T	0.359	0.99	0.02	1e-200	2710.98
RNASET2	Sun_2	35571	rs3756838	6	167371251	A	G	0.215	0.46	0.01	0	2720.19
ANPEP	Sun_2	35571	rs1042499	15	90328305	C	T	0.057	0.81	0.02	0	2720.69
AMY2B	Sun_2	35571	rs12080068	1	104329823	A	C	0.092	0.65	0.01	0	2725.07
CCL18	Pietzner	10708	rs2015086	17	34391617	A	G	0.86	-0.92	0.02	1e-200	2725.66
LAYN	Sun_2	35571	rs542275	11	111431614	T	C	0.616	0.39	0.01	0	2742.66
VWA1	Ferkingstad	35559	rs115503338	1	1369623	A	G	0.024	-1.24	0.01	1e-200	2748.03
PON1	Yao	6861	rs2237582	7	94934200	G	A	0.28	0.85	0.02	1e-200	2773
EDAR	Sun_2	35571	rs140661471	2	109603739	A	G	0.014	1.64	0.03	0	2802.68
SIGLEC1	Sun_2	35571	rs189448562	20	3705115	C	G	0.011	-1.83	0.04	0	2832.56
LPL	Sun_2	35571	rs1801177	8	19805708	A	G	0.018	-1.46	0.03	0	2834.68
MAGI2	Pietzner	10708	rs73147474	7	79065927	A	C	0.85	-0.91	0.02	1e-200	2865.92
PCSK1	Sun_1	3301	rs6234	5	95728974	C	G	0.26	-1.1	0.02	1e-200	2874.37
IGFBPL1	Sun_2	35571	rs7857243	9	38409081	A	G	0.807	0.49	0.01	0	2875.31
CEACAM5	Sun_2	35571	rs9621	19	42231159	A	G	0.043	0.96	0.02	0	2878.26
MMP8	Sun_2	35571	rs35231465	11	102584135	A	G	0.025	-1.25	0.02	0	2897.96
CD160	Sun_2	35571	rs9728526	1	145716763	A	G	0.439	-0.39	0.01	0	2913.24
GLCE	Pietzner	10708	rs35810867	15	69536159	A	T	0.23	-0.78	0.01	1e-200	2931.23
PLEKHA7	Pietzner	10708	rs425325	11	16885175	A	G	0.1	1.1	0.02	1e-200	2946.56
FCN2	Pietzner	10708	rs7851696	9	137779091	T	G	0.11	-1.05	0.02	1e-200	2947.34
BTD	Pietzner	10708	rs13078881	3	15686693	C	G	0.04	-1.68	0.03	1e-200	2953.87
LBP	Pietzner	10708	rs2232613	20	36997655	T	C	0.08	-1.22	0.02	1e-200	2972.3
MEGF10	Sun_2	35571	rs112394041	5	126628584	CT	C	0.459	0.4	0.01	0	2987.14
ECI2	Pietzner	10708	rs853417	6	4113123	A	G	0.32	-0.71	0.01	1e-200	2997.97
SPINK5	Sun_2	35571	rs6883868	5	147500883	T	C	0.624	0.41	0.01	0	2999.53
CD300C	Sun_2	35571	rs58440339	17	72539474	T	C	0.093	0.68	0.01	0	3009.54
SPINK1	Sun_2	35571	rs7725017	5	147217823	A	C	0.605	-0.4	0.01	0	3009.76
TESC	Pietzner	10708	rs59756806	12	117479019	T	C	0.65	0.7	0.01	1e-200	3060.47
MGMT	Sun_2	35571	rs1008982	10	131445731	C	T	0.374	-0.41	0.01	0	3070.13
ANGPTL7	Sun_2	35571	rs28991009	1	11253684	T	G	0.009	-2.16	0.04	0	3074.4
NUCB2	Sun_2	35571	rs214068	11	17305650	C	T	0.576	-0.4	0.01	0	3080.67
KLK4	Sun_2	35571	rs2664153	19	51415252	A	G	0.639	-0.42	0.01	0	3104.04
GCNT1	Sun_2	35571	rs2282683	9	79117751	G	A	0.21	-0.49	0.01	0	3121.21
FETUB	Sun_2	35571	rs114780909	3	186360255	A	T	0.009	-2.13	0.04	0	3128.85
BTC	Sun_2	35571	rs28549760	4	75719517	C	A	0.132	-0.6	0.01	0	3181.56
SAA4	Pietzner	10708	rs7117484	11	18248214	A	G	0.53	-0.68	0.01	1e-200	3192.31
CD40	Folkersen	30000	rs4810485	20	44747947	T	G	0.26	-0.5	0.01	0	3192.97
NCAM2	Ferkingstad	35559	rs2826851	21	22835946	G	A	0.266	0.46	0.01	1e-200	3205.11
LTBP3	Sun_2	35571	rs4099470	11	65319986	T	C	0.055	0.9	0.02	0	3220.45
KLRD1	Sun_2	35571	rs2537752	12	10467533	A	T	0.6	-0.42	0.01	0	3222.56
SWAP70	Pietzner	10708	rs6483656	11	9771687	C	G	0.65	-0.71	0.01	1e-200	3233.33
PCYOX1	Pietzner	10708	rs2706762	2	70488470	T	C	0.15	-0.96	0.02	1e-200	3244.39
TBC1D17	Sun_2	35571	rs746738	19	50386340	C	T	0.426	0.41	0.01	0	3253.55
VNN2	Pietzner	10708	rs9493423	6	133074133	A	G	0.34	-0.72	0.01	1e-200	3257.83
ENPEP	Ferkingstad	35559	rs33966350	4	111431444	A	G	0.016	-1.64	0.01	1e-200	3267.86
CCL14	Pietzner	10708	rs7222922	17	34335694	T	C	0.12	-1.05	0.02	1e-200	3281.92
PRTG	Sun_2	35571	rs10851591	15	56003705	G	A	0.693	0.45	0.01	0	3290.85
HABP4	Pietzner	10708	rs10820606	9	99192919	A	C	0.76	-0.8	0.01	1e-200	3292.91
NTM	Ferkingstad	35559	rs2511504	11	131196396	C	T	0.406	0.42	0.01	1e-200	3307.74
PIP	Ferkingstad	35559	rs73170678	7	142836203	T	A	0.138	0.6	0.01	1e-200	3319.57
CA8	Ferkingstad	35559	rs35552143	8	61188688	A	G	0.411	0.42	0.01	1e-200	3320.87
BPIFB1	Sun_2	35571	rs2424963	20	31694448	C	T	0.582	-0.42	0.01	0	3321.07
ICAM5	Pietzner	10708	rs281440	19	10400304	A	G	0.78	0.83	0.01	1e-200	3346.5
SUMF2	Sun_2	35571	rs35384521	7	56145825	A	G	0.019	-1.53	0.03	0	3381.2
BOLA1	Pietzner	10708	rs1451641	1	149865880	A	G	0.92	-1.28	0.02	1e-200	3381.64
LRP4	Ferkingstad	35559	rs2306029	11	46893108	T	C	0.446	0.42	0.01	1e-200	3394.72
NPW	Ferkingstad	35559	rs12921264	16	2070433	A	G	0.184	-0.54	0.01	1e-200	3407.58
ACE	Pietzner	10708	rs4353	17	61570422	A	G	0.53	0.7	0.01	1e-200	3418.57
CCN4	Sun_2	35571	rs12156037	8	134204458	G	A	0.354	-0.44	0.01	0	3437.31
CNTN5	Sun_2	35571	rs898776	11	99089041	A	G	0.922	-0.79	0.01	0	3450.99
APOA5	Pietzner	10708	rs3135506	11	116662407	C	G	0.06	1.49	0.02	1e-200	3557.63
ALPP	Sun_2	35571	rs12478529	2	233286654	T	C	0.235	0.5	0.01	0	3558.34
GNLY	Pietzner	10708	rs12151621	2	85934499	A	C	0.22	0.86	0.01	1e-200	3596.8
SERPINA10	Pietzner	10708	rs12434093	14	94755184	T	C	0.83	-0.95	0.02	1e-200	3607.06
GPR116	Pietzner	10708	rs476374	6	46831060	T	C	0.94	1.5	0.02	1e-200	3621.89
BST1	Sun_1	3301	rs73224660	4	15714762	A	G	0.159	-1.4	0.02	1e-200	3634.27
ADAM8	Sun_2	35571	rs2995310	10	135082810	T	C	0.894	-0.7	0.01	0	3638.08
KLK13	Sun_2	35571	rs3760739	19	51538561	T	G	0.351	-0.45	0.01	0	3648.47
HSP90B1	Sun_1	3301	rs1165693	12	104340204	A	G	0.321	1.1	0.02	1e-200	3682.43
CLSTN1	Ferkingstad	35559	rs150943878	1	9804315	T	C	0.009	2.36	0.01	1e-200	3683.87
TREML2	Pietzner	10708	rs62396356	6	41167763	A	G	0.87	-1.07	0.02	1e-200	3694.66
LY6D	Sun_2	35571	rs2572925	8	143867905	T	C	0.405	-0.44	0.01	0	3695.84
IL1RL2	Sun_2	35571	rs3917265	2	102778461	C	T	0.544	-0.44	0.01	0	3704.19
ADAMTS8	Sun_2	35571	rs2131535	11	130281488	A	G	0.731	0.49	0.01	0	3705
CHI3L1	Sun_1	3301	rs10920578	1	203154094	T	C	0.523	-1.03	0.02	1e-200	3710.12
KLK8	Sun_2	35571	rs74705037	19	51504808	A	G	0.045	1.05	0.02	0	3725.84
SIGLEC10	Sun_2	35571	rs148783636	19	51910979	C	T	0.02	-1.57	0.03	0	3726.83
ITIH1	Pietzner	10708	rs2286798	3	52821177	A	C	0.64	0.75	0.01	1e-200	3745.94
VASN	Sun_2	35571	rs35713275	16	4431360	A	G	0.063	-0.9	0.02	0	3748.82
PSMB4	Ferkingstad	35559	rs4246527	1	151403948	C	T	0.136	-0.64	0.01	1e-200	3797.63
PSG4	Pietzner	10708	rs12978398	19	43710045	T	C	0.4	0.74	0.01	1e-200	3817.46
PSG3	Pietzner	10708	rs2355433	19	43679088	A	G	0.46	0.73	0.01	1e-200	3826.3
SAA1	Sun_1	3301	rs35179000	11	18290903	C	T	0.779	-1.25	0.02	1e-200	3841.64
CD207	Sun_2	35571	rs17718987	2	71060936	C	G	0.325	0.47	0.01	0	3887.64
HAVCR1	Folkersen	30000	rs6555820	5	156472149	A	C	0.47	-0.48	0.01	0	3889.82
MMP3	Folkersen	30000	rs632478	11	102715681	T	G	0.49	-0.48	0.01	0	3903.94
SORCS2	Sun_2	35571	rs4234798	4	7219933	G	T	0.617	-0.46	0.01	0	3913.05
IGFBP3	Sun_2	35571	rs2854746	7	45960645	C	G	0.398	0.46	0.01	0	3915.36
COMT	Sun_2	35571	rs4680	22	19951271	A	G	0.518	-0.45	0.01	0	3922.8
REG3G	Ferkingstad	35559	rs369967	2	79253150	G	A	0.219	0.54	0.01	1e-200	3941.24
DECR2	Pietzner	10708	rs3743890	16	456416	T	G	0.49	0.73	0.01	1e-200	3945.11
SERPINA9	Sun_2	35571	rs11850199	14	94942663	A	C	0.271	-0.5	0.01	0	3950.72
PEBP1	Ferkingstad	35559	rs17619811	12	118733582	T	G	0.029	-1.33	0.01	1e-200	3963.39
VWC2	Sun_2	35571	rs769604	7	49815390	G	C	0.459	-0.45	0.01	0	4056.09
CNRIP1	Ferkingstad	35559	rs7578047	2	68579931	G	A	0.136	-0.66	0.01	1e-200	4066.26
HPGDS	Sun_2	35571	rs2865353	4	95270878	C	T	0.612	0.47	0.01	0	4071.35
C1S	Pietzner	10708	rs12146727	12	7170336	A	G	0.13	-1.11	0.02	1e-200	4105.77
NQO1	Pietzner	10708	rs12232410	16	69736851	A	G	0.19	-0.95	0.02	1e-200	4129.95
C8G	Ferkingstad	35559	rs7862602	9	139840471	G	T	0.437	0.46	0.01	1e-200	4131.3
PRELP	Sun_2	35571	rs41313926	1	203452409	A	G	0.01	-2.26	0.04	0	4134.43
NQO2	Pietzner	10708	rs138616686	6	3003970	A	G	0.69	0.81	0.01	1e-200	4148.9
ALDH3A1	Sun_2	35571	rs887241	17	19645938	C	A	0.658	0.48	0.01	0	4155.44
SPATA20	Pietzner	10708	rs8076632	17	48625928	C	G	0.64	0.78	0.01	1e-200	4215.49
GPX7	Pietzner	10708	rs1097234	1	53063559	A	C	0.17	1	0.01	1e-200	4220.76
TNFRSF10A	Sun_2	35571	rs13278062	8	23082971	T	G	0.502	-0.46	0.01	0	4249.42
CSTB	Folkersen	30000	rs35285321	21	45201832	A	G	0.33	-0.53	0.01	0	4254.66
CECR1	Pietzner	10708	rs2231495	22	17669306	T	C	0.67	0.81	0.01	1e-200	4330.14
NPTX1	Sun_2	35571	rs62068268	17	78539090	T	C	0.089	0.82	0.01	0	4331.96
NUDT12	Pietzner	10708	rs6880267	5	102866815	C	G	0.84	1.04	0.02	1e-200	4341.13
SERPINE2	Pietzner	10708	rs13412535	2	224874874	A	G	0.24	-0.89	0.01	1e-200	4350.78
TNFRSF11A	Sun_2	35571	rs113339733	18	60018329	A	G	0.193	-0.59	0.01	0	4358.94
CLEC4A	Sun_2	35571	rs117213717	12	8278195	A	G	0.014	-1.99	0.03	0	4390.74
SSC5D	Sun_2	35571	rs55799523	19	55999545	A	C	0.265	0.53	0.01	0	4430.94
ANXA2	Pietzner	10708	rs8033800	15	60689179	A	T	0.6	-0.78	0.01	1e-200	4432.17
HSPB1	Sun_2	35571	rs111642997	7	75919995	CTTTTA	C	0.245	-0.55	0.01	0	4442.75
FCGR2B	Sun_1	3301	rs6665610	1	161641384	A	G	0.205	1.33	0.02	1e-200	4492.19
APOL3	Pietzner	10708	rs132642	22	36545137	A	T	0.17	-1.02	0.02	1e-200	4499.4
CBLN1	Pietzner	10708	rs12596832	16	49004958	A	G	0.14	-1.11	0.02	1e-200	4504.74
CPNE1	Pietzner	10708	rs6060524	20	34221155	T	G	0.11	-1.23	0.02	1e-200	4537.6
TPMT	Sun_2	35571	rs115306927	6	18126938	T	A	0.05	-1.09	0.02	0	4582.79
PENK	Ferkingstad	35559	rs2576575	8	57361293	T	C	0.454	-0.48	0.01	1e-200	4585.44
CST2	Ferkingstad	35559	rs4260306	20	23730336	T	C	0.255	-0.55	0.01	1e-200	4617.44
OLFM2	Pietzner	10708	rs55732232	19	10059160	C	G	0.35	0.81	0.01	1e-200	4620.72
CCS	Sun_2	35571	rs498045	11	66362997	G	A	0.526	0.48	0.01	0	4660.06
FGL1	Ferkingstad	35559	rs2073562	8	17742929	A	G	0.315	-0.52	0.01	1e-200	4700.97
KLK11	Pietzner	10708	rs1048328	19	51527364	A	G	0.08	-1.45	0.02	1e-200	4760.24
PBLD	Sun_2	35571	rs61854835	10	70038894	G	A	0.236	0.57	0.01	0	4802.18
NID2	Pietzner	10708	rs2516600	14	52487766	T	C	0.46	-0.79	0.01	1e-200	4828.82
FAM3B	Sun_2	35571	rs57529409	21	42718262	T	C	0.047	-1.15	0.02	0	4833.7
LYPD8	Sun_2	35571	rs12044252	1	249065691	C	T	0.094	0.84	0.01	0	4842.95
AOC1	Pietzner	10708	rs10452848	7	150523544	A	G	0.55	-0.8	0.01	1e-200	4874.35
PLXNC1	Ferkingstad	35559	rs115651556	12	94613898	A	G	0.015	-2.04	0.01	1e-200	4911.23
LY9	Sun_2	35571	rs12128261	1	160762784	G	T	0.218	0.6	0.01	0	4929.66
SELPLG	Sun_2	35571	rs7294337	12	109012694	T	C	0.016	-1.98	0.03	0	4945.51
PF4V1	Pietzner	10708	rs2367288	4	74714098	A	G	0.7	-0.87	0.01	1e-200	4956.08
NAGLU	Ferkingstad	35559	rs112629880	17	40615761	T	C	0.037	1.32	0.01	1e-200	4966.23
MMP12	Folkersen	30000	rs72981675	11	102721251	T	C	0.14	-0.77	0.01	0	4996.12
FLRT2	Sun_2	35571	rs17646457	14	86089315	A	G	0.151	-0.7	0.01	0	5051.43
CNTNAP2	Sun_2	35571	rs7810370	7	145366002	G	A	0.714	-0.55	0.01	0	5073.97
GLRX	Sun_2	35571	rs6556886	5	95163449	A	G	0.129	-0.75	0.01	0	5079.94
CTRB2	Pietzner	10708	rs66584288	16	75241676	A	AC	0.8	-1	0.01	1e-200	5097.73
CDH6	Sun_2	35571	rs4626350	5	30839451	A	G	0.556	0.51	0.01	0	5124.8
VEGFA	Pietzner	10708	rs6921438	6	43925607	A	G	0.48	-0.81	0.01	1e-200	5157.17
IL1R2	Sun_2	35571	rs2310170	2	102616154	G	T	0.399	-0.51	0.01	0	5162.77
SEMA4D	Pietzner	10708	rs45464494	9	91994433	T	C	0.08	-1.49	0.02	1e-200	5217.88
FUT3_FUT5	Sun_2	35571	rs3760775	19	5841356	T	G	0.06	-1.06	0.02	0	5233.1
IL12A_IL12B	Sun_2	35571	rs4244437	5	158773117	A	G	0.677	0.54	0.01	0	5246.3
LCT	Pietzner	10708	rs4988235	2	136608646	A	G	0.69	0.88	0.01	1e-200	5340.06
CLEC10A	Sun_2	35571	rs90951	17	6981397	G	A	0.333	0.54	0.01	0	5360.94
OSCAR	Sun_2	35571	rs4442925	19	54554950	T	C	0.449	0.52	0.01	0	5396.98
AKR1C4	Ferkingstad	35559	rs142122182	10	5263341	G	A	0.187	-0.66	0.01	1e-200	5418.2
TNFAIP6	Ferkingstad	35559	rs2278089	2	152146672	G	T	0.429	0.52	0.01	1e-200	5429.66
NELL1	Ferkingstad	35559	rs8176786	11	20959394	T	C	0.063	1.06	0.01	1e-200	5438.2
TFRC	Sun_2	35571	rs3817672	3	195800811	T	C	0.563	-0.52	0.01	0	5482.52
CDHR5	Sun_2	35571	rs12360820	11	620927	C	A	0.829	0.69	0.01	0	5491.03
IL12B	Sun_2	35571	rs4244437	5	158773117	A	G	0.677	0.56	0.01	0	5581.72
IL10RB	Sun_2	35571	rs2247960	21	34661145	G	A	0.45	0.53	0.01	0	5618.74
PROK2	Pietzner	10708	rs7644362	3	71829242	A	G	0.82	-1.08	0.01	1e-200	5638.02
CLEC4D	Sun_2	35571	rs4242896	12	8688999	C	A	0.571	0.53	0.01	0	5649.74
CLEC6A	Sun_2	35571	rs11045427	12	8606523	A	C	0.215	-0.64	0.01	0	5656.65
OSMR	Sun_2	35571	rs9292723	5	38852572	T	C	0.277	-0.59	0.01	0	5719.05
CES1	Sun_2	35571	rs143168962	16	55849073	G	T	0.057	-1.14	0.02	0	5720.43
COL2A1	Pietzner	10708	rs719008	12	48416052	T	G	0.38	-0.86	0.01	1e-200	5788.5
CLPS	Sun_2	35571	rs2766588	6	35753227	C	T	0.608	0.55	0.01	0	5892.34
ADAM23	Sun_2	35571	rs72933203	2	207311349	A	T	0.103	0.88	0.01	0	5904.37
AOC3	Sun_2	35571	rs33986943	17	41004637	A	G	0.111	-0.85	0.01	0	5969.72
SHMT1	Pietzner	10708	rs4398149	17	18268999	A	G	0.37	-0.88	0.01	1e-200	6006.09
IL2RA	Sun_2	35571	rs12722497	10	6095928	A	C	0.089	0.95	0.01	0	6008.7
TGFBI	Sun_2	35571	rs13159365	5	135389433	T	C	0.51	-0.54	0.01	0	6015.66
HTATIP2	Pietzner	10708	rs10437608	11	20385606	A	G	0.54	0.85	0.01	1e-200	6016.46
LRP11	Pietzner	10708	rs9322225	6	150184882	C	G	0.39	0.87	0.01	1e-200	6025.6
GREM1	Pietzner	10708	rs58658771	15	33001734	A	T	0.18	1.11	0.01	1e-200	6033.81
BLMH	Sun_2	35571	rs1050565	17	28576076	C	T	0.332	0.57	0.01	0	6040.3
MATN3	Sun_2	35571	rs11694716	2	20207619	A	G	0.637	-0.56	0.01	0	6062.97
CGREF1	Sun_2	35571	rs2384572	2	27324751	T	G	0.625	-0.56	0.01	0	6079.29
ADAMTS13	Ferkingstad	35559	rs28647808	9	136305530	G	C	0.106	-0.88	0.01	1e-200	6116.43
TDGF1	Sun_1	3301	rs6769392	3	46617719	A	G	0.248	1.32	0.02	1e-200	6124.06
CPA4	Sun_1	3301	rs34587586	7	129938598	T	G	0.393	-1.17	0.02	1e-200	6211.08
PDIA5	Pietzner	10708	rs3804749	3	122833003	T	C	0.59	-0.87	0.01	1e-200	6275.88
CLUL1	Sun_2	35571	rs12957470	18	591690	C	G	0.286	0.61	0.01	0	6354.12
NPTXR	Sun_2	35571	rs111577133	22	39241262	G	A	0.019	2	0.03	0	6361.88
F7	Pietzner	10708	rs3093253	13	113774092	A	G	0.11	-1.38	0.02	1e-200	6365.73
NT5E	Sun_2	35571	rs2229523	6	86199233	G	A	0.66	-0.59	0.01	0	6454.4
PCSK7	Pietzner	10708	rs35186251	11	117076708	T	C	0.77	1.03	0.01	1e-200	6464.83
TIMP3	Pietzner	10708	rs5754256	22	33159962	T	C	0.72	-0.97	0.01	1e-200	6479.36
LAIR1	Sun_2	35571	rs111949142	19	54870191	A	T	0.184	0.72	0.01	0	6496.6
SLAMF7	Pietzner	10708	rs11581248	1	160720074	T	C	0.13	-1.3	0.02	1e-200	6592.51
CRISP2	Ferkingstad	35559	rs555247	6	49710105	A	G	0.494	0.56	0.01	1e-200	6611.03
ADAM22	Sun_2	35571	rs2279542	7	87564497	G	C	0.505	-0.56	0.01	0	6697.9
CFHR2	Pietzner	10708	rs4085749	1	196920148	T	C	0.23	-1.04	0.01	1e-200	6711.08
NT5C3L	Ferkingstad	35559	rs6503667	17	39982264	G	A	0.292	0.62	0.01	1e-200	6724.16
ART4	Pietzner	10708	rs10772808	12	14990587	A	G	0.4	0.9	0.01	1e-200	6736.51
CSF2RB	Ferkingstad	35559	rs2239749	22	37331305	G	A	0.443	-0.57	0.01	1e-200	6788.72
GSTO1	Pietzner	10708	rs45596840	10	106028154	A	G	0.31	-0.96	0.01	1e-200	6920.51
FCRL2	Sun_2	35571	rs12568320	1	157744004	G	A	0.168	0.76	0.01	0	6931.69
AIF1L	Pietzner	10708	rs2315073	9	133936775	T	C	0.69	-0.96	0.01	1e-200	6968.26
IL27	Folkersen	30000	rs4905	19	4237067	A	G	0.7	0.67	0.01	0	6969.84
OGN	Sun_2	35571	rs7026361	9	95138564	T	G	0.368	0.6	0.01	0	7013.96
OXT	Sun_2	35571	rs877172	20	3049890	G	T	0.313	0.62	0.01	0	7120.8
LILRA2	Sun_2	35571	rs10407899	19	55087711	G	A	0.095	-1	0.01	0	7359.93
CHGB	Sun_2	35571	rs236153	20	5903894	G	A	0.372	-0.61	0.01	0	7363.28
TYRO3	Sun_2	35571	rs8024626	15	41863181	A	G	0.303	-0.64	0.01	0	7376.67
CTSC	Sun_2	35571	rs11600158	11	88070914	G	A	0.099	0.99	0.01	0	7412.78
CCL8	Pietzner	10708	rs1133763	17	32647831	A	C	0.84	1.24	0.01	1e-200	7521.34
HGFAC	Pietzner	10708	rs2498323	4	3451109	A	G	0.1	-1.52	0.02	1e-200	7553.84
MSLN	Sun_2	35571	rs2235503	16	810593	A	C	0.193	0.75	0.01	0	7601.78
PDCD1LG2	Sun_2	35571	rs2381282	9	5514839	C	T	0.44	0.6	0.01	0	7670.24
SEMA5A	Pietzner	10708	rs17329324	5	9547958	C	G	0.9	-1.53	0.02	1e-200	7708.57
IL16	Ferkingstad	35559	rs17875523	15	81596552	T	C	0.087	-1.06	0.01	1e-200	7716.1
KLK10	Ferkingstad	35559	rs2569454	19	51523203	T	C	0.417	-0.61	0.01	1e-200	7854.07
SCG3	Sun_2	35571	rs2606134	15	51973650	C	G	0.757	0.7	0.01	0	7917.83
ICAM1	Sun_1	3301	rs5498	19	10395683	G	A	0.431	-1.2	0.01	1e-200	7933.1
SERPINA11	Sun_2	35571	rs12898137	14	94910582	A	T	0.411	-0.62	0.01	0	7974.26
CRNN	Sun_2	35571	rs10494275	1	152391567	A	G	0.071	-1.18	0.01	0	8058.52
CRELD1	Pietzner	10708	rs7650290	3	9981913	C	G	0.75	1.08	0.01	1e-200	8268.92
ADA	Sun_2	35571	rs11555566	20	43255220	C	T	0.063	1.27	0.02	0	8336.56
ARSA	Sun_2	35571	rs873697	22	51064169	A	G	0.045	1.49	0.02	0	8403.68
FGF5	Sun_2	35571	rs12509595	4	81182554	C	T	0.293	0.68	0.01	0	8428.8
FUT8	Pietzner	10708	rs2127870	14	65796846	C	G	0.79	-1.15	0.01	1e-200	8449.41
CLEC12A	Sun_1	3301	rs2961544	12	10136672	A	G	0.639	-1.25	0.01	1e-200	8519.95
CPPED1	Sun_2	35571	rs2865895	16	12891282	G	C	0.175	0.83	0.01	0	8685.63
TNC	Pietzner	10708	rs1138545	9	117835899	T	C	0.16	1.29	0.01	1e-200	8689.06
ABO	Sun_1	3301	rs505922	9	136149229	C	T	0.313	1.3	0.01	1e-200	8776.61
CRTAC1	Sun_2	35571	rs56007204	10	99625319	T	C	0.212	-0.77	0.01	0	8794.18
CRYZ	Pietzner	10708	rs28602706	1	75199973	T	C	0.46	0.95	0.01	1e-200	8835.69
SFTPA2	Sun_2	35571	rs17886395	10	81318663	G	C	0.132	0.94	0.01	0	8917.78
CD48	Sun_2	35571	rs2295615	1	160654758	G	C	0.137	-0.92	0.01	0	8969.23
LECT2	Ferkingstad	35559	rs62623707	5	135288632	G	A	0.056	-1.39	0.01	1e-200	9031.96
SERPINA12	Sun_2	35571	rs17091005	14	94988407	C	T	0.218	0.77	0.01	0	9067.15
WFIKKN2	Sun_2	35571	rs4591185	17	48909434	A	T	0.658	-0.67	0.01	0	9107.29
CA5A	Sun_2	35571	rs55870502	16	87927222	C	T	0.193	0.81	0.01	0	9122.03
PXN	Sun_2	35571	rs4767884	12	120661977	C	T	0.766	0.76	0.01	0	9172.46
VCAN	Sun_2	35571	rs309559	5	82833369	G	A	0.481	-0.65	0.01	0	9361.59
CCL25	Sun_2	35571	rs2032887	19	8121360	G	A	0.237	0.76	0.01	0	9507.34
XCL1	Sun_2	35571	rs4656599	1	168503386	T	C	0.19	0.83	0.01	0	9615.85
FCRLB	Sun_2	35571	rs61801180	1	161688764	C	G	0.061	1.36	0.02	0	9655.34
FGF2	Sun_2	35571	rs2922979	4	123748616	G	C	0.31	-0.71	0.01	0	9812.56
KAZALD1	Sun_2	35571	rs11190812	10	102824292	A	G	0.04	-1.69	0.02	0	9917.92
PVR	Sun_2	35571	rs2301274	19	45146402	C	T	0.241	-0.78	0.01	0	10157.2
FUT10	Ferkingstad	35559	rs62510527	8	33327402	C	T	0.402	0.68	0	1e-200	10163.7
ENTPD6	Sun_2	35571	rs6050446	20	25195509	G	A	0.967	1.86	0.02	0	10240.6
PLXNB2	Sun_2	35571	rs11547731	22	50722134	C	T	0.653	-0.7	0.01	0	10306.6
CA6	Sun_2	35571	rs3765963	1	9034598	G	A	0.412	0.68	0.01	0	10345.8
TACSTD2	Sun_2	35571	rs7333	1	59041220	T	C	0.165	-0.91	0.01	0	10363.9
CPVL	Sun_2	35571	rs34219043	7	29160604	T	C	0.199	-0.85	0.01	0	10498.1
SPARCL1	Sun_2	35571	rs4693826	4	88431892	C	T	0.355	0.71	0.01	0	10560.7
ERAP1	Pietzner	10708	rs467735	5	96123160	T	C	0.22	1.2	0.01	1e-200	10564.9
RNASE6	Pietzner	10708	rs72669422	14	21251586	A	C	0.76	-1.17	0.01	1e-200	10606.6
PAEP	Sun_2	35571	rs9409964	9	138471928	A	G	0.187	0.87	0.01	0	10624.1
FCGR2A	Sun_1	3301	rs1801274	1	161479745	G	A	0.533	1.24	0.01	1e-200	10766.3
HRG	Pietzner	10708	rs59123177	3	186391274	A	G	0.35	1.05	0.01	1e-200	10900.8
GPR37	Sun_2	35571	rs4141005	7	124128619	C	A	0.262	-0.78	0.01	0	11101.5
HNMT	Sun_2	35571	rs11558538	2	138759649	T	C	0.108	-1.11	0.01	0	11186.7
FCAR	Sun_2	35571	rs12608573	19	55391374	G	C	0.217	0.84	0.01	0	11238.3
LEFTY2	Ferkingstad	35559	rs360059	1	226077132	A	G	0.398	-0.71	0	1e-200	11326.1
CST7	Sun_2	35571	rs227651	20	24929834	G	A	0.231	-0.83	0.01	0	11426
FCRL6	Sun_2	35571	rs55650803	1	159783148	T	C	0.192	-0.89	0.01	0	11580
IL34	Sun_2	35571	rs4985556	16	70694000	A	C	0.122	-1.07	0.01	0	11591
TMEM190	Pietzner	10708	rs4806666	19	55888095	T	C	0.45	-1.03	0.01	1e-200	11648.2
CD200R1	Sun_2	35571	rs16860233	3	112642122	T	C	0.039	1.81	0.02	0	11683.9
LILRA3	Pietzner	10708	rs367070	19	54800500	A	G	0.78	1.23	0.01	1e-200	11720.1
RARRES1	Pietzner	10708	rs61696028	3	158455703	A	C	0.84	-1.4	0.01	1e-200	11849.3
SERPINB8	Sun_2	35571	rs3826616	18	61654463	G	A	0.581	-0.72	0.01	0	12051
KLB	Sun_2	35571	rs13103023	4	39457617	A	G	0.328	-0.76	0.01	0	12183.3
CFHR4	Ferkingstad	35559	rs10494745	1	196887457	A	G	0.165	-0.97	0	1e-200	12429
CST5	Sun_2	35571	rs1799841	20	23860178	G	A	0.436	0.73	0.01	0	12585.3
LAIR2	Sun_2	35571	rs73070113	19	55014172	T	A	0.135	-1.06	0.01	0	12719.6
UMOD	Sun_2	35571	rs12922822	16	20367645	T	C	0.182	-0.96	0.01	0	13474.5
SFTPD	Sun_2	35571	rs721917	10	81706324	G	A	0.418	-0.75	0.01	0	13499.1
SEMA3E	Ferkingstad	35559	rs61729612	7	83037731	G	C	0.147	-1.05	0	1e-200	13545.7
CD70	Sun_2	35571	rs7254538	19	6611336	C	G	0.543	0.75	0.01	0	13573.7
VMO1	Sun_2	35571	rs8078118	17	4690038	A	C	0.417	0.75	0.01	0	13588.3
PVALB	Sun_2	35571	rs4821544	22	37258503	C	T	0.304	-0.81	0.01	0	13657
AMN	Sun_2	35571	rs2295829	14	103389003	C	G	0.39	0.77	0.01	0	13833.2
ADAM15	Sun_2	35571	rs11589479	1	155033308	A	G	0.163	1.02	0.01	0	13956.4
TMPRSS5	Sun_2	35571	rs7114195	11	113561421	C	A	0.639	0.78	0.01	0	13981.4
MAN2B2	Ferkingstad	35559	rs11943337	4	6601978	G	C	0.422	0.77	0	1e-200	14465.5
VSTM1	Sun_2	35571	rs2433724	19	54545531	C	T	0.429	-0.77	0.01	0	14612.5
IL27RA	Ferkingstad	35559	rs35026308	19	14153293	C	T	0.169	-1.02	0	1e-200	14661.2
PSG1	Sun_2	35571	rs12986075	19	43373034	A	G	0.198	-0.96	0.01	0	14778.2
PON2	Sun_2	35571	rs6961624	7	95037661	C	T	0.238	-0.9	0.01	0	14862.4
SIGLEC5	Sun_2	35571	rs1106476	19	52130637	A	T	0.113	-1.21	0.01	0	14866
CD6	Sun_2	35571	rs11230563	11	60776209	T	C	0.347	-0.81	0.01	0	14904.5
LRIG1	Sun_2	35571	rs2306272	3	66434643	C	T	0.288	-0.86	0.01	0	15280.5
IL17RB	Sun_2	35571	rs6445607	3	53877149	T	G	0.624	-0.8	0.01	0	15477.3
IL7R	Sun_2	35571	rs6897932	5	35874575	T	C	0.271	-0.88	0.01	0	15841.7
DPEP1	Sun_2	35571	rs423135	16	89740873	A	G	0.518	0.79	0.01	0	15868
CD276	Sun_2	35571	rs2291014	15	73996359	A	G	0.098	-1.32	0.01	0	15924.9
TXNDC15	Sun_2	35571	rs3733897	5	134223593	G	A	0.135	1.17	0.01	0	16503.2
SIRPB1	Ferkingstad	35559	rs12480515	20	1539165	T	C	0.25	0.92	0	1e-200	16540
LILRB1	Ferkingstad	35559	rs138131257	19	55083602	G	A	0.066	-1.61	0	1e-200	16665.5
CNTN2	Sun_2	35571	rs2071533	1	205012198	G	T	0.866	-1.17	0.01	0	16744.7
SPINK4	Sun_2	35571	rs4879679	9	33234019	T	C	0.843	-1.11	0.01	0	17188.4
GSTZ1	Pietzner	10708	rs7975	14	77793207	A	G	0.32	1.19	0.01	1e-200	17346.6
B3GNT8	Ferkingstad	35559	rs284663	19	41932612	C	T	0.433	-0.82	0	1e-200	17521.8
INHBC	Pietzner	10708	rs3741414	12	57844049	T	C	0.24	-1.31	0.01	1e-200	17704.6
LILRB3	Ferkingstad	35559	rs3745410	19	54720896	G	A	0.066	1.64	0	1e-200	17714.2
CAPG	Sun_2	35571	rs6886	2	85622059	C	T	0.668	-0.87	0.01	0	17988.8
TPSAB1	Sun_2	35571	rs8051930	16	1295818	A	T	0.478	0.83	0.01	0	18499.3
CLEC4C	Sun_2	35571	rs11055602	12	7904111	G	T	0.406	0.85	0.01	0	18883.6
CCL24	Sun_2	35571	rs2024050	7	75460393	G	A	0.895	-1.37	0.01	0	19162.4
FCRL4	Ferkingstad	35559	rs11582663	1	157559122	T	C	0.172	-1.13	0	1e-200	20250.5
CTSH	Sun_2	35571	rs60250730	15	79238144	G	C	0.165	1.15	0.01	0	20681.5
ERAP2	Pietzner	10708	rs2927608	5	96252432	A	G	0.44	1.16	0.01	1e-200	21511.2
CLEC7A	Sun_2	35571	rs16910526	12	10271087	C	A	0.085	-1.56	0.01	0	21561.8
SLAMF8	Sun_2	35571	rs34687326	1	159799910	A	G	0.122	-1.34	0.01	0	22046.8
FOLR3	Sun_2	35571	rs139130389	11	71850156	CTA	C	0.073	1.69	0.01	0	22189.3
KLK1	Sun_2	35571	rs601338	19	49206674	A	G	0.509	0.89	0.01	0	22968.9
GMPR	Pietzner	10708	rs2327958	6	16288615	A	G	0.6	-1.2	0.01	1e-200	23834.9
COL6A1	Pietzner	10708	rs13053065	21	47420723	C	G	0.31	-1.28	0.01	1e-200	24446.6
PILRA	Pietzner	10708	rs2405442	7	99971313	T	C	0.32	1.27	0.01	1e-200	24817.5
ADGRB3	Sun_2	35571	rs3798969	6	69671585	G	A	0.624	-0.94	0.01	0	25120.7
SNCG	Sun_2	35571	rs873110	10	88724619	T	C	0.245	-1.06	0.01	0	25185.8
LY75	Sun_2	35571	rs72957586	2	160762687	A	G	0.557	0.93	0.01	0	26382.1
ACP6	Sun_2	35571	rs2153463	1	147124310	G	T	0.702	1.01	0.01	0	26650.2
LILRB2	Sun_2	35571	rs383925	19	54783521	T	C	0.206	-1.15	0.01	0	27053
FCRL3	Sun_2	35571	rs7522061	1	157668390	C	T	0.484	0.96	0.01	0	30453.3
VTN_SEBOX	Pietzner	10708	rs704	17	26694861	A	G	0.47	1.22	0.01	1e-200	30713.2
IL17RA	Ferkingstad	35559	rs2241047	22	17586583	C	G	0.482	-0.97	0	1e-200	31512.3
MSMB	Ferkingstad	35559	rs10993994	10	51549496	A	G	0.382	-1.02	0	1e-200	34344.2
IFNGR2	Sun_2	35571	rs9808753	21	34787312	G	A	0.141	1.43	0.01	0	34654.2
PDCD6	Sun_2	35571	rs9654451	5	299543	T	C	0.129	-1.48	0.01	0	34803.3
EBI3	Ferkingstad	35559	rs353696	19	4242505	C	T	0.276	-1.12	0	1e-200	35664.7
IL1RAP	Sun_2	35571	rs6444442	3	190346060	G	A	0.846	-1.39	0.01	0	36322.2
CD300LF	Sun_2	35571	rs35489971	17	72700943	G	A	0.812	1.29	0.01	0	37078.5
TLR3	Sun_2	35571	rs3775291	4	187004074	T	C	0.297	-1.15	0.01	0	43196.2
PILRB	Sun_2	35571	rs1859788	7	99971834	G	A	0.682	1.14	0.01	0	45310.9
MEP1B	Sun_2	35571	rs680321	18	29797958	C	T	0.456	-1.07	0.01	0	46363.7
MDGA1	Sun_2	35571	rs9349050	6	37663624	C	T	0.515	-1.08	0.01	0	48796.6
HDGF	Sun_2	35571	rs3806417	1	156711623	A	C	0.335	1.14	0.01	0	49507.2
DKKL1	Sun_2	35571	rs2303759	19	49869051	G	T	0.253	-1.26	0.01	0	52395.2
PNLIPRP2	Sun_2	35571	rs4751995	10	118397884	G	A	0.519	1.13	0.01	0	61948.2
KLK12	Sun_2	35571	rs3745540	19	51535130	G	A	0.583	-1.16	0.01	0	68381.6
LILRB5	Sun_2	35571	rs12975366	19	54759361	C	T	0.395	-1.18	0.01	0	69370.2
CD33	Sun_2	35571	rs2455069	19	51728641	G	A	0.427	1.17	0.01	0	72222.3
TAPBPL	Ferkingstad	35559	rs2041388	12	6562836	A	G	0.265	1.33	0	1e-200	78985.4
PDGFRB	Ferkingstad	35559	rs3816018	5	149508475	C	T	0.478	-1.18	0	1e-200	80980.8
SIRPA	Ferkingstad	35559	rs6136377	20	1896288	G	A	0.36	-1.26	0	1e-200	96684.5
SIGLEC9	Ferkingstad	35559	rs2075803	19	51628529	A	G	0.479	1.23	0	1e-200	109619
VTN	Ferkingstad	35559	rs704	17	26694861	G	A	0.492	-1.28	0	1e-200	160874

## Sheet: Table S2 BIMR outcome
outcome	SNP	chr	pos.outcome	effect_allele.outcome	other_allele.outcome	beta.outcome	se.outcome	pval.outcome	samplesize.outcome	maf.outcome
ANGPTL3	rs10184054	chr2	20981005	G	C	0.0361	0.009368	0.0001164	35361	0.24441
ANGPTL3	rs1065853	chr19	44909969	GGGGGGGTGGT	GGGGGGGGGGT	0.1101	0.016958	8.438e-11	35354	0.05944
ANGPTL3	rs11175664	chr12	65175176	A	G	0.0249	0.042922	0.561828	35356	0.00876
ANGPTL3	rs111876364	chr2	184646503	T	C	0.0154	0.02433	0.526761	35348	0.02814
ANGPTL3	rs112155453	chr17	19867744	G	C	-0.0019	0.014024	0.892233	35353	0.08505
ANGPTL3	rs11233370	chr11	82911365	A	G	0.0824	0.077118	0.285297	35331	0.00268
ANGPTL3	rs113323647	chr2	143155061	G	C	-0.013	0.034628	0.70735	35353	0.01326
ANGPTL3	rs11506727	chr9	8005793	G	C	0.0084	0.009155	0.358887	35363	0.25571
ANGPTL3	rs115095886	chr3	186070104	A	G	-0.017	0.016428	0.300741	35349	0.06225
ANGPTL3	rs11595324	chr10	100219661	C	T	-0.0139	0.025977	0.592594	35356	0.02376
ANGPTL3	rs11631516	chr15	93827914	A	G	0.0061	0.008463	0.471056	35346	0.35425
ANGPTL3	rs116423554	chr4	76954746	T	C	0.0131	0.015675	0.403299	35354	0.06988
ANGPTL3	rs1168124	chr1	62674059	T	C	0.2176	0.008516	5.336e-144	35346	0.33754
ANGPTL3	rs117300236	chr17	46675984	G	A	-0.0099	0.009957	0.320077	35348	0.2346
ANGPTL3	rs117497956	chr7	103514066	G	C	-0.0161	0.036835	0.662052	35357	0.01204
ANGPTL3	rs117725179	chr10	34478547	C	T	-0.0226	0.038744	0.559679	35332	0.01057
ANGPTL3	rs117868510	chr9	108392271	A	G	0.0168	0.020585	0.414437	35351	0.03995
ANGPTL3	rs117943988	chr7	84692321	G	A	-0.04	0.039345	0.309316	35337	0.00961
ANGPTL3	rs118083772	chr7	41383938	T	C	-0.0131	0.071332	0.85429	35341	0.00307
ANGPTL3	rs12193976	chr6	94563482	A	G	-0.0307	0.057736	0.594915	35331	0.00511
ANGPTL3	rs1260326	chr2	27508073	C	T	0.0199	0.008492	0.019112	35361	0.34132
ANGPTL3	rs12652795	chr5	157001782	CCCCATT	ACCCATT	0.0007	0.007936	0.92971	35339	0.40044
ANGPTL3	rs12662735	chr6	134487310	A	C	0	0.007185	0.996479	35361	0.34793
ANGPTL3	rs12740374	chr1	109274968	T	G	0.0044	0.010136	0.664224	35332	0.20782
ANGPTL3	rs12906502	chr15	78357067	T	G	0.0018	0.009395	0.848067	35349	0.25556
ANGPTL3	rs12910436	chr15	88365906	G	A	0.0141	0.011717	0.228813	35338	0.13455
ANGPTL3	rs12944238	chr17	31436355	A	G	-0.014	0.013262	0.291124	35349	0.10089
ANGPTL3	rs13226650	chr7	73602675	G	A	0.0316	0.010049	0.001663	35342	0.196
ANGPTL3	rs13398112	chr2	67601480	CGC	CGT	-0.0181	0.010121	0.073723	35347	0.19949
ANGPTL3	rs138911101	chr15	83432452	G	T	-0.0779	0.071357	0.274971	35354	0.00329
ANGPTL3	rs140613504	chr1	193500925	T	C	-0.0084	0.034517	0.807727	35333	0.01351
ANGPTL3	rs1408566	chr13	107229537	T	C	-0.0056	0.010957	0.609291	35351	0.15856
ANGPTL3	rs141469619	chr11	116843577	G	A	0.0739	0.035795	0.038966	35365	0.01201
ANGPTL3	rs142665780	chr20	18983541	GCACCCTGCCTGCCTCTTGCTGCCT	CCACCCTGCCTGCCTCTTGCTGCCT	-0.0083	0.041677	0.842144	35361	0.00914
ANGPTL3	rs142921362	chr6	63139010	G	A	0.0023	0.016765	0.890878	35338	0.06348
ANGPTL3	rs143739812	chr4	153356357	T	C	-0.0068	0.025074	0.78624	35363	0.02642
ANGPTL3	rs144019272	chr16	10967811	A	G	-0.0119	0.032145	0.711239	35371	0.01549
ANGPTL3	rs144175075	chr22	36485370	T	C	0.0884	0.052264	0.090758	35371	0.00534
ANGPTL3	rs144310047	chr15	44344211	T	G	0.0103	0.021628	0.633913	35351	0.03539
ANGPTL3	rs147243898	chr11	112081459	TCCATCTCTA	CCCATCTCTA	-0.0027	0.022031	0.902459	35352	0.03394
ANGPTL3	rs147440796	chr7	73409437	C	T	-0.0451	0.025558	0.077626	35342	0.02484
ANGPTL3	rs150371564	chr10	29361278	T	A	0.0098	0.054218	0.856562	35351	0.00567
ANGPTL3	rs150791	chr21	42040934	A	G	-0.0198	0.011804	0.093457	35355	0.13178
ANGPTL3	rs1525599	chr2	141021133	A	G	0.008	0.012034	0.506178	35342	0.12955
ANGPTL3	rs1569446	chr6	16114017	G	A	0.0039	0.008127	0.631317	35369	0.48886
ANGPTL3	rs17363522	chr5	116674146	A	G	0.0081	0.030675	0.791738	35349	0.01735
ANGPTL3	rs17410962	chr8	19990569	A	G	0.0785	0.01349	5.91e-09	35356	0.09642
ANGPTL3	rs189879235	chr8	35126897	C	T	-0.0322	0.019211	0.093714	35358	0.0457
ANGPTL3	rs189954364	chr11	97045967	T	C	-0.0153	0.030546	0.616458	35347	0.01778
ANGPTL3	rs1961	chr5	59149566	G	A	0.0097	0.008181	0.235729	35348	0.4023
ANGPTL3	rs199717562	chr1	55026178	G	A	0.0185	0.00952	0.051991	35350	0.23664
ANGPTL3	rs219235	chr7	151258679	A	G	0.0074	0.010175	0.467055	35361	0.19594
ANGPTL3	rs2509971	chr11	62415966	G	A	-0.0114	0.011854	0.336207	35351	0.13408
ANGPTL3	rs2738447	chr19	11116804	C	A	-0.0053	0.008074	0.51153	35369	0.43059
ANGPTL3	rs2738588	chr16	78646858	A	G	-0.0062	0.008119	0.445088	35355	0.44593
ANGPTL3	rs2749036	chr6	52769339	A	T	-0.0017	0.008307	0.837846	35354	0.36222
ANGPTL3	rs2829779	chr21	25495706	A	G	0.0113	0.009362	0.227432	35355	0.24461
ANGPTL3	rs28544889	chr7	130775532	A	C	-0.0134	0.008993	0.136233	35340	0.27493
ANGPTL3	rs28601761	chr8	125487789	G	C	0.0383	0.008141	2.543e-06	35357	0.42975
ANGPTL3	rs311449	chr1	25064907	A	C	-0.0016	0.008766	0.855174	35360	0.32539
ANGPTL3	rs34333692	chr3	55317169	T	C	-0.0099	0.018242	0.587341	35337	0.05066
ANGPTL3	rs35193120	chr8	139122013	A	C	0.0084	0.012204	0.491251	35363	0.12209
ANGPTL3	rs355845	chr2	164767839	A	T	0.0141	0.008437	0.094673	35341	0.34763
ANGPTL3	rs4234798	chr4	7218206	GAGATCCTGC	TAGATCCTGC	-0.0003	0.007722	0.969009	35368	0.4389
ANGPTL3	rs4245791	chr2	43847292	T	C	-0.01	0.008927	0.262652	35350	0.27966
ANGPTL3	rs4395776	chr6	6381296	T	C	-0.0116	0.013676	0.396334	35366	0.09677
ANGPTL3	rs4489092	chr5	91124827	T	G	-0.0084	0.008538	0.32519	35328	0.33826
ANGPTL3	rs45549538	chr18	11982211	T	C	-0.0026	0.016498	0.874779	35356	0.06213
ANGPTL3	rs4598523	chr1	97945060	T	C	-0.0139	0.009468	0.142063	35349	0.24879
ANGPTL3	rs4646257	chr8	18405036	C	T	0.0219	0.01108	0.048085	35365	0.15929
ANGPTL3	rs4809641	chr20	37447464	A	C	-0.0019	0.010545	0.857012	35356	0.19022
ANGPTL3	rs556107	chr1	234717312	T	C	0.0133	0.008215	0.10543	35343	0.4462
ANGPTL3	rs573922	chr15	58447895	T	C	0.0067	0.011863	0.572221	35354	0.13219
ANGPTL3	rs57792106	chr12	127929686	A	C	-0.0084	0.025434	0.741197	35370	0.02539
ANGPTL3	rs58542926	chr19	19268740	TGGAGCTGTATTTGCCTTCCATGGTGCA	CGGAGCTGTATTTGCCTTCCATGGTGCA	0.0612	0.015156	5.39e-05	35341	0.07691
ANGPTL3	rs58593776	chr2	240406167	C	G	-0.0294	0.045348	0.516776	35261	0.00838
ANGPTL3	rs58830878	chr1	5635962	C	G	-0.0068	0.00814	0.403498	35372	0.47641
ANGPTL3	rs59347135	chr8	19892533	G	C	-0.0143	0.019781	0.469725	35356	0.04299
ANGPTL3	rs59882870	chr7	76009103	A	G	0.0067	0.010867	0.537547	35338	0.16061
ANGPTL3	rs6037751	chr20	4083180	A	G	0.005	0.009343	0.592545	35359	0.29267
ANGPTL3	rs6090040	chr20	64060707	C	A	-0.0095	0.008072	0.239226	34858	0.48437
ANGPTL3	rs6102034	chr20	40557950	G	C	-0.0102	0.009049	0.259641	35361	0.26624
ANGPTL3	rs62158853	chr2	113111989	T	C	0.0027	0.007927	0.733384	35344	0.44924
ANGPTL3	rs622871	chr6	31910718	G	A	-0.0062	0.008547	0.468224	35429	0.32877
ANGPTL3	rs6453511	chr5	80272237	G	C	0.0117	0.008067	0.146958	35329	0.43224
ANGPTL3	rs6490794	chr13	23427805	C	G	-0.0028	0.008653	0.746257	35370	0.31043
ANGPTL3	rs6499228	chr16	69504371	G	A	-0.0322	0.016085	0.045303	35358	0.06841
ANGPTL3	rs650865	chr1	244279068	A	G	-0.0173	0.019364	0.371641	35334	0.04417
ANGPTL3	rs6602885	chr10	46235002	A	G	-0.0005	0.01754	0.977258	35314	0.06945
ANGPTL3	rs660745	chr19	48716202	C	T	0.0064	0.008381	0.445109	35366	0.3758
ANGPTL3	rs67215541	chr7	51549770	C	A	-0.0191	0.009744	0.049966	35329	0.2144
ANGPTL3	rs6813330	chr4	105564588	C	T	-0.0179	0.008134	0.027763	35336	0.42359
ANGPTL3	rs7028168	chr9	106022256	G	A	-0.0062	0.014494	0.668814	35353	0.08139
ANGPTL3	rs71541363	chr7	137650524	T	G	-0.0065	0.027878	0.815638	35363	0.02185
ANGPTL3	rs72761286	chr15	100659334	G	C	-0.0303	0.018127	0.094614	35313	0.05268
ANGPTL3	rs72882439	chr6	61929243	C	T	0.0126	0.037501	0.736877	35337	0.01183
ANGPTL3	rs72907256	chr2	190930252	T	C	-0.0077	0.029254	0.79239	35360	0.01953
ANGPTL3	rs72988687	chr3	903530	G	A	-0.0233	0.035249	0.508606	35219	0.01292
ANGPTL3	rs73015021	chr19	11082239	G	A	0.0031	0.01395	0.824138	35367	0.08924
ANGPTL3	rs738408	chr22	43928850	T	C	0.0287	0.009565	0.002694	35360	0.22998
ANGPTL3	rs74558764	chr15	57534813	ACACT	GCACT	-0.0826	0.052045	0.112495	35348	0.00626
ANGPTL3	rs74617384	chr6	160576086	T	A	-0.0284	0.016804	0.091011	35376	0.06155
ANGPTL3	rs74671360	chr11	15156053	G	A	0.018	0.027251	0.508912	35356	0.02031
ANGPTL3	rs7558873	chr2	12486454	A	G	-0.0173	0.014444	0.231022	35359	0.08401
ANGPTL3	rs75614366	chr13	106125045	T	C	-0.0126	0.01339	0.346691	35353	0.10153
ANGPTL3	rs7663772	chr4	88866151	A	G	0.0153	0.007976	0.055077	35337	0.46575
ANGPTL3	rs77301115	chr19	44893716	A	G	0.0045	0.025191	0.858224	35356	0.0254
ANGPTL3	rs77573848	chr5	97083043	A	G	0.0794	0.04517	0.078783	35333	0.00847
ANGPTL3	rs78159704	chr3	16691245	T	C	-0.0627	0.042998	0.14478	35358	0.00886
ANGPTL3	rs78277979	chr18	49750572	A	C	0.0172	0.010988	0.117509	35353	0.16003
ANGPTL3	rs7901624	chr10	19540750	A	G	0.0074	0.009635	0.442468	35345	0.23102
ANGPTL3	rs79192210	chr19	58049944	T	G	0.0309	0.023601	0.190444	35147	0.02916
ANGPTL3	rs79429216	chr19	44942260	A	G	0.0797	0.049103	0.104564	35356	0.0064
ANGPTL3	rs79694606	chr5	149811236	A	G	0.0257	0.018764	0.170795	35357	0.0476
ANGPTL3	rs79711323	chr17	62717483	T	C	0.0053	0.011288	0.638695	35356	0.15089
ANGPTL3	rs79866533	chr14	51894636	C	T	-0.0286	0.038232	0.454418	35356	0.01065
ANGPTL3	rs8191752	chr6	160026975	G	C	-0.0685	0.025699	0.007689	35378	0.02502
ANGPTL3	rs881214	chr16	81532945	A	G	0.0084	0.008015	0.294613	35363	0.45904
ANGPTL3	rs927173	chr20	56439671	C	G	0.0031	0.009463	0.743224	35373	0.23671
ANGPTL3	rs9488860	chr6	116174554	T	G	-0.0133	0.00816	0.10314	35341	0.43212
ANGPTL3	rs964184	chr11	116778201	C	G	-0.1133	0.012133	9.779e-21	35365	0.12321
APOA5	rs10184054	2	20981005	G	C	0.0137	0.009384	0.144324	35373	0.24441
APOA5	rs1065853	19	44909969	GGGGGGGTGGT	GGGGGGGGGGT	0.1686	0.017004	3.58e-23	35366	0.05944
APOA5	rs11175664	12	65175176	A	G	-0.0725	0.043056	0.092213	35368	0.00876
APOA5	rs111876364	2	184646503	T	C	0.0154	0.024514	0.529859	35360	0.02814
APOA5	rs112155453	17	19867744	G	C	-0.0061	0.014267	0.668979	35365	0.08505
APOA5	rs11233370	11	82911365	A	G	0.0207	0.079841	0.795431	35343	0.00268
APOA5	rs113323647	2	143155061	G	C	0.0311	0.034822	0.371797	35365	0.01326
APOA5	rs115095886	3	186070104	A	G	0.0192	0.016519	0.245117	35361	0.06225
APOA5	rs11595324	10	100219661	C	T	0.0244	0.026152	0.350811	35368	0.02376
APOA5	rs11631516	15	93827914	A	G	-0.0019	0.008489	0.822893	35358	0.35425
APOA5	rs116423554	4	76954746	T	C	-0.0172	0.015763	0.275195	35366	0.06988
APOA5	rs1168124	1	62674059	T	C	0.0438	0.008524	2.77e-07	35358	0.33754
APOA5	rs117300236	17	46675984	G	A	-0.0083	0.009976	0.405407	35360	0.2346
APOA5	rs117725179	10	34478547	C	T	0.0608	0.03888	0.117871	35344	0.01057
APOA5	rs1260326	2	27508073	C	T	-0.0751	0.008522	1.22e-18	35373	0.34132
APOA5	rs12740374	1	109274968	T	G	0.0108	0.009963	0.278365	35344	0.20782
APOA5	rs12906502	15	78357067	T	G	-0.0053	0.009171	0.563346	35361	0.25556
APOA5	rs12910436	15	88365906	G	A	-0.0018	0.011985	0.880617	35350	0.13455
APOA5	rs12944238	17	31436355	A	G	-0.004	0.01322	0.762214	35361	0.10089
APOA5	rs13398112	2	67601480	CGC	CGT	-0.0106	0.010183	0.297893	35359	0.19949
APOA5	rs138911101	15	83432452	G	T	0.0518	0.071533	0.468977	35366	0.00329
APOA5	rs140613504	1	193500925	T	C	-0.0087	0.034554	0.801211	35345	0.01351
APOA5	rs1408566	13	107229537	T	C	0.0016	0.011006	0.884417	35363	0.15856
APOA5	rs141469619	11	116843577	G	A	0.3538	0.036984	1.11e-21	35377	0.01201
APOA5	rs142665780	20	18983541	GCACCCTGCCTGCCTCTTGCTGCCT	CCACCCTGCCTGCCTCTTGCTGCCT	0.0705	0.041739	0.091209	35373	0.00914
APOA5	rs144019272	16	10967811	A	G	0.0428	0.032217	0.184014	35383	0.01549
APOA5	rs144175075	22	36485370	T	C	0.0013	0.052246	0.980149	35383	0.00534
APOA5	rs144310047	15	44344211	T	G	-0.0014	0.022502	0.95039	35363	0.03539
APOA5	rs147243898	11	112081459	TCCATCTCTA	CCCATCTCTA	-0.0067	0.023074	0.771532	35364	0.03394
APOA5	rs150371564	10	29361278	T	A	0.0193	0.054526	0.72337	35363	0.00567
APOA5	rs150791	21	42040934	A	G	-0.0229	0.011868	0.053671	35367	0.13178
APOA5	rs1525599	2	141021133	A	G	0.0022	0.012061	0.855259	35354	0.12955
APOA5	rs189954364	11	97045967	T	C	-0.0771	0.03157	0.014597	35359	0.01778
APOA5	rs199717562	1	55026178	G	A	0.0078	0.009429	0.408096	35362	0.23664
APOA5	rs2509971	11	62415966	G	A	0.0088	0.01228	0.473631	35363	0.13408
APOA5	rs2738447	19	11116804	C	A	0.006	0.008141	0.461141	35381	0.43059
APOA5	rs2738588	16	78646858	A	G	0.0031	0.008239	0.706728	35367	0.44593
APOA5	rs2829779	21	25495706	A	G	-0.0107	0.009395	0.25473	35367	0.24461
APOA5	rs311449	1	25064907	A	C	-0.0012	0.008599	0.889021	35372	0.32539
APOA5	rs34333692	3	55317169	T	C	-0.0014	0.018103	0.938358	35349	0.05066
APOA5	rs355845	2	164767839	A	T	0.0095	0.008452	0.261007	35353	0.34763
APOA5	rs4234798	4	7218206	GAGATCCTGC	TAGATCCTGC	0.0018	0.008106	0.824273	35380	0.4389
APOA5	rs4245791	2	43847292	T	C	-0.014	0.008987	0.119286	35362	0.27966
APOA5	rs45549538	18	11982211	T	C	-0.0327	0.016591	0.048727	35368	0.06213
APOA5	rs4598523	1	97945060	T	C	0.0295	0.009415	0.001728	35361	0.24879
APOA5	rs4809641	20	37447464	A	C	0.0114	0.010278	0.267362	35368	0.19022
APOA5	rs556107	1	234717312	T	C	0.022	0.00812	0.006741	35355	0.4462
APOA5	rs573922	15	58447895	T	C	-0.0522	0.011921	1.19e-05	35366	0.13219
APOA5	rs57792106	12	127929686	A	C	-0.0043	0.025964	0.868463	35382	0.02539
APOA5	rs58542926	19	19268740	TGGAGCTGTATTTGCCTTCCATGGTGCA	CGGAGCTGTATTTGCCTTCCATGGTGCA	-0.0523	0.01522	0.0005898	35353	0.07691
APOA5	rs58593776	2	240406167	C	G	0.0058	0.045719	0.89905	35273	0.00838
APOA5	rs58830878	1	5635962	C	G	-0.0004	0.007589	0.957967	35384	0.47641
APOA5	rs6037751	20	4083180	A	G	0.0013	0.009405	0.890064	35371	0.29267
APOA5	rs6090040	20	64060707	C	A	-0.0026	0.007921	0.742724	34870	0.48437
APOA5	rs6102034	20	40557950	G	C	-0.0097	0.009129	0.28797	35373	0.26624
APOA5	rs62158853	2	113111989	T	C	0.0067	0.008025	0.403799	35356	0.44924
APOA5	rs6490794	13	23427805	C	G	0.0022	0.008662	0.799498	35382	0.31043
APOA5	rs6499228	16	69504371	G	A	0.0101	0.016127	0.531142	35370	0.06841
APOA5	rs650865	1	244279068	A	G	-0.0085	0.019187	0.657767	35346	0.04417
APOA5	rs6602885	10	46235002	A	G	-0.0023	0.016313	0.887877	35326	0.06945
APOA5	rs660745	19	48716202	C	T	-0.0109	0.008321	0.190242	35378	0.3758
APOA5	rs6813330	4	105564588	C	T	0.0036	0.008105	0.656919	35348	0.42359
APOA5	rs72761286	15	100659334	G	C	0.0188	0.018216	0.302043	35325	0.05268
APOA5	rs72907256	2	190930252	T	C	0.0324	0.02952	0.272397	35372	0.01953
APOA5	rs72988687	3	903530	G	A	-0.0448	0.03535	0.205039	35231	0.01292
APOA5	rs73015021	19	11082239	G	A	0.006	0.014167	0.671915	35379	0.08924
APOA5	rs738408	22	43928850	T	C	-0.0192	0.009567	0.044758	35372	0.22998
APOA5	rs74558764	15	57534813	ACACT	GCACT	-0.0411	0.052263	0.43163	35360	0.00626
APOA5	rs74671360	11	15156053	G	A	0.0006	0.026154	0.981697	35368	0.02031
APOA5	rs7558873	2	12486454	A	G	-0.0094	0.014471	0.515979	35371	0.08401
APOA5	rs75614366	13	106125045	T	C	-0.0293	0.013444	0.029303	35365	0.10153
APOA5	rs7663772	4	88866151	A	G	0.0016	0.008267	0.846528	35349	0.46575
APOA5	rs77301115	19	44893716	A	G	-0.0827	0.025209	0.001036	35368	0.0254
APOA5	rs78159704	3	16691245	T	C	0.0534	0.043145	0.215834	35370	0.00886
APOA5	rs78277979	18	49750572	A	C	-0.0052	0.010966	0.635357	35365	0.16003
APOA5	rs7901624	10	19540750	A	G	0.0079	0.009644	0.412718	35357	0.23102
APOA5	rs79192210	19	58049944	T	G	0.0082	0.023579	0.728017	35159	0.02916
APOA5	rs79429216	19	44942260	A	G	0.0066	0.04937	0.893652	35368	0.0064
APOA5	rs79711323	17	62717483	T	C	-0.0169	0.011316	0.135328	35368	0.15089
APOA5	rs79866533	14	51894636	C	T	-0.0326	0.038352	0.395313	35368	0.01065
APOA5	rs881214	16	81532945	A	G	0.006	0.00807	0.457175	35375	0.45904
APOA5	rs927173	20	56439671	C	G	0.0126	0.009513	0.185348	35385	0.23671
APOA5	rs964184	11	116778201	C	G	-0.3689	0.012425	1.01e-193	35377	0.12321
APOC3	rs11175664	12	65175176	A	G	-0.0334	0.043562	0.443244	35368	0.00876
APOC3	rs11233370	11	82911365	A	G	-0.1071	0.078542	0.172695	35343	0.00268
APOC3	rs11595324	10	100219661	C	T	0.031	0.026428	0.240798	35368	0.02376
APOC3	rs11631516	15	93827914	A	G	-0.0135	0.008607	0.116787	35358	0.35425
APOC3	rs1168124	1	62674059	T	C	0.0791	0.008632	5.03e-20	35358	0.33754
APOC3	rs117725179	10	34478547	C	T	-0.0065	0.039616	0.869671	35344	0.01057
APOC3	rs12740374	1	109274968	T	G	-0.0043	0.010016	0.667709	35344	0.20782
APOC3	rs12906502	15	78357067	T	G	0.0032	0.009237	0.729004	35361	0.25556
APOC3	rs12910436	15	88365906	G	A	-0.0056	0.011974	0.640012	35350	0.13455
APOC3	rs138911101	15	83432452	G	T	0.0477	0.072639	0.511394	35366	0.00329
APOC3	rs140613504	1	193500925	T	C	-0.0144	0.034961	0.680422	35345	0.01351
APOC3	rs1408566	13	107229537	T	C	-0.0151	0.011226	0.178578	35363	0.15856
APOC3	rs141469619	11	116843577	G	A	0.2635	0.036467	4.99e-13	35377	0.01201
APOC3	rs144019272	16	10967811	A	G	-0.016	0.032742	0.625073	35383	0.01549
APOC3	rs144310047	15	44344211	T	G	0.0778	0.021976	0.0003997	35363	0.03539
APOC3	rs147243898	11	112081459	TCCATCTCTA	CCCATCTCTA	-0.0212	0.022673	0.349781	35364	0.03394
APOC3	rs150371564	10	29361278	T	A	0.0276	0.055143	0.616712	35363	0.00567
APOC3	rs189954364	11	97045967	T	C	-0.0492	0.031094	0.113587	35359	0.01778
APOC3	rs199717562	1	55026178	G	A	0.0167	0.009591	0.081651	35362	0.23664
APOC3	rs2509971	11	62415966	G	A	0.0092	0.012027	0.4443	35363	0.13408
APOC3	rs311449	1	25064907	A	C	0.0081	0.008671	0.350229	35372	0.32539
APOC3	rs4598523	1	97945060	T	C	0.0012	0.009249	0.896772	35361	0.24879
APOC3	rs556107	1	234717312	T	C	0.006	0.008167	0.462518	35355	0.4462
APOC3	rs573922	15	58447895	T	C	-0.0731	0.012073	1.41e-09	35366	0.13219
APOC3	rs57792106	12	127929686	A	C	-0.0325	0.025994	0.21119	35382	0.02539
APOC3	rs58830878	1	5635962	C	G	-0.0095	0.00824	0.248919	35384	0.47641
APOC3	rs6490794	13	23427805	C	G	0.0054	0.008809	0.53987	35382	0.31043
APOC3	rs6499228	16	69504371	G	A	-0.0065	0.016297	0.690009	35370	0.06841
APOC3	rs650865	1	244279068	A	G	-0.0126	0.019424	0.516545	35346	0.04417
APOC3	rs6602885	10	46235002	A	G	0.0147	0.016367	0.369092	35326	0.06945
APOC3	rs72761286	15	100659334	G	C	-0.0018	0.018271	0.92152	35325	0.05268
APOC3	rs74558764	15	57534813	ACACT	GCACT	0.0363	0.052886	0.492475	35360	0.00626
APOC3	rs74671360	11	15156053	G	A	0.0324	0.027764	0.243219	35368	0.02031
APOC3	rs75614366	13	106125045	T	C	-0.0081	0.013587	0.551064	35365	0.10153
APOC3	rs7901624	10	19540750	A	G	0.011	0.00974	0.25873	35357	0.23102
APOC3	rs79866533	14	51894636	C	T	-0.0238	0.038831	0.539936	35368	0.01065
APOC3	rs964184	11	116778201	C	G	-0.2105	0.012335	2.68e-65	35377	0.12321
BCAM	rs10184054	2	20981005	G	C	0.0013	0.00988	0.895315	35373	0.24441
BCAM	rs1065853	19	44909969	GGGGGGGTGGT	GGGGGGGGGGT	0.0249	0.017748	0.160634	35366	0.05944
BCAM	rs11175664	12	65175176	A	G	0.0062	0.043939	0.887786	35368	0.00876
BCAM	rs111876364	2	184646503	T	C	-0.0068	0.025248	0.787674	35360	0.02814
BCAM	rs112155453	17	19867744	G	C	-0.0231	0.014747	0.117261	35365	0.08505
BCAM	rs11233370	11	82911365	A	G	-0.1825	0.079446	0.02161	35343	0.00268
BCAM	rs113323647	2	143155061	G	C	-0.0128	0.035797	0.720666	35365	0.01326
BCAM	rs11506727	9	8005793	G	C	-0.0121	0.009499	0.202725	35375	0.25571
BCAM	rs115095886	3	186070104	A	G	-0.004	0.016834	0.812178	35361	0.06225
BCAM	rs11595324	10	100219661	C	T	0.0183	0.02684	0.495354	35368	0.02376
BCAM	rs11631516	15	93827914	A	G	-0.0171	0.008715	0.049757	35358	0.35425
BCAM	rs116423554	4	76954746	T	C	-0.0028	0.016331	0.863871	35366	0.06988
BCAM	rs1168124	1	62674059	T	C	-0.0057	0.008674	0.511084	35358	0.33754
BCAM	rs117300236	17	46675984	G	A	0.0267	0.01021	0.008923	35360	0.2346
BCAM	rs117497956	7	103514066	G	C	0.029	0.037999	0.445357	35369	0.01204
BCAM	rs117725179	10	34478547	C	T	0.0306	0.03999	0.444159	35344	0.01057
BCAM	rs117868510	9	108392271	A	G	0.0188	0.02135	0.378563	35363	0.03995
BCAM	rs117943988	7	84692321	G	A	0.0068	0.0404	0.866333	35349	0.00961
BCAM	rs118083772	7	41383938	T	C	0.0208	0.073723	0.777837	35353	0.00307
BCAM	rs12193976	6	94563482	A	G	-0.1324	0.059509	0.02609	35343	0.00511
BCAM	rs1260326	2	27508073	C	T	0.0187	0.008772	0.033018	35373	0.34132
BCAM	rs12652795	5	157001782	CCCCATT	ACCCATT	-0.0112	0.008426	0.183776	35351	0.40044
BCAM	rs12662735	6	134487310	A	C	-0.0082	0.00875	0.348665	35373	0.34793
BCAM	rs12740374	1	109274968	T	G	-0.0014	0.010541	0.894337	35344	0.20782
BCAM	rs12906502	15	78357067	T	G	-0.0114	0.0095	0.230138	35361	0.25556
BCAM	rs12910436	15	88365906	G	A	0.0039	0.012248	0.750171	35350	0.13455
BCAM	rs12944238	17	31436355	A	G	-0.0018	0.013655	0.895125	35361	0.10089
BCAM	rs13226650	7	73602675	G	A	0.0244	0.010396	0.018928	35354	0.196
BCAM	rs13398112	2	67601480	CGC	CGT	-0.0022	0.010487	0.833838	35359	0.19949
BCAM	rs138911101	15	83432452	G	T	0.0369	0.073464	0.615464	35366	0.00329
BCAM	rs140613504	1	193500925	T	C	0.0331	0.035326	0.348772	35345	0.01351
BCAM	rs1408566	13	107229537	T	C	-0.0188	0.011336	0.097231	35363	0.15856
BCAM	rs141469619	11	116843577	G	A	0.0306	0.036939	0.40745	35377	0.01201
BCAM	rs142665780	20	18983541	GCACCCTGCCTGCCTCTTGCTGCCT	CCACCCTGCCTGCCTCTTGCTGCCT	0.0171	0.042773	0.689312	35373	0.00914
BCAM	rs142921362	6	63139010	G	A	-0.0126	0.017094	0.461073	35350	0.06348
BCAM	rs143739812	4	153356357	T	C	0.0257	0.026011	0.323139	35375	0.02642
BCAM	rs144019272	16	10967811	A	G	-0.0079	0.032959	0.810567	35383	0.01549
BCAM	rs144175075	22	36485370	T	C	-0.003	0.054382	0.956007	35383	0.00534
BCAM	rs144310047	15	44344211	T	G	-0.0099	0.022221	0.655945	35363	0.03539
BCAM	rs147243898	11	112081459	TCCATCTCTA	CCCATCTCTA	0.0415	0.022907	0.070037	35364	0.03394
BCAM	rs147440796	7	73409437	C	T	-0.0071	0.026411	0.788062	35354	0.02484
BCAM	rs150371564	10	29361278	T	A	0.008	0.056386	0.887175	35363	0.00567
BCAM	rs150791	21	42040934	A	G	-0.0162	0.012185	0.183691	35367	0.13178
BCAM	rs1525599	2	141021133	A	G	0.013	0.012403	0.294582	35354	0.12955
BCAM	rs1569446	6	16114017	G	A	-0.0097	0.008313	0.243279	35381	0.48886
BCAM	rs17363522	5	116674146	A	G	-0.0204	0.03159	0.518428	35361	0.01735
BCAM	rs17410962	8	19990569	A	G	-0.0071	0.013958	0.61099	35368	0.09642
BCAM	rs189879235	8	35126897	C	T	-0.0252	0.019736	0.20166	35370	0.0457
BCAM	rs189954364	11	97045967	T	C	-0.005	0.031287	0.873032	35359	0.01778
BCAM	rs1961	5	59149566	G	A	0.0089	0.00842	0.290481	35360	0.4023
BCAM	rs199717562	1	55026178	G	A	0.0205	0.009719	0.03492	35362	0.23664
BCAM	rs219235	7	151258679	A	G	0.0075	0.010521	0.475934	35373	0.19594
BCAM	rs2509971	11	62415966	G	A	-0.0071	0.012271	0.562871	35363	0.13408
BCAM	rs2738447	19	11116804	C	A	-0.0034	0.00862	0.693274	35381	0.43059
BCAM	rs2738588	16	78646858	A	G	0.009	0.008359	0.281641	35367	0.44593
BCAM	rs2749036	6	52769339	A	T	-0.0056	0.008595	0.514685	35366	0.36222
BCAM	rs2829779	21	25495706	A	G	-0.009	0.009688	0.352882	35367	0.24461
BCAM	rs28544889	7	130775532	A	C	0.0025	0.009108	0.783712	35352	0.27493
BCAM	rs28601761	8	125487789	G	C	0.0124	0.008363	0.138138	35369	0.42975
BCAM	rs311449	1	25064907	A	C	-0.0007	0.008301	0.932796	35372	0.32539
BCAM	rs34333692	3	55317169	T	C	-0.0391	0.018843	0.03798	35349	0.05066
BCAM	rs35193120	8	139122013	A	C	0.0034	0.012479	0.785277	35375	0.12209
BCAM	rs355845	2	164767839	A	T	-0.0003	0.008134	0.970579	35353	0.34763
BCAM	rs4234798	4	7218206	GAGATCCTGC	TAGATCCTGC	-0.0042	0.008402	0.617173	35380	0.4389
BCAM	rs4245791	2	43847292	T	C	0.0005	0.010066	0.960382	35362	0.27966
BCAM	rs4395776	6	6381296	T	C	-0.003	0.014255	0.833317	35378	0.09677
BCAM	rs4489092	5	91124827	T	G	-0.0101	0.008757	0.248777	35340	0.33826
BCAM	rs45549538	18	11982211	T	C	-0.0186	0.017042	0.275077	35368	0.06213
BCAM	rs4598523	1	97945060	T	C	-0.0027	0.009767	0.782212	35361	0.24879
BCAM	rs4646257	8	18405036	C	T	-0.0258	0.011394	0.023554	35377	0.15929
BCAM	rs4809641	20	37447464	A	C	0.0041	0.010544	0.697386	35368	0.19022
BCAM	rs556107	1	234717312	T	C	0.0182	0.008363	0.029538	35355	0.4462
BCAM	rs573922	15	58447895	T	C	0.0031	0.012074	0.797365	35366	0.13219
BCAM	rs57792106	12	127929686	A	C	-0.0181	0.026418	0.493252	35382	0.02539
BCAM	rs58542926	19	19268740	TGGAGCTGTATTTGCCTTCCATGGTGCA	CGGAGCTGTATTTGCCTTCCATGGTGCA	0.0497	0.015875	0.001744	35353	0.07691
BCAM	rs58593776	2	240406167	C	G	0.043	0.04678	0.357988	35273	0.00838
BCAM	rs58830878	1	5635962	C	G	-0.0022	0.008283	0.79054	35384	0.47641
BCAM	rs59347135	8	19892533	G	C	0.0079	0.020443	0.699169	35368	0.04299
BCAM	rs59882870	7	76009103	A	G	0.0144	0.011186	0.19799	35350	0.16061
BCAM	rs6037751	20	4083180	A	G	-0.0023	0.009594	0.810546	35371	0.29267
BCAM	rs6090040	20	64060707	C	A	-0.0053	0.008347	0.525434	34870	0.48437
BCAM	rs6102034	20	40557950	G	C	0.0103	0.00935	0.270654	35373	0.26624
BCAM	rs62158853	2	113111989	T	C	0.0055	0.008358	0.510483	35356	0.44924
BCAM	rs622871	6	31910718	G	A	0.0065	0.008822	0.46124	35441	0.32877
BCAM	rs6453511	5	80272237	G	C	-0.0076	0.00831	0.360408	35341	0.43224
BCAM	rs6490794	13	23427805	C	G	-0.0075	0.00899	0.40414	35382	0.31043
BCAM	rs6499228	16	69504371	G	A	-0.0064	0.016607	0.699952	35370	0.06841
BCAM	rs650865	1	244279068	A	G	-0.0083	0.019749	0.674284	35346	0.04417
BCAM	rs6602885	10	46235002	A	G	0.0028	0.016889	0.868322	35326	0.06945
BCAM	rs660745	19	48716202	C	T	0.0415	0.0087	1.84e-06	35378	0.3758
BCAM	rs67215541	7	51549770	C	A	-0.0068	0.010074	0.499658	35341	0.2144
BCAM	rs6813330	4	105564588	C	T	-0.0059	0.008339	0.479269	35348	0.42359
BCAM	rs7028168	9	106022256	G	A	0.0073	0.015054	0.627742	35365	0.08139
BCAM	rs71541363	7	137650524	T	G	-0.0283	0.028799	0.325762	35375	0.02185
BCAM	rs72761286	15	100659334	G	C	0.0033	0.018931	0.861617	35325	0.05268
BCAM	rs72882439	6	61929243	C	T	-0.0625	0.03855	0.10496	35349	0.01183
BCAM	rs72907256	2	190930252	T	C	-0.0048	0.030625	0.875452	35372	0.01953
BCAM	rs72988687	3	903530	G	A	0.0159	0.036417	0.662392	35231	0.01292
BCAM	rs73015021	19	11082239	G	A	-0.0015	0.014955	0.920106	35379	0.08924
BCAM	rs738408	22	43928850	T	C	0.0077	0.009894	0.436431	35372	0.22998
BCAM	rs74558764	15	57534813	ACACT	GCACT	-0.0529	0.053618	0.323831	35360	0.00626
BCAM	rs74617384	6	160576086	T	A	-0.0436	0.017362	0.012033	35388	0.06155
BCAM	rs74671360	11	15156053	G	A	0.0344	0.028064	0.220282	35368	0.02031
BCAM	rs7558873	2	12486454	A	G	0.0021	0.014966	0.888411	35371	0.08401
BCAM	rs75614366	13	106125045	T	C	-0.0014	0.013809	0.919245	35365	0.10153
BCAM	rs7663772	4	88866151	A	G	0.0074	0.008226	0.368315	35349	0.46575
BCAM	rs77301115	19	44893716	A	G	-0.0789	0.02629	0.00269	35368	0.0254
BCAM	rs77573848	5	97083043	A	G	0.0906	0.046549	0.051614	35345	0.00847
BCAM	rs78159704	3	16691245	T	C	-0.0684	0.044328	0.122821	35370	0.00886
BCAM	rs78277979	18	49750572	A	C	-0.0023	0.011237	0.837819	35365	0.16003
BCAM	rs7901624	10	19540750	A	G	0.0001	0.008673	0.990801	35357	0.23102
BCAM	rs79192210	19	58049944	T	G	-0.0123	0.024709	0.618625	35159	0.02916
BCAM	rs79429216	19	44942260	A	G	0.0712	0.05138	0.165822	35368	0.0064
BCAM	rs79694606	5	149811236	A	G	0.0184	0.019329	0.341139	35369	0.0476
BCAM	rs79711323	17	62717483	T	C	0.002	0.011498	0.86191	35368	0.15089
BCAM	rs79866533	14	51894636	C	T	-0.0598	0.039442	0.129482	35368	0.01065
BCAM	rs8191752	6	160026975	G	C	-0.0164	0.026488	0.535822	35390	0.02502
BCAM	rs881214	16	81532945	A	G	-0.0025	0.008203	0.76055	35375	0.45904
BCAM	rs927173	20	56439671	C	G	0.0178	0.00978	0.068763	35385	0.23671
BCAM	rs9488860	6	116174554	T	G	-0.0072	0.008433	0.393203	35353	0.43212
BCAM	rs964184	11	116778201	C	G	-0.023	0.012516	0.066124	35377	0.12321
GCKR	rs10184054	2	20981005	G	C	-0.0054	0.009188	0.556699	35373	0.24441
GCKR	rs1065853	19	44909969	GGGGGGGTGGT	GGGGGGGGGGT	0.0246	0.016753	0.142009	35366	0.05944
GCKR	rs11175664	12	65175176	A	G	-0.0137	0.042269	0.745849	35368	0.00876
GCKR	rs111876364	2	184646503	T	C	-0.0201	0.024022	0.402741	35360	0.02814
GCKR	rs112155453	17	19867744	G	C	-0.012	0.014134	0.395857	35365	0.08505
GCKR	rs11233370	11	82911365	A	G	-0.0983	0.07623	0.197215	35343	0.00268
GCKR	rs113323647	2	143155061	G	C	-0.0647	0.034343	0.059576	35365	0.01326
GCKR	rs11506727	9	8005793	G	C	0.001	0.009414	0.915402	35375	0.25571
GCKR	rs115095886	3	186070104	A	G	0.0196	0.016271	0.228369	35361	0.06225
GCKR	rs11595324	10	100219661	C	T	0.0249	0.025779	0.334088	35368	0.02376
GCKR	rs11631516	15	93827914	A	G	0.0024	0.008503	0.777757	35358	0.35425
GCKR	rs116423554	4	76954746	T	C	-0.0122	0.015512	0.431571	35366	0.06988
GCKR	rs1168124	1	62674059	T	C	-0.0045	0.008448	0.594252	35358	0.33754
GCKR	rs117300236	17	46675984	G	A	-0.0092	0.009772	0.346443	35360	0.2346
GCKR	rs117497956	7	103514066	G	C	0.0142	0.036515	0.697364	35369	0.01204
GCKR	rs117725179	10	34478547	C	T	0.0364	0.038225	0.340969	35344	0.01057
GCKR	rs117868510	9	108392271	A	G	0.0173	0.020414	0.396747	35363	0.03995
GCKR	rs117943988	7	84692321	G	A	0.021	0.039009	0.590346	35349	0.00961
GCKR	rs118083772	7	41383938	T	C	-0.1148	0.070648	0.104172	35353	0.00307
GCKR	rs12193976	6	94563482	A	G	-0.0369	0.057022	0.517554	35343	0.00511
GCKR	rs1260326	2	27508073	C	T	0.0866	0.008392	5.75e-25	35373	0.34132
GCKR	rs12652795	5	157001782	CCCCATT	ACCCATT	-0.0057	0.008092	0.481158	35351	0.40044
GCKR	rs12662735	6	134487310	A	C	-0.0115	0.008348	0.168315	35373	0.34793
GCKR	rs12740374	1	109274968	T	G	-0.0061	0.009768	0.532287	35344	0.20782
GCKR	rs12906502	15	78357067	T	G	-0.0157	0.009102	0.084557	35361	0.25556
GCKR	rs12910436	15	88365906	G	A	-0.0066	0.011602	0.569436	35350	0.13455
GCKR	rs12944238	17	31436355	A	G	-0.0085	0.013106	0.516635	35361	0.10089
GCKR	rs13226650	7	73602675	G	A	-0.0016	0.009834	0.87076	35354	0.196
GCKR	rs13398112	2	67601480	CGC	CGT	-0.0163	0.009986	0.102628	35359	0.19949
GCKR	rs138911101	15	83432452	G	T	-0.0095	0.070374	0.892618	35366	0.00329
GCKR	rs140613504	1	193500925	T	C	0.072	0.033878	0.033562	35345	0.01351
GCKR	rs1408566	13	107229537	T	C	-0.0101	0.010915	0.354809	35363	0.15856
GCKR	rs141469619	11	116843577	G	A	0.0377	0.03542	0.287165	35377	0.01201
GCKR	rs142665780	20	18983541	GCACCCTGCCTGCCTCTTGCTGCCT	CCACCCTGCCTGCCTCTTGCTGCCT	0.0368	0.041132	0.370963	35373	0.00914
GCKR	rs142921362	6	63139010	G	A	-0.0294	0.016398	0.072986	35350	0.06348
GCKR	rs143739812	4	153356357	T	C	0.027	0.024971	0.27959	35375	0.02642
GCKR	rs144019272	16	10967811	A	G	-0.0087	0.031605	0.783107	35383	0.01549
GCKR	rs144175075	22	36485370	T	C	0.0885	0.051704	0.086958	35383	0.00534
GCKR	rs144310047	15	44344211	T	G	0.0631	0.021376	0.003158	35363	0.03539
GCKR	rs147243898	11	112081459	TCCATCTCTA	CCCATCTCTA	0.0076	0.022062	0.730481	35364	0.03394
GCKR	rs147440796	7	73409437	C	T	0.0207	0.025269	0.412681	35354	0.02484
GCKR	rs150371564	10	29361278	T	A	0.0154	0.053668	0.77415	35363	0.00567
GCKR	rs150791	21	42040934	A	G	-0.0116	0.011664	0.319977	35367	0.13178
GCKR	rs1525599	2	141021133	A	G	0.0126	0.011929	0.290854	35354	0.12955
GCKR	rs1569446	6	16114017	G	A	0.0013	0.008046	0.871649	35381	0.48886
GCKR	rs17363522	5	116674146	A	G	0.0016	0.030012	0.957484	35361	0.01735
GCKR	rs17410962	8	19990569	A	G	-0.0291	0.013332	0.029058	35368	0.09642
GCKR	rs189879235	8	35126897	C	T	-0.0205	0.018961	0.279616	35370	0.0457
GCKR	rs189954364	11	97045967	T	C	0.0244	0.030135	0.418111	35359	0.01778
GCKR	rs1961	5	59149566	G	A	0.0051	0.008056	0.526684	35360	0.4023
GCKR	rs199717562	1	55026178	G	A	0.0097	0.009283	0.296083	35362	0.23664
GCKR	rs219235	7	151258679	A	G	0.003	0.010163	0.767859	35373	0.19594
GCKR	rs2509971	11	62415966	G	A	-0.0044	0.011608	0.704642	35363	0.13408
GCKR	rs2738447	19	11116804	C	A	0.0106	0.008035	0.187101	35381	0.43059
GCKR	rs2738588	16	78646858	A	G	0.0053	0.008062	0.510927	35367	0.44593
GCKR	rs2749036	6	52769339	A	T	-0.0164	0.008303	0.04824	35366	0.36222
GCKR	rs2829779	21	25495706	A	G	-0.015	0.009244	0.104671	35367	0.24461
GCKR	rs28544889	7	130775532	A	C	0.0069	0.008908	0.438581	35352	0.27493
GCKR	rs28601761	8	125487789	G	C	-0.0105	0.008077	0.193599	35369	0.42975
GCKR	rs311449	1	25064907	A	C	0.0093	0.008496	0.273692	35372	0.32539
GCKR	rs34333692	3	55317169	T	C	-0.0264	0.01804	0.143363	35349	0.05066
GCKR	rs35193120	8	139122013	A	C	0.0037	0.012025	0.758316	35375	0.12209
GCKR	rs355845	2	164767839	A	T	-0.0069	0.008319	0.406887	35353	0.34763
GCKR	rs4234798	4	7218206	GAGATCCTGC	TAGATCCTGC	-0.0001	0.006537	0.987794	35380	0.4389
GCKR	rs4245791	2	43847292	T	C	-0.0052	0.00887	0.557721	35362	0.27966
GCKR	rs4395776	6	6381296	T	C	-0.0232	0.013566	0.087231	35378	0.09677
GCKR	rs4489092	5	91124827	T	G	-0.0106	0.00844	0.209144	35340	0.33826
GCKR	rs45549538	18	11982211	T	C	-0.0125	0.016397	0.445852	35368	0.06213
GCKR	rs4598523	1	97945060	T	C	-0.0027	0.009301	0.771596	35361	0.24879
GCKR	rs4646257	8	18405036	C	T	-0.0033	0.01097	0.763557	35377	0.15929
GCKR	rs4809641	20	37447464	A	C	-0.0139	0.01013	0.169997	35368	0.19022
GCKR	rs556107	1	234717312	T	C	0.0149	0.007994	0.062332	35355	0.4462
GCKR	rs573922	15	58447895	T	C	0.0124	0.011764	0.291838	35366	0.13219
GCKR	rs57792106	12	127929686	A	C	-0.0208	0.025309	0.411162	35382	0.02539
GCKR	rs58542926	19	19268740	TGGAGCTGTATTTGCCTTCCATGGTGCA	CGGAGCTGTATTTGCCTTCCATGGTGCA	0.0231	0.014974	0.122921	35353	0.07691
GCKR	rs58593776	2	240406167	C	G	-0.0719	0.044852	0.108925	35273	0.00838
GCKR	rs58830878	1	5635962	C	G	-0.0022	0.008046	0.784515	35384	0.47641
GCKR	rs59347135	8	19892533	G	C	-0.0024	0.019758	0.90332	35368	0.04299
GCKR	rs59882870	7	76009103	A	G	0.006	0.010831	0.579598	35350	0.16061
GCKR	rs6037751	20	4083180	A	G	-0.0108	0.009308	0.245951	35371	0.29267
GCKR	rs6090040	20	64060707	C	A	-0.0023	0.008051	0.775116	34870	0.48437
GCKR	rs6102034	20	40557950	G	C	0.0068	0.008939	0.446826	35373	0.26624
GCKR	rs62158853	2	113111989	T	C	0.0206	0.007942	0.009491	35356	0.44924
GCKR	rs622871	6	31910718	G	A	0.0392	0.008407	3.12e-06	35441	0.32877
GCKR	rs6453511	5	80272237	G	C	-0.0065	0.007996	0.416264	35341	0.43224
GCKR	rs6490794	13	23427805	C	G	-0.0102	0.008551	0.23291	35382	0.31043
GCKR	rs6499228	16	69504371	G	A	-0.0032	0.015729	0.838789	35370	0.06841
GCKR	rs650865	1	244279068	A	G	-0.0175	0.018853	0.353283	35346	0.04417
GCKR	rs6602885	10	46235002	A	G	0.0113	0.015891	0.477027	35326	0.06945
GCKR	rs660745	19	48716202	C	T	0.0195	0.008215	0.017613	35378	0.3758
GCKR	rs67215541	7	51549770	C	A	-0.0157	0.009625	0.102872	35341	0.2144
GCKR	rs6813330	4	105564588	C	T	0.0042	0.008034	0.601129	35348	0.42359
GCKR	rs7028168	9	106022256	G	A	-0.0108	0.014448	0.454759	35365	0.08139
GCKR	rs71541363	7	137650524	T	G	-0.0027	0.028034	0.923273	35375	0.02185
GCKR	rs72761286	15	100659334	G	C	0.0142	0.017967	0.429342	35325	0.05268
GCKR	rs72882439	6	61929243	C	T	-0.0268	0.036875	0.467365	35349	0.01183
GCKR	rs72907256	2	190930252	T	C	0.0082	0.028965	0.7771	35372	0.01953
GCKR	rs72988687	3	903530	G	A	-0.0677	0.034865	0.052163	35231	0.01292
GCKR	rs73015021	19	11082239	G	A	-0.0181	0.013928	0.19377	35379	0.08924
GCKR	rs738408	22	43928850	T	C	0.0117	0.009451	0.215732	35372	0.22998
GCKR	rs74558764	15	57534813	ACACT	GCACT	0.0314	0.051464	0.54177	35360	0.00626
GCKR	rs74617384	6	160576086	T	A	-0.0283	0.016645	0.089088	35388	0.06155
GCKR	rs74671360	11	15156053	G	A	-0.0298	0.026931	0.268491	35368	0.02031
GCKR	rs7558873	2	12486454	A	G	-0.0023	0.014195	0.871284	35371	0.08401
GCKR	rs75614366	13	106125045	T	C	-0.0094	0.013194	0.476186	35365	0.10153
GCKR	rs7663772	4	88866151	A	G	-0.0028	0.007815	0.720122	35349	0.46575
GCKR	rs77301115	19	44893716	A	G	0.0196	0.024808	0.429483	35368	0.0254
GCKR	rs77573848	5	97083043	A	G	0.041	0.044612	0.358078	35345	0.00847
GCKR	rs78159704	3	16691245	T	C	0.011	0.042387	0.79524	35370	0.00886
GCKR	rs78277979	18	49750572	A	C	0.0051	0.01075	0.635194	35365	0.16003
GCKR	rs7901624	10	19540750	A	G	0.0109	0.009502	0.251338	35357	0.23102
GCKR	rs79192210	19	58049944	T	G	-0.0233	0.023371	0.318779	35159	0.02916
GCKR	rs79429216	19	44942260	A	G	0.0415	0.048607	0.393221	35368	0.0064
GCKR	rs79694606	5	149811236	A	G	0.0419	0.018519	0.023661	35369	0.0476
GCKR	rs79711323	17	62717483	T	C	0.0004	0.011827	0.97302	35368	0.15089
GCKR	rs79866533	14	51894636	C	T	-0.0558	0.037744	0.139308	35368	0.01065
GCKR	rs8191752	6	160026975	G	C	0.032	0.025418	0.208051	35390	0.02502
GCKR	rs881214	16	81532945	A	G	-0.0033	0.007984	0.679358	35375	0.45904
GCKR	rs927173	20	56439671	C	G	0.0216	0.009353	0.020915	35385	0.23671
GCKR	rs9488860	6	116174554	T	G	0.0094	0.008046	0.242712	35353	0.43212
GCKR	rs964184	11	116778201	C	G	-0.0295	0.011991	0.013884	35377	0.12321
KLK1	rs10184054	2	20981005	G	C	0.0026	0.007392	0.725038	46665	0.22149
KLK1	rs10557733	12	52217122	T	!	0.0029	0.006877	0.673234	46663	0.29057
KLK1	rs1065853	19	44909976	T	!	0.0203	0.012998	0.11833	46663	0.0806853
KLK1	rs11175664	12	65175176	A	G	0.0007	0.033774	0.983464	46663	0.0102026
KLK1	rs111876364	2	184646503	T	C	-0.0181	0.017301	0.295484	46663	0.0344474
KLK1	rs112155453	17	19867744	G	!	0.0002	0.008809	0.981886	46664	0.111744
KLK1	rs11233370	11	82911365	A	G	0.0007	0.030831	0.981886	46665	0.0125823
KLK1	rs113323647	2	143155061	G	C	0.0075	0.018084	0.67834	46661	0.031436
KLK1	rs114562459	2	226202472	G	!	-0.0018	0.007153	0.801325	46665	0.680836
KLK1	rs11506727	9	8005793	G	!	0.009	0.007358	0.22127	46659	0.231393
KLK1	rs115095886	3	186070104	A	G	0.0066	0.014806	0.655756	46661	0.0481048
KLK1	rs11595324	10	100219661	C	T	0.017	0.015598	0.275763	46665	0.0417867
KLK1	rs11631516	15	93827914	A	G	-0.0024	0.006646	0.717999	46661	0.372496
KLK1	rs116423554	4	76954746	T	C	-0.0029	0.011124	0.794333	46664	0.0876043
KLK1	rs1168124	1	62674059	T	C	-0.0011	0.006957	0.874364	46665	0.647875
KLK1	rs117300236	17	46675984	G	A	0.0009	0.008357	0.914237	46664	0.772513
KLK1	rs117497956	7	103514066	G	!	0.0183	0.021584	0.396523	46663	0.0216447
KLK1	rs117725179	10	34478547	C	T	-0.0062	0.020802	0.765663	46664	0.0233901
KLK1	rs117868510	9	108392271	A	G	-0.0013	0.015584	0.933517	46664	0.0361945
KLK1	rs117943988	7	84692321	G	A	0.0254	0.022076	0.249901	46664	0.0215052
KLK1	rs118083772	7	41383938	T	C	-0.0044	0.030452	0.885114	46664	0.0112203
KLK1	rs12193976	6	94563482	A	G	-0.0494	0.026835	0.065637	46655	0.0136414
KLK1	rs1260326	2	27508073	C	!	0.0291	0.006413	5.68e-06	46665	0.607631
KLK1	rs12652795	5	157001782	C	A	-0.0055	0.006536	0.400073	46665	0.375007
KLK1	rs12662735	6	134487310	A	!	-0.0037	0.006678	0.579544	46653	0.335809
KLK1	rs12740374	1	109274968	T	G	-0.0088	0.007584	0.24593	46664	0.221999
KLK1	rs12906502	15	78357067	T	!	-0.0024	0.006753	0.722306	46664	0.281341
KLK1	rs12910436	15	88365906	G	A	-0.0152	0.009252	0.100395	46657	0.131175
KLK1	rs12944238	17	31436355	A	G	0.0117	0.010048	0.244279	46664	0.108574
KLK1	rs13226650	7	73602675	G	A	-0.0044	0.007639	0.5646	46665	0.199698
KLK1	rs13398112	2	67601482	C	T	0.0106	0.00787	0.17804	46664	0.204306
KLK1	rs138911101	15	83432452	G	T	-0.0406	0.03617	0.261664	46665	0.00734847
KLK1	rs140613504	1	193500925	T	C	0.0004	0.024915	0.987191	46662	0.0208543
KLK1	rs1408566	13	107229537	T	C	-0.0051	0.009165	0.577904	46662	0.859364
KLK1	rs141023861	5	24495895	A	C	-0.015	0.020329	0.460599	46658	0.0247988
KLK1	rs141469619	11	116843577	G	!	-0.0688	0.029696	0.020515	46661	0.011254
KLK1	rs142665780	20	18983541	G	C	0.0212	0.030933	0.493128	46661	0.0106019
KLK1	rs142921362	6	63139010	G	A	-0.0079	0.015039	0.599363	46661	0.043159
KLK1	rs143739812	4	153356357	T	C	0.015	0.016376	0.359672	46662	0.0377035
KLK1	rs144019272	16	10967811	A	G	-0.0298	0.026745	0.265189	46665	0.014695
KLK1	rs144175075	22	36485370	T	C	-0.0401	0.039066	0.304667	46662	0.00682402
KLK1	rs144310047	15	44344211	T	G	-0.047	0.019788	0.017539	46661	0.0259268
KLK1	rs147243898	11	112081459	T	C	-0.0154	0.015724	0.32738	46664	0.041313
KLK1	rs147440796	7	73409437	C	!	-0.019	0.016345	0.245073	46665	0.0393732
KLK1	rs150371564	10	29361278	T	A	-0.0454	0.034947	0.193904	46663	0.00821467
KLK1	rs150791	21	42040934	A	G	0.0049	0.010332	0.635314	46658	0.111209
KLK1	rs1525599	2	141021133	A	G	0.0066	0.009752	0.498556	46663	0.117006
KLK1	rs1569446	6	16114017	G	A	0.0075	0.006231	0.228739	46664	0.446405
KLK1	rs17363522	5	116674146	A	G	-0.0441	0.026252	0.092979	46663	0.014179
KLK1	rs17410962	8	19990569	A	!	0.0117	0.009692	0.227377	46664	0.117573
KLK1	rs189879235	8	35126897	C	T	-0.0084	0.015134	0.578855	46664	0.0449996
KLK1	rs189954364	11	97045967	T	C	0.0035	0.017362	0.840239	46659	0.0322445
KLK1	rs1961	5	59149566	G	!	0.0049	0.006484	0.449833	46664	0.400397
KLK1	rs199717562	1	55026178	G	A	-0.0022	0.007435	0.767319	46663	0.255406
KLK1	rs219235	7	151258679	A	G	-0.0029	0.007435	0.696485	46664	0.218721
KLK1	rs2509971	11	62415966	G	A	0.0137	0.008964	0.126441	46663	0.856034
KLK1	rs2738447	19	11116804	C	A	0.006	0.007478	0.422354	46665	0.59342
KLK1	rs2749036	6	52769339	A	T	0.004	0.006431	0.533948	46663	0.605968
KLK1	rs2829779	21	25495706	A	G	0.0066	0.007088	0.35175	46664	0.735644
KLK1	rs28544889	7	130775532	A	C	0.0066	0.006596	0.31703	46662	0.321616
KLK1	rs28601761	8	125487789	G	C	0.0004	0.005984	0.946709	46663	0.420407
KLK1	rs311449	1	25064907	A	!	0.0015	0.006863	0.826993	46662	0.307001
KLK1	rs34333692	3	55317169	T	!	-0.0013	0.016195	0.936021	46664	0.0355172
KLK1	rs35193120	8	139122013	A	!	0.0124	0.009469	0.190346	46652	0.126537
KLK1	rs355845	2	164767839	A	T	0.0137	0.006476	0.034399	46664	0.62095
KLK1	rs4234798	4	7218206	G	!	0.0004	0.005272	0.939522	46664	0.616064
KLK1	rs4245791	2	43847292	T	C	0.0082	0.006782	0.226639	46665	0.67459
KLK1	rs4395776	6	6381296	T	C	-0.0044	0.009016	0.625542	46657	0.865826
KLK1	rs4489092	5	91124827	T	!	0.006	0.006444	0.351774	46658	0.631248
KLK1	rs45549538	18	11982211	T	C	-0.0141	0.013402	0.292752	46659	0.058724
KLK1	rs4598523	1	97945060	T	!	0.0112	0.007577	0.139371	46663	0.780292
KLK1	rs4646257	8	18405036	C	T	-0.0128	0.008099	0.114025	46664	0.818991
KLK1	rs4809641	20	37447464	A	C	-0.0035	0.00862	0.684712	46662	0.151995
KLK1	rs556107	1	234717312	T	C	-0.0071	0.006444	0.27053	46656	0.522771
KLK1	rs573922	15	58447895	T	C	0.0033	0.00817	0.686272	46657	0.835099
KLK1	rs57792106	12	127929686	A	C	-0.0086	0.014678	0.557923	46653	0.0490118
KLK1	rs58542926	19	19268740	T	C	-0.0232	0.013757	0.091714	46663	0.0752141
KLK1	rs58593776	2	240406167	C	G	0.0053	0.039087	0.892142	46663	0.00677225
KLK1	rs58830878	1	5635962	C	G	0.0044	0.006338	0.487566	46662	0.456784
KLK1	rs59347135	8	19892533	G	C	-0.0057	0.014671	0.697628	46665	0.0452813
KLK1	rs59882870	7	76009103	A	G	0.0132	0.008504	0.120617	46665	0.16284
KLK1	rs6037751	20	4083180	A	G	-0.0011	0.007506	0.883483	46664	0.726855
KLK1	rs6090040	20	64060707	C	!	0.0079	0.006128	0.197343	46665	0.520336
KLK1	rs6102034	20	40557950	G	!	-0.0026	0.006721	0.698858	46658	0.329046
KLK1	rs61942442	12	107169628	T	!	0.0459	0.02498	0.066138	46664	0.0156071
KLK1	rs62158853	2	113111989	T	C	-0.0018	0.006317	0.775692	46665	0.399351
KLK1	rs622871	6	31910718	G	A	0.0018	0.006853	0.792814	46665	0.684309
KLK1	rs6453511	5	80272237	G	!	0.002	0.006263	0.749466	46664	0.576822
KLK1	rs6490794	13	23427805	C	G	-0.002	0.00706	0.776967	46655	0.689428
KLK1	rs6499228	16	69504371	G	A	0.0117	0.011162	0.294539	46663	0.0896419
KLK1	rs650865	1	244279068	A	G	-0.0165	0.016033	0.303428	46656	0.959903
KLK1	rs6602885	10	46235002	A	G	-0.0024	0.010527	0.819656	46649	0.101868
KLK1	rs660745	19	48716202	C	T	0.7524	0.004166	0	46665	0.548163
KLK1	rs67215541	7	51549770	C	A	0.0068	0.007814	0.384164	46663	0.205616
KLK1	rs6813330	4	105564588	C	T	-0.0009	0.005987	0.880514	46655	0.367467
KLK1	rs7028168	9	106022256	G	A	-0.0119	0.010098	0.238621	46660	0.109428
KLK1	rs71541363	7	137650524	T	G	0.0077	0.023716	0.745423	46656	0.0175809
KLK1	rs72761286	15	100659334	G	C	0.0115	0.014914	0.440641	46662	0.0474986
KLK1	rs72882439	6	61929243	C	T	0.0353	0.028856	0.221204	46659	0.0123807
KLK1	rs72907256	2	190930252	T	C	0.0095	0.023186	0.682006	46664	0.0192284
KLK1	rs72988687	3	903530	G	A	0.0165	0.022024	0.453746	46661	0.0204795
KLK1	rs73015021	19	11082239	G	!	0.0022	0.010625	0.835968	46665	0.119197
KLK1	rs738408	22	43928850	T	C	0.0075	0.007599	0.323639	46661	0.215511
KLK1	rs74466321	16	49008364	T	C	-0.0117	0.016295	0.472737	46664	0.0392513
KLK1	rs74558764	15	57534813	A	G	0.0315	0.02862	0.271056	46663	0.0122202
KLK1	rs74617384	6	160576086	T	!	0.0051	0.011377	0.653952	46665	0.0807094
KLK1	rs74671360	11	15156053	G	A	-0.0251	0.023057	0.276337	46663	0.0189836
KLK1	rs7558873	2	12486454	A	G	0.0095	0.010146	0.349115	46664	0.108331
KLK1	rs75614366	13	106125045	T	C	0.0124	0.011751	0.291333	46657	0.079205
KLK1	rs7663772	4	88866151	A	G	0.0068	0.006319	0.281837	46663	0.40023
KLK1	rs77301115	19	44893716	A	G	0.0018	0.023047	0.937747	46663	0.0258732
KLK1	rs77573848	5	97083043	A	!	0.0165	0.027009	0.541259	46664	0.0137893
KLK1	rs78159704	3	16691245	T	C	-0.0181	0.02341	0.439422	46663	0.0182878
KLK1	rs78277979	18	49750572	A	C	0.0124	0.0089	0.163534	46665	0.145269
KLK1	rs7901624	10	19540750	A	G	-0.0035	0.00745	0.638496	46663	0.771512
KLK1	rs79192210	19	58049944	T	G	0.0086	0.015924	0.589146	46664	0.053903
KLK1	rs79429216	19	44942260	A	G	0.0205	0.032063	0.522589	46665	0.0122374
KLK1	rs79694606	5	149811236	A	G	0.0082	0.015273	0.591349	46663	0.0451822
KLK1	rs79711323	17	62717483	T	C	-0.0066	0.009118	0.469144	46665	0.139928
KLK1	rs79866533	14	51894636	C	T	-0.004	0.031558	0.899137	46663	0.0102983
KLK1	rs8191752	6	160026975	G	C	-0.021	0.021289	0.323917	46665	0.0209866
KLK1	rs881214	16	81532945	A	!	0.0046	0.006266	0.462908	46661	0.493041
KLK1	rs927173	20	56439671	C	G	-0.0117	0.007311	0.109546	46661	0.245182
KLK1	rs9488860	6	116174554	T	!	-0.0135	0.006329	0.03291	46665	0.425449
KLK1	rs964184	11	116778201	C	G	0.017	0.009169	0.063715	46663	0.867604
NCAN	rs10184054	2	20981005	G	C	-0.0056	0.009909	0.571973	35373	0.24441
NCAN	rs1065853	19	44909969	GGGGGGGTGGT	GGGGGGGGGGT	0.0101	0.017951	0.573669	35366	0.05944
NCAN	rs11175664	12	65175176	A	G	0.0317	0.045435	0.485369	35368	0.00876
NCAN	rs111876364	2	184646503	T	C	0.0143	0.025734	0.578428	35360	0.02814
NCAN	rs112155453	17	19867744	G	C	-0.0222	0.015136	0.142455	35365	0.08505
NCAN	rs11233370	11	82911365	A	G	0.0133	0.081456	0.870299	35343	0.00268
NCAN	rs113323647	2	143155061	G	C	0.0005	0.035995	0.988917	35365	0.01326
NCAN	rs11506727	9	8005793	G	C	-0.0012	0.009576	0.900276	35375	0.25571
NCAN	rs115095886	3	186070104	A	G	-0.0237	0.017445	0.174276	35361	0.06225
NCAN	rs11595324	10	100219661	C	T	0.0158	0.02755	0.566302	35368	0.02376
NCAN	rs11631516	15	93827914	A	G	-0.0019	0.008734	0.827795	35358	0.35425
NCAN	rs116423554	4	76954746	T	C	-0.0153	0.016648	0.358073	35366	0.06988
NCAN	rs1168124	1	62674059	T	C	0.0017	0.008893	0.848392	35358	0.33754
NCAN	rs117300236	17	46675984	G	A	0.044	0.010493	2.75e-05	35360	0.2346
NCAN	rs117497956	7	103514066	G	C	0.0065	0.038838	0.867084	35369	0.01204
NCAN	rs117725179	10	34478547	C	T	0.0044	0.040792	0.914103	35344	0.01057
NCAN	rs117868510	9	108392271	A	G	-0.0207	0.021838	0.343177	35363	0.03995
NCAN	rs117943988	7	84692321	G	A	-0.0138	0.041794	0.741254	35349	0.00961
NCAN	rs118083772	7	41383938	T	C	0.1062	0.075657	0.160406	35353	0.00307
NCAN	rs12193976	6	94563482	A	G	-0.0661	0.061158	0.27978	35343	0.00511
NCAN	rs1260326	2	27508073	C	T	0.0302	0.00901	0.0008032	35373	0.34132
NCAN	rs12652795	5	157001782	CCCCATT	ACCCATT	-0.0104	0.008664	0.229989	35351	0.40044
NCAN	rs12662735	6	134487310	A	C	-0.0127	0.008949	0.155846	35373	0.34793
NCAN	rs12740374	1	109274968	T	G	-0.0051	0.010473	0.626275	35344	0.20782
NCAN	rs12906502	15	78357067	T	G	0.007	0.009785	0.474395	35361	0.25556
NCAN	rs12910436	15	88365906	G	A	0.0064	0.012508	0.608893	35350	0.13455
NCAN	rs12944238	17	31436355	A	G	-0.0222	0.014089	0.115104	35361	0.10089
NCAN	rs13226650	7	73602675	G	A	-0.0033	0.010598	0.755502	35354	0.196
NCAN	rs13398112	2	67601480	CGC	CGT	-0.0055	0.010662	0.605943	35359	0.19949
NCAN	rs138911101	15	83432452	G	T	-0.1222	0.075512	0.105603	35366	0.00329
NCAN	rs140613504	1	193500925	T	C	-0.0281	0.036377	0.439843	35345	0.01351
NCAN	rs1408566	13	107229537	T	C	0.0018	0.011838	0.879149	35363	0.15856
NCAN	rs141469619	11	116843577	G	A	0.0158	0.037958	0.677227	35377	0.01201
NCAN	rs142665780	20	18983541	GCACCCTGCCTGCCTCTTGCTGCCT	CCACCCTGCCTGCCTCTTGCTGCCT	0.0195	0.044061	0.658075	35373	0.00914
NCAN	rs142921362	6	63139010	G	A	0.0003	0.016386	0.985393	35350	0.06348
NCAN	rs143739812	4	153356357	T	C	-0.0296	0.026715	0.267873	35375	0.02642
NCAN	rs144019272	16	10967811	A	G	0.0264	0.03398	0.4372	35383	0.01549
NCAN	rs144175075	22	36485370	T	C	0.0114	0.055194	0.836367	35383	0.00534
NCAN	rs144310047	15	44344211	T	G	-0.0366	0.022913	0.110191	35363	0.03539
NCAN	rs147243898	11	112081459	TCCATCTCTA	CCCATCTCTA	0.0075	0.023421	0.748798	35364	0.03394
NCAN	rs147440796	7	73409437	C	T	0.0264	0.027128	0.330467	35354	0.02484
NCAN	rs150371564	10	29361278	T	A	-0.0487	0.057425	0.396405	35363	0.00567
NCAN	rs150791	21	42040934	A	G	-0.0134	0.012497	0.283604	35367	0.13178
NCAN	rs1525599	2	141021133	A	G	0.0009	0.012205	0.941215	35354	0.12955
NCAN	rs1569446	6	16114017	G	A	0.0085	0.008573	0.321431	35381	0.48886
NCAN	rs17363522	5	116674146	A	G	-0.0013	0.032912	0.968492	35361	0.01735
NCAN	rs17410962	8	19990569	A	G	0.007	0.014191	0.621811	35368	0.09642
NCAN	rs189879235	8	35126897	C	T	0.0122	0.020325	0.548341	35370	0.0457
NCAN	rs189954364	11	97045967	T	C	-0.0256	0.032247	0.427264	35359	0.01778
NCAN	rs1961	5	59149566	G	A	0.0075	0.008664	0.386689	35360	0.4023
NCAN	rs199717562	1	55026178	G	A	0.0157	0.009993	0.116147	35362	0.23664
NCAN	rs219235	7	151258679	A	G	0.0027	0.010877	0.803954	35373	0.19594
NCAN	rs2509971	11	62415966	G	A	0.0037	0.012468	0.766642	35363	0.13408
NCAN	rs2738447	19	11116804	C	A	-0.0041	0.008689	0.637025	35381	0.43059
NCAN	rs2738588	16	78646858	A	G	0.0103	0.008528	0.227142	35367	0.44593
NCAN	rs2749036	6	52769339	A	T	-0.0052	0.008893	0.558709	35366	0.36222
NCAN	rs2829779	21	25495706	A	G	-0.0076	0.009942	0.444598	35367	0.24461
NCAN	rs28544889	7	130775532	A	C	-0.0013	0.009314	0.888997	35352	0.27493
NCAN	rs28601761	8	125487789	G	C	-0.0064	0.008625	0.458069	35369	0.42975
NCAN	rs311449	1	25064907	A	C	-0.0161	0.009104	0.076998	35372	0.32539
NCAN	rs34333692	3	55317169	T	C	-0.0147	0.019414	0.448931	35349	0.05066
NCAN	rs35193120	8	139122013	A	C	0.0054	0.012957	0.676841	35375	0.12209
NCAN	rs355845	2	164767839	A	T	-0.0073	0.008967	0.415573	35353	0.34763
NCAN	rs4234798	4	7218206	GAGATCCTGC	TAGATCCTGC	-0.0078	0.00856	0.362179	35380	0.4389
NCAN	rs4245791	2	43847292	T	C	0.0083	0.009421	0.378315	35362	0.27966
NCAN	rs4395776	6	6381296	T	C	-0.0153	0.014527	0.292236	35378	0.09677
NCAN	rs4489092	5	91124827	T	G	-0.0162	0.009021	0.072526	35340	0.33826
NCAN	rs45549538	18	11982211	T	C	-0.019	0.017487	0.277259	35368	0.06213
NCAN	rs4598523	1	97945060	T	C	0.0088	0.009982	0.377991	35361	0.24879
NCAN	rs4646257	8	18405036	C	T	-0.0024	0.011887	0.839989	35377	0.15929
NCAN	rs4809641	20	37447464	A	C	0.0011	0.010998	0.920328	35368	0.19022
NCAN	rs556107	1	234717312	T	C	0.0098	0.008596	0.25424	35355	0.4462
NCAN	rs573922	15	58447895	T	C	-0.0015	0.012618	0.905375	35366	0.13219
NCAN	rs57792106	12	127929686	A	C	-0.0046	0.027124	0.865333	35382	0.02539
NCAN	rs58542926	19	19268740	TGGAGCTGTATTTGCCTTCCATGGTGCA	CGGAGCTGTATTTGCCTTCCATGGTGCA	-0.2347	0.016031	1.56e-48	35353	0.07691
NCAN	rs58593776	2	240406167	C	G	-0.0326	0.048019	0.497201	35273	0.00838
NCAN	rs58830878	1	5635962	C	G	-0.0074	0.008565	0.387581	35384	0.47641
NCAN	rs59347135	8	19892533	G	C	-0.0098	0.020881	0.638829	35368	0.04299
NCAN	rs59882870	7	76009103	A	G	0.0068	0.011467	0.553169	35350	0.16061
NCAN	rs6037751	20	4083180	A	G	-0.005	0.010016	0.617621	35371	0.29267
NCAN	rs6090040	20	64060707	C	A	-0.0224	0.008517	0.008537	34870	0.48437
NCAN	rs6102034	20	40557950	G	C	0.0058	0.009563	0.544179	35373	0.26624
NCAN	rs62158853	2	113111989	T	C	-0.0008	0.008056	0.920895	35356	0.44924
NCAN	rs622871	6	31910718	G	A	0.0095	0.009058	0.294266	35441	0.32877
NCAN	rs6453511	5	80272237	G	C	-0.0065	0.008595	0.449482	35341	0.43224
NCAN	rs6490794	13	23427805	C	G	-0.0072	0.009231	0.435396	35382	0.31043
NCAN	rs6499228	16	69504371	G	A	-0.0127	0.016986	0.454665	35370	0.06841
NCAN	rs650865	1	244279068	A	G	0.011	0.020267	0.587303	35346	0.04417
NCAN	rs6602885	10	46235002	A	G	0.0141	0.016941	0.405241	35326	0.06945
NCAN	rs660745	19	48716202	C	T	0.005	0.00888	0.573393	35378	0.3758
NCAN	rs67215541	7	51549770	C	A	0.008	0.010272	0.436073	35341	0.2144
NCAN	rs6813330	4	105564588	C	T	-0.0051	0.008572	0.551869	35348	0.42359
NCAN	rs7028168	9	106022256	G	A	-0.0028	0.015458	0.856263	35365	0.08139
NCAN	rs71541363	7	137650524	T	G	-0.0093	0.029541	0.752902	35375	0.02185
NCAN	rs72761286	15	100659334	G	C	0.0128	0.019247	0.506036	35325	0.05268
NCAN	rs72882439	6	61929243	C	T	-0.0152	0.039513	0.700471	35349	0.01183
NCAN	rs72907256	2	190930252	T	C	0.0199	0.031197	0.523552	35372	0.01953
NCAN	rs72988687	3	903530	G	A	-0.001	0.038433	0.979242	35231	0.01292
NCAN	rs73015021	19	11082239	G	A	-0.0012	0.015147	0.936856	35379	0.08924
NCAN	rs738408	22	43928850	T	C	0.0148	0.010088	0.142361	35372	0.22998
NCAN	rs74558764	15	57534813	ACACT	GCACT	-0.0457	0.055027	0.406252	35360	0.00626
NCAN	rs74617384	6	160576086	T	A	-0.014	0.017853	0.43293	35388	0.06155
NCAN	rs74671360	11	15156053	G	A	0.0116	0.028671	0.685782	35368	0.02031
NCAN	rs7558873	2	12486454	A	G	-0.0114	0.015227	0.454046	35371	0.08401
NCAN	rs75614366	13	106125045	T	C	-0.026	0.014169	0.066516	35365	0.10153
NCAN	rs7663772	4	88866151	A	G	0.0124	0.008436	0.141584	35349	0.46575
NCAN	rs77301115	19	44893716	A	G	0.0475	0.026649	0.074674	35368	0.0254
NCAN	rs77573848	5	97083043	A	G	0.0136	0.047901	0.776474	35345	0.00847
NCAN	rs78159704	3	16691245	T	C	-0.067	0.045687	0.142512	35370	0.00886
NCAN	rs78277979	18	49750572	A	C	0.0105	0.011605	0.3656	35365	0.16003
NCAN	rs7901624	10	19540750	A	G	-0.0094	0.010121	0.353013	35357	0.23102
NCAN	rs79192210	19	58049944	T	G	0.0002	0.032192	0.995043	35159	0.02916
NCAN	rs79429216	19	44942260	A	G	0.1165	0.052058	0.025229	35368	0.0064
NCAN	rs79694606	5	149811236	A	G	-0.016	0.019778	0.418533	35369	0.0476
NCAN	rs79711323	17	62717483	T	C	-0.0158	0.011895	0.184077	35368	0.15089
NCAN	rs79866533	14	51894636	C	T	-0.0043	0.040242	0.914906	35368	0.01065
NCAN	rs8191752	6	160026975	G	C	-0.0215	0.02726	0.43028	35390	0.02502
NCAN	rs881214	16	81532945	A	G	-0.0128	0.008494	0.131844	35375	0.45904
NCAN	rs927173	20	56439671	C	G	-0.0037	0.010077	0.713491	35385	0.23671
NCAN	rs9488860	6	116174554	T	G	-0.0149	0.008605	0.083348	35353	0.43212
NCAN	rs964184	11	116778201	C	G	-0.0103	0.012897	0.424498	35377	0.12321
TAGLN	rs10184054	chr2	20981005	G	C	0.0133	0.009583	0.165193	35373	0.24441
TAGLN	rs1065853	chr19	44909969	GGGGGGGTGGT	GGGGGGGGGGT	0.0126	0.017243	0.464941	35366	0.05944
TAGLN	rs11175664	chr12	65175176	A	G	-0.0089	0.043682	0.838553	35368	0.00876
TAGLN	rs111876364	chr2	184646503	T	C	0.0138	0.024772	0.577479	35360	0.02814
TAGLN	rs112155453	chr17	19867744	G	C	-0.0097	0.014606	0.506607	35365	0.08505
TAGLN	rs11233370	chr11	82911365	A	G	-0.0989	0.078597	0.208276	35343	0.00268
TAGLN	rs113323647	chr2	143155061	G	C	0.0099	0.035298	0.779115	35365	0.01326
TAGLN	rs11506727	chr9	8005793	G	C	0.0012	0.009054	0.894561	35375	0.25571
TAGLN	rs115095886	chr3	186070104	A	G	0.0076	0.016785	0.6507	35361	0.06225
TAGLN	rs11595324	chr10	100219661	C	T	-0.0039	0.026866	0.884579	35368	0.02376
TAGLN	rs11631516	chr15	93827914	A	G	-0.0201	0.008622	0.019746	35358	0.35425
TAGLN	rs116423554	chr4	76954746	T	C	-0.0178	0.016002	0.265986	35366	0.06988
TAGLN	rs1168124	chr1	62674059	T	C	0.0008	0.008551	0.925462	35358	0.33754
TAGLN	rs117300236	chr17	46675984	G	A	0.0017	0.010052	0.865701	35360	0.2346
TAGLN	rs117497956	chr7	103514066	G	C	0.0001	0.043576	0.998169	35369	0.01204
TAGLN	rs117725179	chr10	34478547	C	T	-0.0141	0.039645	0.722096	35344	0.01057
TAGLN	rs117868510	chr9	108392271	A	G	-0.0146	0.021064	0.488238	35363	0.03995
TAGLN	rs117943988	chr7	84692321	G	A	-0.0212	0.040202	0.597962	35349	0.00961
TAGLN	rs118083772	chr7	41383938	T	C	0.0307	0.072851	0.673459	35353	0.00307
TAGLN	rs12193976	chr6	94563482	A	G	4e-04	0.0659	0.995157	35343	0.00511
TAGLN	rs1260326	chr2	27508073	C	T	0.0315	0.008683	0.0002857	35373	0.34132
TAGLN	rs12652795	chr5	157001782	CCCCATT	ACCCATT	-0.0198	0.00836	0.017864	35351	0.40044
TAGLN	rs12662735	chr6	134487310	A	C	-0.0039	0.008528	0.647455	35373	0.34793
TAGLN	rs12740374	chr1	109274968	T	G	0.0023	0.009895	0.816187	35344	0.20782
TAGLN	rs12906502	chr15	78357067	T	G	-0.0076	0.009449	0.421222	35361	0.25556
TAGLN	rs12910436	chr15	88365906	G	A	0.0159	0.011956	0.183553	35350	0.13455
TAGLN	rs12944238	chr17	31436355	A	G	-0.0223	0.01353	0.099306	35361	0.10089
TAGLN	rs13226650	chr7	73602675	G	A	0.0332	0.010267	0.001222	35354	0.196
TAGLN	rs13398112	chr2	67601480	CGC	CGT	0.0022	0.010101	0.827581	35359	0.19949
TAGLN	rs138911101	chr15	83432452	G	T	0.0494	0.072758	0.49716	35366	0.00329
TAGLN	rs140613504	chr1	193500925	T	C	-0.0387	0.034979	0.268568	35345	0.01351
TAGLN	rs1408566	chr13	107229537	T	C	-0.016	0.01121	0.153499	35363	0.15856
TAGLN	rs141469619	chr11	116843577	G	A	0.0245	0.036529	0.502413	35377	0.01201
TAGLN	rs142665780	chr20	18983541	GCACCCTGCCTGCCTCTTGCTGCCT	CCACCCTGCCTGCCTCTTGCTGCCT	0.0432	0.042478	0.309152	35373	0.00914
TAGLN	rs142921362	chr6	63139010	G	A	-0.0261	0.016964	0.123919	35350	0.06348
TAGLN	rs143739812	chr4	153356357	T	C	9e-04	0.026605	0.973014	35375	0.02642
TAGLN	rs144019272	chr16	10967811	A	G	0.0085	0.032697	0.79489	35383	0.01549
TAGLN	rs144175075	chr22	36485370	T	C	0.0729	0.053345	0.171762	35383	0.00534
TAGLN	rs144310047	chr15	44344211	T	G	-0.0192	0.022087	0.384682	35363	0.03539
TAGLN	rs147243898	chr11	112081459	TCCATCTCTA	CCCATCTCTA	0.0329	0.022653	0.146413	35364	0.03394
TAGLN	rs147440796	chr7	73409437	C	T	-0.0325	0.026062	0.212396	35354	0.02484
TAGLN	rs150371564	chr10	29361278	T	A	0.0077	0.055481	0.889619	35363	0.00567
TAGLN	rs150791	chr21	42040934	A	G	-0.0326	0.012041	0.006782	35367	0.13178
TAGLN	rs1525599	chr2	141021133	A	G	0.0028	0.012413	0.821538	35354	0.12955
TAGLN	rs1569446	chr6	16114017	G	A	0.0026	0.008102	0.748273	35381	0.48886
TAGLN	rs17363522	chr5	116674146	A	G	-0.0044	0.031243	0.888004	35361	0.01735
TAGLN	rs17410962	chr8	19990569	A	G	-0.0034	0.013594	0.802496	35368	0.09642
TAGLN	rs189879235	chr8	35126897	C	T	-0.012	0.019538	0.539084	35370	0.0457
TAGLN	rs189954364	chr11	97045967	T	C	-0.0126	0.031185	0.686182	35359	0.01778
TAGLN	rs1961	chr5	59149566	G	A	0.0056	0.008386	0.50425	35360	0.4023
TAGLN	rs199717562	chr1	55026178	G	A	0.0108	0.009595	0.260342	35362	0.23664
TAGLN	rs219235	chr7	151258679	A	G	0.0056	0.010275	0.585746	35373	0.19594
TAGLN	rs2509971	chr11	62415966	G	A	0.0173	0.012113	0.153229	35363	0.13408
TAGLN	rs2738447	chr19	11116804	C	A	0.0082	0.008296	0.322953	35381	0.43059
TAGLN	rs2738588	chr16	78646858	A	G	0.0103	0.008283	0.213699	35367	0.44593
TAGLN	rs2749036	chr6	52769339	A	T	-0.0021	0.008607	0.80723	35366	0.36222
TAGLN	rs2829779	chr21	25495706	A	G	-0.0107	0.009511	0.26058	35367	0.24461
TAGLN	rs28544889	chr7	130775532	A	C	0.0015	0.009266	0.871401	35352	0.27493
TAGLN	rs28601761	chr8	125487789	G	C	0.0178	0.008308	0.03216	35369	0.42975
TAGLN	rs311449	chr1	25064907	A	C	0.0042	0.008827	0.634226	35372	0.32539
TAGLN	rs34333692	chr3	55317169	T	C	-0.0226	0.01865	0.2256	35349	0.05066
TAGLN	rs35193120	chr8	139122013	A	C	0.0082	0.012384	0.507864	35375	0.12209
TAGLN	rs355845	chr2	164767839	A	T	0.0218	0.008601	0.011259	35353	0.34763
TAGLN	rs4234798	chr4	7218206	GAGATCCTGC	TAGATCCTGC	0.0084	0.008271	0.309814	35380	0.4389
TAGLN	rs4245791	chr2	43847292	T	C	0.0025	0.009244	0.786828	35362	0.27966
TAGLN	rs4395776	chr6	6381296	T	C	-0.0103	0.014	0.461919	35378	0.09677
TAGLN	rs4489092	chr5	91124827	T	G	-0.0021	0.008671	0.808634	35340	0.33826
TAGLN	rs45549538	chr18	11982211	T	C	-0.023	0.016843	0.172082	35368	0.06213
TAGLN	rs4598523	chr1	97945060	T	C	-0.0093	0.009597	0.33254	35361	0.24879
TAGLN	rs4646257	chr8	18405036	C	T	0.0033	0.011344	0.771126	35377	0.15929
TAGLN	rs4809641	chr20	37447464	A	C	-0.0113	0.010449	0.279485	35368	0.19022
TAGLN	rs556107	chr1	234717312	T	C	-0.0008	0.00853	0.925278	35355	0.4462
TAGLN	rs573922	chr15	58447895	T	C	-0.0078	0.012154	0.521032	35366	0.13219
TAGLN	rs57792106	chr12	127929686	A	C	0.007	0.026037	0.788049	35382	0.02539
TAGLN	rs58542926	chr19	19268740	TGGAGCTGTATTTGCCTTCCATGGTGCA	CGGAGCTGTATTTGCCTTCCATGGTGCA	0.0072	0.015415	0.640434	35353	0.07691
TAGLN	rs58593776	chr2	240406167	C	G	-0.0409	0.04629	0.376929	35273	0.00838
TAGLN	rs58830878	chr1	5635962	C	G	-0.0197	0.008208	0.016386	35384	0.47641
TAGLN	rs59347135	chr8	19892533	G	C	0.0004	0.018735	0.982966	35368	0.04299
TAGLN	rs59882870	chr7	76009103	A	G	-0.0004	0.010009	0.968122	35350	0.16061
TAGLN	rs6037751	chr20	4083180	A	G	0.0121	0.009582	0.206659	35371	0.29267
TAGLN	rs6090040	chr20	64060707	C	A	-0.0023	0.008337	0.782632	34870	0.48437
TAGLN	rs6102034	chr20	40557950	G	C	0.008	0.009282	0.388765	35373	0.26624
TAGLN	rs62158853	chr2	113111989	T	C	-0.0072	0.008193	0.379517	35356	0.44924
TAGLN	rs622871	chr6	31910718	G	A	-0.0107	0.008658	0.216517	35441	0.32877
TAGLN	rs6453511	chr5	80272237	G	C	0.0094	0.008236	0.253715	35341	0.43224
TAGLN	rs6490794	chr13	23427805	C	G	-0.0081	0.008863	0.360783	35382	0.31043
TAGLN	rs6499228	chr16	69504371	G	A	-0.0249	0.016423	0.129487	35370	0.06841
TAGLN	rs650865	chr1	244279068	A	G	-0.0137	0.019501	0.482349	35346	0.04417
TAGLN	rs6602885	chr10	46235002	A	G	0.0337	0.016392	0.03979	35326	0.06945
TAGLN	rs660745	chr19	48716202	C	T	0.0034	0.008489	0.688766	35378	0.3758
TAGLN	rs67215541	chr7	51549770	C	A	3e-04	0.01133	0.978875	35341	0.2144
TAGLN	rs6813330	chr4	105564588	C	T	-0.0086	0.008344	0.302674	35348	0.42359
TAGLN	rs7028168	chr9	106022256	G	A	-0.0172	0.014926	0.249174	35365	0.08139
TAGLN	rs71541363	chr7	137650524	T	G	0.0264	0.028491	0.354134	35375	0.02185
TAGLN	rs72761286	chr15	100659334	G	C	-0.0205	0.018495	0.267689	35325	0.05268
TAGLN	rs72882439	chr6	61929243	C	T	-0.0021	0.038412	0.956401	35349	0.01183
TAGLN	rs72907256	chr2	190930252	T	C	0.003	0.030132	0.920691	35372	0.01953
TAGLN	rs72988687	chr3	903530	G	A	-0.0399	0.035988	0.267564	35231	0.01292
TAGLN	rs73015021	chr19	11082239	G	A	-0.0119	0.014402	0.408662	35379	0.08924
TAGLN	rs738408	chr22	43928850	T	C	0.0047	0.009766	0.630338	35372	0.22998
TAGLN	rs74558764	chr15	57534813	ACACT	GCACT	0.0073	0.05325	0.890961	35360	0.00626
TAGLN	rs74617384	chr6	160576086	T	A	-0.0099	0.017243	0.565879	35388	0.06155
TAGLN	rs74671360	chr11	15156053	G	A	0.06	0.027747	0.030587	35368	0.02031
TAGLN	rs7558873	chr2	12486454	A	G	0.0028	0.014964	0.851568	35371	0.08401
TAGLN	rs75614366	chr13	106125045	T	C	-0.0109	0.01374	0.427607	35365	0.10153
TAGLN	rs7663772	chr4	88866151	A	G	0.0058	0.008214	0.480121	35349	0.46575
TAGLN	rs77301115	chr19	44893716	A	G	0.0074	0.025694	0.773342	35368	0.0254
TAGLN	rs77573848	chr5	97083043	A	G	0.0496	0.046003	0.280951	35345	0.00847
TAGLN	rs78159704	chr3	16691245	T	C	-0.0181	0.043811	0.679506	35370	0.00886
TAGLN	rs78277979	chr18	49750572	A	C	-0.0139	0.011214	0.215167	35365	0.16003
TAGLN	rs7901624	chr10	19540750	A	G	-0.0006	0.01059	0.954819	35357	0.23102
TAGLN	rs79192210	chr19	58049944	T	G	0.0215	0.024125	0.372821	35159	0.02916
TAGLN	rs79429216	chr19	44942260	A	G	0.0992	0.050118	0.047778	35368	0.0064
TAGLN	rs79694606	chr5	149811236	A	G	0.0521	0.019091	0.006353	35369	0.0476
TAGLN	rs79711323	chr17	62717483	T	C	0.012	0.011486	0.296159	35368	0.15089
TAGLN	rs79866533	chr14	51894636	C	T	0.0022	0.03912	0.955153	35368	0.01065
TAGLN	rs8191752	chr6	160026975	G	C	-0.0841	0.026181	0.001317	35390	0.02502
TAGLN	rs881214	chr16	81532945	A	G	0.0206	0.00821	0.012106	35375	0.45904
TAGLN	rs927173	chr20	56439671	C	G	0.0069	0.009713	0.477466	35385	0.23671
TAGLN	rs9488860	chr6	116174554	T	G	-0.0031	0.008409	0.712396	35353	0.43212
TAGLN	rs964184	chr11	116778201	C	G	-0.0251	0.012379	0.042594	35377	0.12321
TIMD4	rs10184054	2	20981005	G	C	0.0012	0.009861	0.903143	35373	0.24441
TIMD4	rs1065853	19	44909969	GGGGGGGTGGT	GGGGGGGGGGT	0.0367	0.017763	0.038822	35366	0.05944
TIMD4	rs11175664	12	65175176	A	G	0.0963	0.044918	0.03204	35368	0.00876
TIMD4	rs111876364	2	184646503	T	C	0.0044	0.025539	0.863214	35360	0.02814
TIMD4	rs112155453	17	19867744	G	C	0.0224	0.014997	0.135281	35365	0.08505
TIMD4	rs11233370	11	82911365	A	G	-0.0209	0.081308	0.797142	35343	0.00268
TIMD4	rs113323647	2	143155061	G	C	-0.0948	0.036378	0.009162	35365	0.01326
TIMD4	rs11506727	9	8005793	G	C	0.0092	0.009653	0.340548	35375	0.25571
TIMD4	rs115095886	3	186070104	A	G	-0.0614	0.017231	0.0003661	35361	0.06225
TIMD4	rs11595324	10	100219661	C	T	-0.0121	0.027233	0.656815	35368	0.02376
TIMD4	rs11631516	15	93827914	A	G	-0.0015	0.008593	0.861421	35358	0.35425
TIMD4	rs116423554	4	76954746	T	C	-0.0122	0.016499	0.459646	35366	0.06988
TIMD4	rs1168124	1	62674059	T	C	-0.0037	0.008862	0.676297	35358	0.33754
TIMD4	rs117300236	17	46675984	G	A	0.0048	0.010496	0.64745	35360	0.2346
TIMD4	rs117497956	7	103514066	G	C	0.0047	0.038817	0.903626	35369	0.01204
TIMD4	rs117725179	10	34478547	C	T	0.0669	0.040499	0.098557	35344	0.01057
TIMD4	rs117868510	9	108392271	A	G	0.0178	0.021553	0.408867	35363	0.03995
TIMD4	rs117943988	7	84692321	G	A	0.0107	0.041198	0.79508	35349	0.00961
TIMD4	rs118083772	7	41383938	T	C	-0.0446	0.074845	0.551242	35353	0.00307
TIMD4	rs12193976	6	94563482	A	G	-0.0713	0.060532	0.238837	35343	0.00511
TIMD4	rs1260326	2	27508073	C	T	0.0519	0.008898	5.441e-09	35373	0.34132
TIMD4	rs12652795	5	157001782	CCCCATT	ACCCATT	-0.1786	0.008589	4.908e-96	35351	0.40044
TIMD4	rs12662735	6	134487310	A	C	0.0019	0.008993	0.832665	35373	0.34793
TIMD4	rs12740374	1	109274968	T	G	0.005	0.010398	0.63061	35344	0.20782
TIMD4	rs12906502	15	78357067	T	G	-0.0037	0.009504	0.697051	35361	0.25556
TIMD4	rs12910436	15	88365906	G	A	-0.0184	0.012242	0.132843	35350	0.13455
TIMD4	rs12944238	17	31436355	A	G	-0.0115	0.013958	0.410003	35361	0.10089
TIMD4	rs13226650	7	73602675	G	A	0.028	0.010545	0.007922	35354	0.196
TIMD4	rs13398112	2	67601480	CGC	CGT	-0.0111	0.010621	0.295991	35359	0.19949
TIMD4	rs138911101	15	83432452	G	T	0.0395	0.0745	0.595973	35366	0.00329
TIMD4	rs140613504	1	193500925	T	C	-0.0265	0.03598	0.46142	35345	0.01351
TIMD4	rs1408566	13	107229537	T	C	-0.0139	0.011487	0.226263	35363	0.15856
TIMD4	rs141469619	11	116843577	G	A	-0.0118	0.037818	0.755027	35377	0.01201
TIMD4	rs142665780	20	18983541	GCACCCTGCCTGCCTCTTGCTGCCT	CCACCCTGCCTGCCTCTTGCTGCCT	-0.0431	0.043512	0.321916	35373	0.00914
TIMD4	rs142921362	6	63139010	G	A	0.0096	0.017403	0.5812	35350	0.06348
TIMD4	rs143739812	4	153356357	T	C	-0.0056	0.026293	0.831336	35375	0.02642
TIMD4	rs144019272	16	10967811	A	G	-0.0287	0.033621	0.393303	35383	0.01549
TIMD4	rs144175075	22	36485370	T	C	0.0668	0.054617	0.221308	35383	0.00534
TIMD4	rs144310047	15	44344211	T	G	-0.0586	0.022611	0.009553	35363	0.03539
TIMD4	rs147243898	11	112081459	TCCATCTCTA	CCCATCTCTA	-0.023	0.023432	0.326305	35364	0.03394
TIMD4	rs147440796	7	73409437	C	T	-0.0122	0.0268	0.648953	35354	0.02484
TIMD4	rs150371564	10	29361278	T	A	0.0236	0.056842	0.678006	35363	0.00567
TIMD4	rs150791	21	42040934	A	G	-0.0129	0.012369	0.296977	35367	0.13178
TIMD4	rs1525599	2	141021133	A	G	-0.0003	0.012736	0.981208	35354	0.12955
TIMD4	rs1569446	6	16114017	G	A	0.0006	0.007856	0.93912	35381	0.48886
TIMD4	rs17363522	5	116674146	A	G	-0.0129	0.032427	0.690765	35361	0.01735
TIMD4	rs17410962	8	19990569	A	G	0.0197	0.014127	0.163162	35368	0.09642
TIMD4	rs189879235	8	35126897	C	T	0.0072	0.019969	0.718427	35370	0.0457
TIMD4	rs189954364	11	97045967	T	C	0.0299	0.032093	0.351507	35359	0.01778
TIMD4	rs1961	5	59149566	G	A	-0.012	0.008611	0.163469	35360	0.4023
TIMD4	rs199717562	1	55026178	G	A	0.0107	0.009902	0.279899	35362	0.23664
TIMD4	rs219235	7	151258679	A	G	0.0145	0.010587	0.170801	35373	0.19594
TIMD4	rs2509971	11	62415966	G	A	-0.0112	0.012521	0.371067	35363	0.13408
TIMD4	rs2738447	19	11116804	C	A	-0.0138	0.008505	0.104699	35381	0.43059
TIMD4	rs2738588	16	78646858	A	G	0.0011	0.008765	0.900134	35367	0.44593
TIMD4	rs2749036	6	52769339	A	T	-0.0049	0.008705	0.573526	35366	0.36222
TIMD4	rs2829779	21	25495706	A	G	0.0092	0.00982	0.348836	35367	0.24461
TIMD4	rs28544889	7	130775532	A	C	-0.0034	0.009537	0.721461	35352	0.27493
TIMD4	rs28601761	8	125487789	G	C	0.0202	0.008502	0.017503	35369	0.42975
TIMD4	rs311449	1	25064907	A	C	-0.0002	0.008832	0.981933	35372	0.32539
TIMD4	rs34333692	3	55317169	T	C	-0.0236	0.019082	0.216179	35349	0.05066
TIMD4	rs35193120	8	139122013	A	C	-0.0033	0.012838	0.797148	35375	0.12209
TIMD4	rs355845	2	164767839	A	T	-0.0008	0.008786	0.927447	35353	0.34763
TIMD4	rs4234798	4	7218206	GAGATCCTGC	TAGATCCTGC	0.0009	0.008404	0.914715	35380	0.4389
TIMD4	rs4245791	2	43847292	T	C	0.0026	0.009532	0.785025	35362	0.27966
TIMD4	rs4395776	6	6381296	T	C	-0.006	0.014504	0.679106	35378	0.09677
TIMD4	rs4489092	5	91124827	T	G	-0.0073	0.00904	0.41939	35340	0.33826
TIMD4	rs45549538	18	11982211	T	C	-0.0341	0.017275	0.048393	35368	0.06213
TIMD4	rs4598523	1	97945060	T	C	-0.0174	0.009811	0.076133	35361	0.24879
TIMD4	rs4646257	8	18405036	C	T	0.0248	0.011582	0.032261	35377	0.15929
TIMD4	rs4809641	20	37447464	A	C	0.0002	0.008988	0.982247	35368	0.19022
TIMD4	rs556107	1	234717312	T	C	0.0199	0.00847	0.018807	35355	0.4462
TIMD4	rs573922	15	58447895	T	C	-0.0235	0.012409	0.058245	35366	0.13219
TIMD4	rs57792106	12	127929686	A	C	-0.0219	0.026785	0.413572	35382	0.02539
TIMD4	rs58542926	19	19268740	TGGAGCTGTATTTGCCTTCCATGGTGCA	CGGAGCTGTATTTGCCTTCCATGGTGCA	0.0035	0.015923	0.82602	35353	0.07691
TIMD4	rs58593776	2	240406167	C	G	0.0269	0.047448	0.570757	35273	0.00838
TIMD4	rs58830878	1	5635962	C	G	-0.0069	0.008504	0.417131	35384	0.47641
TIMD4	rs59347135	8	19892533	G	C	0.0099	0.020655	0.631728	35368	0.04299
TIMD4	rs59882870	7	76009103	A	G	-0.0183	0.011403	0.108536	35350	0.16061
TIMD4	rs6037751	20	4083180	A	G	0	0.007176	0.998814	35371	0.29267
TIMD4	rs6090040	20	64060707	C	A	-0.0114	0.008388	0.174117	34870	0.48437
TIMD4	rs6102034	20	40557950	G	C	0.0138	0.009506	0.146585	35373	0.26624
TIMD4	rs62158853	2	113111989	T	C	0.0127	0.008439	0.132336	35356	0.44924
TIMD4	rs622871	6	31910718	G	A	-0.0727	0.008915	3.497e-16	35441	0.32877
TIMD4	rs6453511	5	80272237	G	C	0.006	0.008527	0.481644	35341	0.43224
TIMD4	rs6490794	13	23427805	C	G	-0.0033	0.008963	0.71275	35382	0.31043
TIMD4	rs6499228	16	69504371	G	A	-0.011	0.016821	0.51314	35370	0.06841
TIMD4	rs650865	1	244279068	A	G	-0.0062	0.020045	0.75709	35346	0.04417
TIMD4	rs6602885	10	46235002	A	G	-0.0101	0.016799	0.547698	35326	0.06945
TIMD4	rs660745	19	48716202	C	T	0.0477	0.008696	4.125e-08	35378	0.3758
TIMD4	rs67215541	7	51549770	C	A	-0.0155	0.010191	0.12829	35341	0.2144
TIMD4	rs6813330	4	105564588	C	T	-0.0003	0.008679	0.972427	35348	0.42359
TIMD4	rs7028168	9	106022256	G	A	0.0293	0.015269	0.054998	35365	0.08139
TIMD4	rs71541363	7	137650524	T	G	-0.0304	0.029224	0.298236	35375	0.02185
TIMD4	rs72761286	15	100659334	G	C	0.0113	0.018986	0.551721	35325	0.05268
TIMD4	rs72882439	6	61929243	C	T	-0.0825	0.039166	0.035167	35349	0.01183
TIMD4	rs72907256	2	190930252	T	C	0.0296	0.030861	0.337486	35372	0.01953
TIMD4	rs72988687	3	903530	G	A	-0.0177	0.036907	0.631524	35231	0.01292
TIMD4	rs73015021	19	11082239	G	A	0.0141	0.014677	0.336711	35379	0.08924
TIMD4	rs738408	22	43928850	T	C	-0.0003	0.008993	0.973387	35372	0.22998
TIMD4	rs74558764	15	57534813	ACACT	GCACT	0.0129	0.054526	0.81298	35360	0.00626
TIMD4	rs74617384	6	160576086	T	A	-0.0078	0.017566	0.657019	35388	0.06155
TIMD4	rs74671360	11	15156053	G	A	0.0511	0.028647	0.074463	35368	0.02031
TIMD4	rs7558873	2	12486454	A	G	-0.0072	0.015177	0.635214	35371	0.08401
TIMD4	rs75614366	13	106125045	T	C	-0.001	0.013494	0.940925	35365	0.10153
TIMD4	rs7663772	4	88866151	A	G	0.0091	0.008384	0.277735	35349	0.46575
TIMD4	rs77301115	19	44893716	A	G	0.0092	0.026179	0.725273	35368	0.0254
TIMD4	rs77573848	5	97083043	A	G	0.0059	0.047739	0.901641	35345	0.00847
TIMD4	rs78159704	3	16691245	T	C	0.0866	0.045067	0.05466	35370	0.00886
TIMD4	rs78277979	18	49750572	A	C	0.0052	0.011432	0.649211	35365	0.16003
TIMD4	rs7901624	10	19540750	A	G	0.0057	0.010051	0.57066	35357	0.23102
TIMD4	rs79192210	19	58049944	T	G	-0.0166	0.024764	0.502651	35159	0.02916
TIMD4	rs79429216	19	44942260	A	G	0.0604	0.051414	0.240086	35368	0.0064
TIMD4	rs79694606	5	149811236	A	G	0.0323	0.019801	0.102838	35369	0.0476
TIMD4	rs79711323	17	62717483	T	C	0.0152	0.01179	0.197328	35368	0.15089
TIMD4	rs79866533	14	51894636	C	T	0.0079	0.03982	0.842737	35368	0.01065
TIMD4	rs8191752	6	160026975	G	C	0.0192	0.026923	0.475761	35390	0.02502
TIMD4	rs881214	16	81532945	A	G	-0.0005	0.00775	0.94856	35375	0.45904
TIMD4	rs927173	20	56439671	C	G	0.0129	0.009921	0.193486	35385	0.23671
TIMD4	rs9488860	6	116174554	T	G	0.0063	0.008479	0.457468	35353	0.43212
TIMD4	rs964184	11	116778201	C	G	0.0288	0.0128	0.024447	35377	0.12321
APOB	rs10184054	2	20981005	G	C	-0.0064	0.009733	0.510836	35373	0.24441
APOB	rs1065853	19	44909969	GGGGGGGTGGT	GGGGGGGGGGT	-0.5333	0.017562	1.493e-202	35366	0.05944
APOB	rs11175664	12	65175176	A	G	-0.0233	0.044797	0.602976	35368	0.00876
APOB	rs111876364	2	184646503	T	C	0.0025	0.025364	0.921484	35360	0.02814
APOB	rs112155453	17	19867744	G	C	0.0079	0.015032	0.59921	35365	0.08505
APOB	rs11233370	11	82911365	A	G	0.0303	0.080353	0.706109	35343	0.00268
APOB	rs113323647	2	143155061	G	C	-0.005	0.036569	0.891247	35365	0.01326
APOB	rs11506727	9	8005793	G	C	0.0003	0.010763	0.977763	35375	0.25571
APOB	rs115095886	3	186070104	A	G	-0.0202	0.01726	0.241854	35361	0.06225
APOB	rs11595324	10	100219661	C	T	0.0717	0.027161	0.008295	35368	0.02376
APOB	rs11631516	15	93827914	A	G	-0.0168	0.008806	0.056422	35358	0.35425
APOB	rs116423554	4	76954746	T	C	0.0366	0.016375	0.02541	35366	0.06988
APOB	rs1168124	1	62674059	T	C	0.021	0.008847	0.017612	35358	0.33754
APOB	rs117300236	17	46675984	G	A	0.0024	0.010142	0.81293	35360	0.2346
APOB	rs117497956	7	103514066	G	C	-0.0344	0.038562	0.372352	35369	0.01204
APOB	rs117725179	10	34478547	C	T	0.0365	0.040437	0.366722	35344	0.01057
APOB	rs117868510	9	108392271	A	G	-0.0165	0.021571	0.444319	35363	0.03995
APOB	rs117943988	7	84692321	G	A	-0.1301	0.041128	0.00156	35349	0.00961
APOB	rs118083772	7	41383938	T	C	0.0197	0.074718	0.792043	35353	0.00307
APOB	rs12193976	6	94563482	A	G	0.0736	0.060243	0.221815	35343	0.00511
APOB	rs1260326	2	27508073	C	T	-0.0248	0.0089	0.005326	35373	0.34132
APOB	rs12652795	5	157001782	CCCCATT	ACCCATT	0.0178	0.008557	0.037516	35351	0.40044
APOB	rs12662735	6	134487310	A	C	0.0149	0.008804	0.090562	35373	0.34793
APOB	rs12740374	1	109274968	T	G	-0.134	0.010322	1.552e-38	35344	0.20782
APOB	rs12906502	15	78357067	T	G	0.0026	0.009524	0.784863	35361	0.25556
APOB	rs12910436	15	88365906	G	A	-0.0007	0.012988	0.957018	35350	0.13455
APOB	rs12944238	17	31436355	A	G	-0.0067	0.013949	0.630997	35361	0.10089
APOB	rs13226650	7	73602675	G	A	-0.0074	0.01051	0.481365	35354	0.196
APOB	rs13398112	2	67601480	CGC	CGT	-0.0117	0.010515	0.26584	35359	0.19949
APOB	rs138911101	15	83432452	G	T	0.0179	0.074238	0.809464	35366	0.00329
APOB	rs140613504	1	193500925	T	C	0.0183	0.035819	0.609421	35345	0.01351
APOB	rs1408566	13	107229537	T	C	-0.005	0.011578	0.665859	35363	0.15856
APOB	rs141469619	11	116843577	G	A	0.07	0.037329	0.060766	35377	0.01201
APOB	rs142665780	20	18983541	GCACCCTGCCTGCCTCTTGCTGCCT	CCACCCTGCCTGCCTCTTGCTGCCT	-0.0176	0.043346	0.684719	35373	0.00914
APOB	rs142921362	6	63139010	G	A	0.0193	0.017291	0.264333	35350	0.06348
APOB	rs143739812	4	153356357	T	C	0.0259	0.026357	0.325775	35375	0.02642
APOB	rs144019272	16	10967811	A	G	0.0048	0.033731	0.886841	35383	0.01549
APOB	rs144175075	22	36485370	T	C	-0.0912	0.054512	0.094324	35383	0.00534
APOB	rs144310047	15	44344211	T	G	-0.0234	0.022591	0.30029	35363	0.03539
APOB	rs147243898	11	112081459	TCCATCTCTA	CCCATCTCTA	-0.0254	0.023183	0.273232	35364	0.03394
APOB	rs147440796	7	73409437	C	T	0.0389	0.026674	0.144749	35354	0.02484
APOB	rs150371564	10	29361278	T	A	0.0874	0.056649	0.12287	35363	0.00567
APOB	rs150791	21	42040934	A	G	0.0212	0.012337	0.085718	35367	0.13178
APOB	rs1525599	2	141021133	A	G	-0.0111	0.012612	0.378782	35354	0.12955
APOB	rs1569446	6	16114017	G	A	-0.0292	0.00839	0.0005008	35381	0.48886
APOB	rs17363522	5	116674146	A	G	-0.0098	0.032129	0.760351	35361	0.01735
APOB	rs17410962	8	19990569	A	G	-0.0576	0.014082	4.306e-05	35368	0.09642
APOB	rs189879235	8	35126897	C	T	0.003	0.019888	0.880098	35370	0.0457
APOB	rs189954364	11	97045967	T	C	-0.0284	0.031775	0.371439	35359	0.01778
APOB	rs1961	5	59149566	G	A	-0.0048	0.008632	0.578153	35360	0.4023
APOB	rs199717562	1	55026178	G	A	-0.0153	0.009815	0.119026	35362	0.23664
APOB	rs219235	7	151258679	A	G	-0.002	0.010463	0.848412	35373	0.19594
APOB	rs2509971	11	62415966	G	A	0.0174	0.012382	0.159945	35363	0.13408
APOB	rs2738447	19	11116804	C	A	0.0438	0.008508	2.628e-07	35381	0.43059
APOB	rs2738588	16	78646858	A	G	-0.0106	0.008442	0.209267	35367	0.44593
APOB	rs2749036	6	52769339	A	T	0.0072	0.008743	0.410227	35366	0.36222
APOB	rs2829779	21	25495706	A	G	-0.0121	0.009797	0.216813	35367	0.24461
APOB	rs28544889	7	130775532	A	C	0.0162	0.009422	0.08553	35352	0.27493
APOB	rs28601761	8	125487789	G	C	-0.0288	0.008504	0.0007079	35369	0.42975
APOB	rs311449	1	25064907	A	C	-0.0015	0.009221	0.870777	35372	0.32539
APOB	rs34333692	3	55317169	T	C	0.0117	0.01912	0.540579	35349	0.05066
APOB	rs35193120	8	139122013	A	C	0.002	0.012594	0.873819	35375	0.12209
APOB	rs355845	2	164767839	A	T	-0.0162	0.008815	0.066085	35353	0.34763
APOB	rs4234798	4	7218206	GAGATCCTGC	TAGATCCTGC	-0.0009	0.008667	0.917291	35380	0.4389
APOB	rs4245791	2	43847292	T	C	-0.0412	0.009349	1.048e-05	35362	0.27966
APOB	rs4395776	6	6381296	T	C	0.0226	0.014342	0.115071	35378	0.09677
APOB	rs4489092	5	91124827	T	G	0.0144	0.008905	0.105866	35340	0.33826
APOB	rs45549538	18	11982211	T	C	-0.0274	0.017226	0.111702	35368	0.06213
APOB	rs4598523	1	97945060	T	C	-0.0094	0.00983	0.338929	35361	0.24879
APOB	rs4646257	8	18405036	C	T	-0.0377	0.01153	0.001077	35377	0.15929
APOB	rs4809641	20	37447464	A	C	-0.0104	0.010674	0.329872	35368	0.19022
APOB	rs556107	1	234717312	T	C	0.0179	0.008432	0.033758	35355	0.4462
APOB	rs573922	15	58447895	T	C	0.0274	0.012393	0.027045	35366	0.13219
APOB	rs57792106	12	127929686	A	C	0.0207	0.026662	0.437522	35382	0.02539
APOB	rs58542926	19	19268740	TGGAGCTGTATTTGCCTTCCATGGTGCA	CGGAGCTGTATTTGCCTTCCATGGTGCA	-0.0128	0.015913	0.421172	35353	0.07691
APOB	rs58593776	2	240406167	C	G	-0.028	0.047392	0.554644	35273	0.00838
APOB	rs58830878	1	5635962	C	G	-0.0094	0.00844	0.265413	35384	0.47641
APOB	rs59347135	8	19892533	G	C	0.0346	0.020644	0.093732	35368	0.04299
APOB	rs59882870	7	76009103	A	G	0.0273	0.011373	0.016378	35350	0.16061
APOB	rs6037751	20	4083180	A	G	-0.0005	0.010631	0.962488	35371	0.29267
APOB	rs6090040	20	64060707	C	A	-0.0075	0.00839	0.371377	34870	0.48437
APOB	rs6102034	20	40557950	G	C	-0.0095	0.009453	0.31493	35373	0.26624
APOB	rs62158853	2	113111989	T	C	0.0017	0.008266	0.837059	35356	0.44924
APOB	rs622871	6	31910718	G	A	-0.0068	0.008823	0.440855	35441	0.32877
APOB	rs6453511	5	80272237	G	C	0.0121	0.008498	0.15449	35341	0.43224
APOB	rs6490794	13	23427805	C	G	0.0106	0.009081	0.243116	35382	0.31043
APOB	rs6499228	16	69504371	G	A	-0.0156	0.016804	0.353228	35370	0.06841
APOB	rs650865	1	244279068	A	G	0.0163	0.019876	0.412168	35346	0.04417
APOB	rs6602885	10	46235002	A	G	0.0096	0.016746	0.566469	35326	0.06945
APOB	rs660745	19	48716202	C	T	0.0189	0.00873	0.030383	35378	0.3758
APOB	rs67215541	7	51549770	C	A	0.0083	0.010113	0.411811	35341	0.2144
APOB	rs6813330	4	105564588	C	T	-0.0088	0.008466	0.298575	35348	0.42359
APOB	rs7028168	9	106022256	G	A	0.013	0.015215	0.392871	35365	0.08139
APOB	rs71541363	7	137650524	T	G	-0.0001	0.043624	0.998171	35375	0.02185
APOB	rs72761286	15	100659334	G	C	-0.005	0.019114	0.793637	35325	0.05268
APOB	rs72882439	6	61929243	C	T	0.0884	0.038968	0.023296	35349	0.01183
APOB	rs72907256	2	190930252	T	C	0.0425	0.030703	0.166284	35372	0.01953
APOB	rs72988687	3	903530	G	A	-0.0188	0.036929	0.610695	35231	0.01292
APOB	rs73015021	19	11082239	G	A	-0.1316	0.014734	4.197e-19	35379	0.08924
APOB	rs738408	22	43928850	T	C	0.0056	0.00996	0.573936	35372	0.22998
APOB	rs74558764	15	57534813	ACACT	GCACT	0.0038	0.054181	0.944086	35360	0.00626
APOB	rs74617384	6	160576086	T	A	0.0083	0.017611	0.637431	35388	0.06155
APOB	rs74671360	11	15156053	G	A	0.01	0.028511	0.725784	35368	0.02031
APOB	rs7558873	2	12486454	A	G	-0.0283	0.015042	0.059919	35371	0.08401
APOB	rs75614366	13	106125045	T	C	0.0158	0.01399	0.258727	35365	0.10153
APOB	rs7663772	4	88866151	A	G	-0.0031	0.008263	0.707535	35349	0.46575
APOB	rs77301115	19	44893716	A	G	0.1369	0.026323	1.985e-07	35368	0.0254
APOB	rs77573848	5	97083043	A	G	-0.0037	0.047064	0.937338	35345	0.00847
APOB	rs78159704	3	16691245	T	C	-0.0376	0.045059	0.404022	35370	0.00886
APOB	rs78277979	18	49750572	A	C	-0.004	0.011522	0.728462	35365	0.16003
APOB	rs7901624	10	19540750	A	G	-0.0165	0.010003	0.099041	35357	0.23102
APOB	rs79192210	19	58049944	T	G	0.041	0.024752	0.097638	35159	0.02916
APOB	rs79429216	19	44942260	A	G	0.0253	0.051424	0.622729	35368	0.0064
APOB	rs79694606	5	149811236	A	G	-0.0302	0.019575	0.122879	35369	0.0476
APOB	rs79711323	17	62717483	T	C	0.0084	0.011797	0.476443	35368	0.15089
APOB	rs79866533	14	51894636	C	T	0.0495	0.039917	0.214951	35368	0.01065
APOB	rs8191752	6	160026975	G	C	0.0197	0.02683	0.462789	35390	0.02502
APOB	rs881214	16	81532945	A	G	-0.0151	0.008378	0.071501	35375	0.45904
APOB	rs927173	20	56439671	C	G	0.0091	0.009841	0.355123	35385	0.23671
APOB	rs9488860	6	116174554	T	G	-0.0044	0.008508	0.605043	35353	0.43212
APOB	rs964184	11	116778201	C	G	-0.0806	0.012658	1.92e-10	35377	0.12321
PCSK9	rs10184054	2	20981005	G	C	0.0492	0.009572	2.75e-07	35373	0.24441
PCSK9	rs1065853	19	44909969	GGGGGGGTGGT	GGGGGGGGGGT	-0.0342	0.017358	0.048808	35366	0.05944
PCSK9	rs11175664	12	65175176	A	G	-0.0138	0.044045	0.754043	35368	0.00876
PCSK9	rs111876364	2	184646503	T	C	-0.0089	0.024969	0.721513	35360	0.02814
PCSK9	rs112155453	17	19867744	G	C	-0.004	0.014827	0.787332	35365	0.08505
PCSK9	rs11233370	11	82911365	A	G	-0.1585	0.078892	0.044528	35343	0.00268
PCSK9	rs113323647	2	143155061	G	C	0.0076	0.035534	0.830643	35365	0.01326
PCSK9	rs11506727	9	8005793	G	C	0.0014	0.009212	0.879208	35375	0.25571
PCSK9	rs115095886	3	186070104	A	G	0.0143	0.016821	0.395244	35361	0.06225
PCSK9	rs11595324	10	100219661	C	T	-0.0066	0.026623	0.804204	35368	0.02376
PCSK9	rs11631516	15	93827914	A	G	-0.0031	0.008713	0.721999	35358	0.35425
PCSK9	rs116423554	4	76954746	T	C	-0.011	0.016034	0.492695	35366	0.06988
PCSK9	rs1168124	1	62674059	T	C	0.0353	0.008739	5.36e-05	35358	0.33754
PCSK9	rs117300236	17	46675984	G	A	-0.0167	0.010119	0.098872	35360	0.2346
PCSK9	rs117497956	7	103514066	G	C	0.0046	0.037553	0.902507	35369	0.01204
PCSK9	rs117725179	10	34478547	C	T	-0.0501	0.039677	0.206695	35344	0.01057
PCSK9	rs117868510	9	108392271	A	G	-0.0009	0.020537	0.965046	35363	0.03995
PCSK9	rs117943988	7	84692321	G	A	0.0841	0.040316	0.036978	35349	0.00961
PCSK9	rs118083772	7	41383938	T	C	-0.0693	0.073149	0.343445	35353	0.00307
PCSK9	rs12193976	6	94563482	A	G	-0.0776	0.05906	0.188872	35343	0.00511
PCSK9	rs1260326	2	27508073	C	T	-0.0508	0.008695	5.15e-09	35373	0.34132
PCSK9	rs12652795	5	157001782	CCCCATT	ACCCATT	0.0127	0.0084	0.130569	35351	0.40044
PCSK9	rs12662735	6	134487310	A	C	-0.0023	0.008661	0.790575	35373	0.34793
PCSK9	rs12740374	1	109274968	T	G	-0.0273	0.010211	0.007503	35344	0.20782
PCSK9	rs12906502	15	78357067	T	G	-0.0117	0.00941	0.213744	35361	0.25556
PCSK9	rs12910436	15	88365906	G	A	-0.0132	0.012029	0.272473	35350	0.13455
PCSK9	rs12944238	17	31436355	A	G	0.0054	0.013538	0.689988	35361	0.10089
PCSK9	rs13226650	7	73602675	G	A	0.0009	0.010866	0.93399	35354	0.196
PCSK9	rs13398112	2	67601480	CGC	CGT	-0.0064	0.010314	0.534935	35359	0.19949
PCSK9	rs138911101	15	83432452	G	T	0.1153	0.073064	0.11455	35366	0.00329
PCSK9	rs140613504	1	193500925	T	C	-0.034	0.035259	0.334897	35345	0.01351
PCSK9	rs1408566	13	107229537	T	C	-0.0273	0.011258	0.015309	35363	0.15856
PCSK9	rs141469619	11	116843577	G	A	0.0282	0.036583	0.440793	35377	0.01201
PCSK9	rs142665780	20	18983541	GCACCCTGCCTGCCTCTTGCTGCCT	CCACCCTGCCTGCCTCTTGCTGCCT	0.0064	0.042577	0.880516	35373	0.00914
PCSK9	rs142921362	6	63139010	G	A	-0.0278	0.016985	0.101684	35350	0.06348
PCSK9	rs143739812	4	153356357	T	C	-0.0116	0.025688	0.65158	35375	0.02642
PCSK9	rs144019272	16	10967811	A	G	-0.0093	0.033052	0.778426	35383	0.01549
PCSK9	rs144175075	22	36485370	T	C	0.001	0.051683	0.984563	35383	0.00534
PCSK9	rs144310047	15	44344211	T	G	-0.0229	0.022169	0.301614	35363	0.03539
PCSK9	rs147243898	11	112081459	TCCATCTCTA	CCCATCTCTA	-0.0225	0.022764	0.32296	35364	0.03394
PCSK9	rs147440796	7	73409437	C	T	0.0001	0.034377	0.997679	35354	0.02484
PCSK9	rs150371564	10	29361278	T	A	-0.004	0.05622	0.943279	35363	0.00567
PCSK9	rs150791	21	42040934	A	G	-0.0078	0.012065	0.517953	35367	0.13178
PCSK9	rs1525599	2	141021133	A	G	0.01	0.012285	0.415634	35354	0.12955
PCSK9	rs1569446	6	16114017	G	A	-0.0106	0.008199	0.196088	35381	0.48886
PCSK9	rs17363522	5	116674146	A	G	-0.0248	0.031324	0.428519	35361	0.01735
PCSK9	rs17410962	8	19990569	A	G	0.0345	0.013809	0.012479	35368	0.09642
PCSK9	rs189879235	8	35126897	C	T	0.0092	0.019642	0.639512	35370	0.0457
PCSK9	rs189954364	11	97045967	T	C	0.0121	0.031239	0.698509	35359	0.01778
PCSK9	rs1961	5	59149566	G	A	-0.0062	0.008336	0.457007	35360	0.4023
PCSK9	rs199717562	1	55026178	G	A	-0.0476	0.009677	8.71e-07	35362	0.23664
PCSK9	rs219235	7	151258679	A	G	-0.0053	0.010455	0.612198	35373	0.19594
PCSK9	rs2509971	11	62415966	G	A	-0.006	0.01216	0.621702	35363	0.13408
PCSK9	rs2738447	19	11116804	C	A	0.028	0.008298	0.0007402	35381	0.43059
PCSK9	rs2738588	16	78646858	A	G	-0.0086	0.008254	0.297462	35367	0.44593
PCSK9	rs2749036	6	52769339	A	T	-0.0206	0.00858	0.016355	35366	0.36222
PCSK9	rs2829779	21	25495706	A	G	0.0029	0.009548	0.761338	35367	0.24461
PCSK9	rs28544889	7	130775532	A	C	-0.0021	0.009245	0.820302	35352	0.27493
PCSK9	rs28601761	8	125487789	G	C	-0.047	0.008325	1.65e-08	35369	0.42975
PCSK9	rs311449	1	25064907	A	C	-0.0026	0.008904	0.77029	35372	0.32539
PCSK9	rs34333692	3	55317169	T	C	-0.0237	0.018664	0.204141	35349	0.05066
PCSK9	rs35193120	8	139122013	A	C	0.0192	0.012481	0.123956	35375	0.12209
PCSK9	rs355845	2	164767839	A	T	0.0036	0.008697	0.678936	35353	0.34763
PCSK9	rs4234798	4	7218206	GAGATCCTGC	TAGATCCTGC	-0.0052	0.008275	0.529744	35380	0.4389
PCSK9	rs4245791	2	43847292	T	C	-0.0041	0.009263	0.658047	35362	0.27966
PCSK9	rs4395776	6	6381296	T	C	-0.0362	0.014067	0.010068	35378	0.09677
PCSK9	rs4489092	5	91124827	T	G	0.0029	0.008842	0.742937	35340	0.33826
PCSK9	rs45549538	18	11982211	T	C	0.0214	0.016914	0.205799	35368	0.06213
PCSK9	rs4598523	1	97945060	T	C	-0.0163	0.009632	0.090602	35361	0.24879
PCSK9	rs4646257	8	18405036	C	T	-0.0108	0.011362	0.341831	35377	0.15929
PCSK9	rs4809641	20	37447464	A	C	-0.0096	0.0105	0.360583	35368	0.19022
PCSK9	rs556107	1	234717312	T	C	0.0356	0.008313	1.85e-05	35355	0.4462
PCSK9	rs573922	15	58447895	T	C	-0.0545	0.012154	7.33e-06	35366	0.13219
PCSK9	rs57792106	12	127929686	A	C	-0.0305	0.026216	0.244656	35382	0.02539
PCSK9	rs58542926	19	19268740	TGGAGCTGTATTTGCCTTCCATGGTGCA	CGGAGCTGTATTTGCCTTCCATGGTGCA	-0.1098	0.015506	1.43e-12	35353	0.07691
PCSK9	rs58593776	2	240406167	C	G	-0.003	0.047059	0.94917	35273	0.00838
PCSK9	rs58830878	1	5635962	C	G	-0.0021	0.008345	0.80131	35384	0.47641
PCSK9	rs59347135	8	19892533	G	C	0.0068	0.020189	0.736259	35368	0.04299
PCSK9	rs59882870	7	76009103	A	G	0.0118	0.011154	0.290097	35350	0.16061
PCSK9	rs6037751	20	4083180	A	G	0.0081	0.009625	0.400031	35371	0.29267
PCSK9	rs6090040	20	64060707	C	A	-0.0101	0.008223	0.219323	34870	0.48437
PCSK9	rs6102034	20	40557950	G	C	-0.0104	0.009289	0.262902	35373	0.26624
PCSK9	rs62158853	2	113111989	T	C	-0.0069	0.008179	0.398855	35356	0.44924
PCSK9	rs622871	6	31910718	G	A	0.023	0.008703	0.008226	35441	0.32877
PCSK9	rs6453511	5	80272237	G	C	-0.0022	0.008412	0.793691	35341	0.43224
PCSK9	rs6490794	13	23427805	C	G	-0.0053	0.008854	0.549454	35382	0.31043
PCSK9	rs6499228	16	69504371	G	A	-0.004	0.01651	0.808568	35370	0.06841
PCSK9	rs650865	1	244279068	A	G	-0.0191	0.019686	0.331919	35346	0.04417
PCSK9	rs6602885	10	46235002	A	G	-0.0244	0.016411	0.137061	35326	0.06945
PCSK9	rs660745	19	48716202	C	T	0.0299	0.008523	0.0004511	35378	0.3758
PCSK9	rs67215541	7	51549770	C	A	-0.0188	0.009992	0.059901	35341	0.2144
PCSK9	rs6813330	4	105564588	C	T	-0.0037	0.008241	0.653434	35348	0.42359
PCSK9	rs7028168	9	106022256	G	A	0.0076	0.014932	0.61076	35365	0.08139
PCSK9	rs71541363	7	137650524	T	G	0.0107	0.028439	0.706734	35375	0.02185
PCSK9	rs72761286	15	100659334	G	C	-0.0059	0.018658	0.751841	35325	0.05268
PCSK9	rs72882439	6	61929243	C	T	-0.029	0.038278	0.448678	35349	0.01183
PCSK9	rs72907256	2	190930252	T	C	0.0123	0.030169	0.683489	35372	0.01953
PCSK9	rs72988687	3	903530	G	A	0.0304	0.036042	0.398969	35231	0.01292
PCSK9	rs73015021	19	11082239	G	A	-0.082	0.014402	1.24e-08	35379	0.08924
PCSK9	rs738408	22	43928850	T	C	-0.0248	0.009783	0.011244	35372	0.22998
PCSK9	rs74558764	15	57534813	ACACT	GCACT	0.0436	0.053336	0.413663	35360	0.00626
PCSK9	rs74617384	6	160576086	T	A	0.0163	0.017265	0.345115	35388	0.06155
PCSK9	rs74671360	11	15156053	G	A	0.0065	0.027655	0.814181	35368	0.02031
PCSK9	rs7558873	2	12486454	A	G	-0.0011	0.014639	0.940103	35371	0.08401
PCSK9	rs75614366	13	106125045	T	C	-0.015	0.013718	0.274202	35365	0.10153
PCSK9	rs7663772	4	88866151	A	G	-0.0054	0.008126	0.506324	35349	0.46575
PCSK9	rs77301115	19	44893716	A	G	0.0853	0.025697	0.0009018	35368	0.0254
PCSK9	rs77573848	5	97083043	A	G	0.0154	0.046319	0.739529	35345	0.00847
PCSK9	rs78159704	3	16691245	T	C	-0.0418	0.04399	0.342008	35370	0.00886
PCSK9	rs78277979	18	49750572	A	C	0.025	0.011226	0.025953	35365	0.16003
PCSK9	rs7901624	10	19540750	A	G	0.0172	0.009813	0.079649	35357	0.23102
PCSK9	rs79192210	19	58049944	T	G	0.0136	0.024176	0.57374	35159	0.02916
PCSK9	rs79429216	19	44942260	A	G	0.098	0.05027	0.051238	35368	0.0064
PCSK9	rs79694606	5	149811236	A	G	0.0113	0.019099	0.554086	35369	0.0476
PCSK9	rs79711323	17	62717483	T	C	0.004	0.011432	0.726421	35368	0.15089
PCSK9	rs79866533	14	51894636	C	T	-0.0787	0.039112	0.044201	35368	0.01065
PCSK9	rs8191752	6	160026975	G	C	-0.0392	0.026256	0.135441	35390	0.02502
PCSK9	rs881214	16	81532945	A	G	0.0081	0.008236	0.325339	35375	0.45904
PCSK9	rs927173	20	56439671	C	G	0.0101	0.009704	0.297954	35385	0.23671
PCSK9	rs9488860	6	116174554	T	G	-0.001	0.008642	0.907878	35353	0.43212
PCSK9	rs964184	11	116778201	C	G	-0.0336	0.012425	0.006848	35377	0.12321

## Sheet: Table S3 BIMR exposure
chr.exposure	pos.exposure	beta.exposure	se.exposure	pval.exposure	samplesize.exposure	id.exposure	SNP	effect_allele.exposure	other_allele.exposure	eaf.exposure	exposure	ncase.exposure	ncontrol.exposure
1	234853059	0.105624	0.0232803	5.77923e-06	349222	ebi-a-GCST90104007	rs556107	T	C	0.52239	Hyprelipidemia	5153	344069
1	98410616	-0.115207	0.0270792	2.5998e-05	349222	ebi-a-GCST90104007	rs4598523	T	C	0.780523	Hyprelipidemia	5153	344069
1	244442370	-0.231141	0.0535896	3.05007e-05	349222	ebi-a-GCST90104007	rs650865	A	G	0.959644	Hyprelipidemia	5153	344069
1	5696022	0.0956342	0.0231786	3.8562e-05	349222	ebi-a-GCST90104007	rs58830878	C	G	0.456782	Hyprelipidemia	5153	344069
1	63139730	0.243265	0.0248987	8.8369e-23	349222	ebi-a-GCST90104007	rs1168124	T	C	0.649149	Hyprelipidemia	5153	344069
1	55491851	-0.141533	0.0321739	8.61966e-06	349222	ebi-a-GCST90104007	rs199717562	G	A	0.195154	Hyprelipidemia	5153	344069
1	193470055	0.307309	0.0709414	3.53965e-05	349222	ebi-a-GCST90104007	rs140613504	T	C	0.020815	Hyprelipidemia	5153	344069
1	109817590	-0.384929	0.030245	8.63575e-39	349222	ebi-a-GCST90104007	rs12740374	T	G	0.221896	Hyprelipidemia	5153	344069
1	25391398	0.107007	0.0246464	1.64638e-05	349222	ebi-a-GCST90104007	rs311449	A	C	0.307286	Hyprelipidemia	5153	344069
2	44074431	-0.147952	0.0240253	1.1024e-09	349222	ebi-a-GCST90104007	rs4245791	T	C	0.674748	Hyprelipidemia	5153	344069
2	185511230	0.259188	0.0600948	3.23743e-05	349222	ebi-a-GCST90104007	rs111876364	T	C	0.032502	Hyprelipidemia	5153	344069
2	241345584	-0.844493	0.21369	5.2808e-06	349222	ebi-a-GCST90104007	rs58593776	C	G	0.006535	Hyprelipidemia	5153	344069
2	27730940	-0.306791	0.0225681	1.68151e-40	349222	ebi-a-GCST90104007	rs1260326	C	T	0.606485	Hyprelipidemia	5153	344069
2	67828614	0.118738	0.0278643	2.55847e-05	349222	ebi-a-GCST90104007	rs13398112	C	T	0.203574	Hyprelipidemia	5153	344069
2	12626580	-0.175222	0.0400814	8.07607e-06	349222	ebi-a-GCST90104007	rs7558873	A	G	0.108606	Hyprelipidemia	5153	344069
2	21203877	-0.223907	0.0294279	1.05051e-14	349222	ebi-a-GCST90104007	rs10184054	G	C	0.221728	Hyprelipidemia	5153	344069
2	165624349	-0.115521	0.0236143	1.15715e-06	349222	ebi-a-GCST90104007	rs355845	A	T	0.621628	Hyprelipidemia	5153	344069
2	227067188	0.106067	0.0253996	2.72151e-05	349222	ebi-a-GCST90104007	rs114562459	G	T	0.67535	Hyprelipidemia	5153	344069
2	191794978	0.320471	0.0733994	3.17285e-05	349222	ebi-a-GCST90104007	rs72907256	T	C	0.019223	Hyprelipidemia	5153	344069
2	141778702	-0.154826	0.0381096	3.5216e-05	349222	ebi-a-GCST90104007	rs1525599	A	G	0.117231	Hyprelipidemia	5153	344069
2	143912630	0.264697	0.059079	1.66587e-05	349222	ebi-a-GCST90104007	rs113323647	G	C	0.03148	Hyprelipidemia	5153	344069
2	113869566	-0.103438	0.0238938	1.43724e-05	349222	ebi-a-GCST90104007	rs62158853	T	C	0.399129	Hyprelipidemia	5153	344069
3	55351197	0.243218	0.0561674	2.97098e-05	349222	ebi-a-GCST90104007	rs34333692	T	C	0.035704	Hyprelipidemia	5153	344069
3	185787893	-0.23956	0.0600458	3.64771e-05	349222	ebi-a-GCST90104007	rs115095886	A	G	0.047995	Hyprelipidemia	5153	344069
3	945213	0.324916	0.0715173	1.50539e-05	349222	ebi-a-GCST90104007	rs72988687	G	A	0.020391	Hyprelipidemia	5153	344069
3	16732752	0.334977	0.074447	1.89479e-05	349222	ebi-a-GCST90104007	rs78159704	T	C	0.018267	Hyprelipidemia	5153	344069
4	7219933	0.102381	0.0240807	2.02279e-05	349222	ebi-a-GCST90104007	rs4234798	G	T	0.615309	Hyprelipidemia	5153	344069
4	89787302	-0.0966679	0.0238628	4.92493e-05	349222	ebi-a-GCST90104007	rs7663772	A	G	0.400276	Hyprelipidemia	5153	344069
4	154277509	0.231605	0.0551803	4.98816e-05	349222	ebi-a-GCST90104007	rs143739812	T	C	0.038116	Hyprelipidemia	5153	344069
4	77875899	0.16983	0.0383775	1.52728e-05	349222	ebi-a-GCST90104007	rs116423554	T	C	0.087838	Hyprelipidemia	5153	344069
4	106485745	-0.104211	0.0250118	2.92516e-05	349222	ebi-a-GCST90104007	rs6813330	C	T	0.368285	Hyprelipidemia	5153	344069
5	58445393	0.0976141	0.0233871	3.23497e-05	349222	ebi-a-GCST90104007	rs1961	G	A	0.399585	Hyprelipidemia	5153	344069
5	90420644	0.114816	0.0245234	2.63457e-06	349222	ebi-a-GCST90104007	rs4489092	T	G	0.630397	Hyprelipidemia	5153	344069
5	24496004	0.313989	0.0705523	2.13157e-05	349222	ebi-a-GCST90104007	rs141023861	A	C	0.022981	Hyprelipidemia	5153	344069
5	96418747	-0.55913	0.129403	2.30123e-06	349222	ebi-a-GCST90104007	rs77573848	A	G	0.013791	Hyprelipidemia	5153	344069
5	116009842	0.372173	0.0834547	2.49144e-05	349222	ebi-a-GCST90104007	rs17363522	A	G	0.014167	Hyprelipidemia	5153	344069
5	79568056	0.0967234	0.0236334	4.17023e-05	349222	ebi-a-GCST90104007	rs6453511	G	C	0.576667	Hyprelipidemia	5153	344069
5	149190799	-0.249717	0.0625163	3.47368e-05	349222	ebi-a-GCST90104007	rs79694606	A	G	0.045023	Hyprelipidemia	5153	344069
5	156428793	0.132976	0.0243976	5.6404e-08	349222	ebi-a-GCST90104007	rs12652795	C	A	0.460285	Hyprelipidemia	5153	344069
6	95273200	0.382199	0.0828284	1.32902e-05	349222	ebi-a-GCST90104007	rs12193976	A	G	0.013902	Hyprelipidemia	5153	344069
6	160997118	0.238143	0.0386422	2.49672e-09	349222	ebi-a-GCST90104007	rs74617384	T	A	0.080324	Hyprelipidemia	5153	344069
6	62639148	0.41981	0.0950396	2.92631e-05	349222	ebi-a-GCST90104007	rs72882439	C	T	0.013277	Hyprelipidemia	5153	344069
6	16114248	-0.0987872	0.0235668	2.74574e-05	349222	ebi-a-GCST90104007	rs1569446	G	A	0.446783	Hyprelipidemia	5153	344069
6	160448007	-0.394322	0.0993098	2.49006e-05	349222	ebi-a-GCST90104007	rs8191752	G	C	0.020486	Hyprelipidemia	5153	344069
6	52634137	-0.109362	0.0234349	3.43013e-06	349222	ebi-a-GCST90104007	rs2749036	A	T	0.60393	Hyprelipidemia	5153	344069
6	63848915	-0.313768	0.0670927	1.02e-06	349222	ebi-a-GCST90104007	rs142921362	G	A	0.042115	Hyprelipidemia	5153	344069
6	31878495	0.116608	0.0254473	4.06631e-06	349222	ebi-a-GCST90104007	rs622871	G	A	0.684856	Hyprelipidemia	5153	344069
6	116495717	-0.103752	0.0235586	1.03512e-05	349222	ebi-a-GCST90104007	rs9488860	T	G	0.42482	Hyprelipidemia	5153	344069
6	6381529	-0.15053	0.0322853	4.73893e-06	349222	ebi-a-GCST90104007	rs4395776	T	C	0.865532	Hyprelipidemia	5153	344069
6	134808448	-0.107167	0.0250509	1.73764e-05	349222	ebi-a-GCST90104007	rs12662735	A	C	0.336421	Hyprelipidemia	5153	344069
7	84321637	0.307849	0.0695158	2.35348e-05	349222	ebi-a-GCST90104007	rs117943988	G	A	0.021604	Hyprelipidemia	5153	344069
7	130460291	0.154106	0.0240851	2.47959e-10	349222	ebi-a-GCST90104007	rs28544889	A	C	0.322776	Hyprelipidemia	5153	344069
7	51617467	-0.118947	0.0296256	4.99505e-05	349222	ebi-a-GCST90104007	rs67215541	C	A	0.206461	Hyprelipidemia	5153	344069
7	150955765	-0.11964	0.0289278	2.96681e-05	349222	ebi-a-GCST90104007	rs219235	A	G	0.21839	Hyprelipidemia	5153	344069
7	103154513	-0.394704	0.0954606	1.10759e-05	349222	ebi-a-GCST90104007	rs117497956	G	C	0.021558	Hyprelipidemia	5153	344069
7	73017005	-0.223098	0.0307749	1.56531e-13	349222	ebi-a-GCST90104007	rs13226650	G	A	0.19914	Hyprelipidemia	5153	344069
7	41423536	0.399511	0.0898768	2.97584e-05	349222	ebi-a-GCST90104007	rs118083772	T	C	0.011278	Hyprelipidemia	5153	344069
7	137335270	0.326272	0.0750223	3.59385e-05	349222	ebi-a-GCST90104007	rs71541363	T	G	0.017822	Hyprelipidemia	5153	344069
7	72823767	0.28636	0.0658868	2.88629e-05	349222	ebi-a-GCST90104007	rs147440796	C	T	0.032923	Hyprelipidemia	5153	344069
7	75638421	0.125137	0.0300506	4.0452e-05	349222	ebi-a-GCST90104007	rs59882870	A	G	0.164989	Hyprelipidemia	5153	344069
8	19848080	-0.391176	0.0410581	3.04018e-23	349222	ebi-a-GCST90104007	rs17410962	A	G	0.117939	Hyprelipidemia	5153	344069
8	18262546	-0.129863	0.0289645	9.8712e-06	349222	ebi-a-GCST90104007	rs4646257	C	T	0.819001	Hyprelipidemia	5153	344069
8	19750044	0.247115	0.0513793	3.45168e-06	349222	ebi-a-GCST90104007	rs59347135	G	C	0.04562	Hyprelipidemia	5153	344069
8	140134256	-0.166331	0.0368293	4.2032e-06	349222	ebi-a-GCST90104007	rs35193120	A	C	0.127299	Hyprelipidemia	5153	344069
8	34984415	-0.276258	0.0638185	6.74512e-06	349222	ebi-a-GCST90104007	rs189879235	C	T	0.044287	Hyprelipidemia	5153	344069
8	126500031	-0.30649	0.0238556	1.27087e-37	349222	ebi-a-GCST90104007	rs28601761	G	C	0.419404	Hyprelipidemia	5153	344069
9	8005793	0.11476	0.0271914	2.9814e-05	349222	ebi-a-GCST90104007	rs11506727	G	C	0.229226	Hyprelipidemia	5153	344069
9	111154551	0.242892	0.0575144	4.57025e-05	349222	ebi-a-GCST90104007	rs117868510	A	G	0.036045	Hyprelipidemia	5153	344069
9	108784537	-0.172055	0.0401917	1.25037e-05	349222	ebi-a-GCST90104007	rs7028168	G	A	0.108858	Hyprelipidemia	5153	344069
10	101979418	0.235369	0.0548425	3.3104e-05	349222	ebi-a-GCST90104007	rs11595324	C	T	0.040119	Hyprelipidemia	5153	344069
10	34767475	-0.367268	0.0898878	1.53486e-05	349222	ebi-a-GCST90104007	rs117725179	C	T	0.023683	Hyprelipidemia	5153	344069
10	19829679	-0.111726	0.0269361	4.06481e-05	349222	ebi-a-GCST90104007	rs7901624	A	G	0.771702	Hyprelipidemia	5153	344069
10	47606238	-0.16681	0.0415232	4.27258e-05	349222	ebi-a-GCST90104007	rs6602885	A	G	0.102943	Hyprelipidemia	5153	344069
10	29650207	0.517577	0.113693	2.42343e-05	349222	ebi-a-GCST90104007	rs150371564	T	A	0.007212	Hyprelipidemia	5153	344069
11	82622407	-0.557939	0.140502	1.48597e-05	349222	ebi-a-GCST90104007	rs11233370	A	G	0.012194	Hyprelipidemia	5153	344069
11	15177599	0.330752	0.0725967	1.47686e-05	349222	ebi-a-GCST90104007	rs74671360	G	A	0.019188	Hyprelipidemia	5153	344069
11	116714293	0.513838	0.097638	9.99425e-07	349222	ebi-a-GCST90104007	rs141469619	G	A	0.010141	Hyprelipidemia	5153	344069
11	96916967	0.302079	0.0610249	2.15477e-06	349222	ebi-a-GCST90104007	rs189954364	T	C	0.030416	Hyprelipidemia	5153	344069
11	62183438	-0.132154	0.0317739	4.23701e-05	349222	ebi-a-GCST90104007	rs2509971	G	A	0.854888	Hyprelipidemia	5153	344069
11	116648917	-0.505492	0.0280293	1.30227e-63	349222	ebi-a-GCST90104007	rs964184	C	G	0.867916	Hyprelipidemia	5153	344069
11	111952183	-0.284572	0.0669864	9.52818e-06	349222	ebi-a-GCST90104007	rs147243898	T	C	0.040743	Hyprelipidemia	5153	344069
12	107563406	0.125395	0.030486	4.74471e-05	349222	ebi-a-GCST90104007	rs61942442	T	A	0.217363	Hyprelipidemia	5153	344069
12	128414231	-0.24106	0.0594208	2.69706e-05	349222	ebi-a-GCST90104007	rs57792106	A	C	0.049389	Hyprelipidemia	5153	344069
12	52610906	0.163767	0.0383278	2.77741e-05	349222	ebi-a-GCST90104007	rs10557733	T	C	0.123363	Hyprelipidemia	5153	344069
12	65568956	-0.756779	0.177406	1.5598e-06	349222	ebi-a-GCST90104007	rs11175664	A	G	0.009457	Hyprelipidemia	5153	344069
13	106777394	0.168335	0.0402535	4.39157e-05	349222	ebi-a-GCST90104007	rs75614366	T	C	0.079395	Hyprelipidemia	5153	344069
13	107881885	-0.154268	0.0316892	1.7766e-06	349222	ebi-a-GCST90104007	rs1408566	T	C	0.859719	Hyprelipidemia	5153	344069
13	24001944	-0.120452	0.0249415	1.68943e-06	349222	ebi-a-GCST90104007	rs6490794	C	G	0.692681	Hyprelipidemia	5153	344069
14	52361354	0.430598	0.0975575	3.45231e-05	349222	ebi-a-GCST90104007	rs79866533	C	T	0.010221	Hyprelipidemia	5153	344069
15	58740094	-0.129781	0.0301416	2.21167e-05	349222	ebi-a-GCST90104007	rs573922	T	C	0.835104	Hyprelipidemia	5153	344069
15	94371143	-0.105569	0.0246811	1.78447e-05	349222	ebi-a-GCST90104007	rs11631516	A	G	0.371733	Hyprelipidemia	5153	344069
15	84101204	-0.724532	0.189217	1.65653e-05	349222	ebi-a-GCST90104007	rs138911101	G	T	0.00769	Hyprelipidemia	5153	344069
15	101199539	-0.248081	0.0625388	4.0218e-05	349222	ebi-a-GCST90104007	rs72761286	G	C	0.046987	Hyprelipidemia	5153	344069
15	78649409	0.117833	0.0252634	3.83637e-06	349222	ebi-a-GCST90104007	rs12906502	T	G	0.281125	Hyprelipidemia	5153	344069
15	88909137	-0.150085	0.0372911	4.31281e-05	349222	ebi-a-GCST90104007	rs12910436	G	A	0.129986	Hyprelipidemia	5153	344069
15	57827011	0.397174	0.0910487	3.93795e-05	349222	ebi-a-GCST90104007	rs74558764	A	G	0.011894	Hyprelipidemia	5153	344069
15	44636409	0.311151	0.0719771	3.47584e-05	349222	ebi-a-GCST90104007	rs144310047	T	G	0.022868	Hyprelipidemia	5153	344069
16	69538274	-0.225141	0.0467977	7.73054e-07	349222	ebi-a-GCST90104007	rs6499228	G	A	0.090423	Hyprelipidemia	5153	344069
16	11061668	-0.49167	0.121635	1.24569e-05	349222	ebi-a-GCST90104007	rs144019272	A	G	0.014759	Hyprelipidemia	5153	344069
16	49042275	0.23397	0.0537437	2.62078e-05	349222	ebi-a-GCST90104007	rs74466321	T	C	0.039286	Hyprelipidemia	5153	344069
16	78680755	-0.110709	0.0232598	2.10649e-06	349222	ebi-a-GCST90104007	rs2738588	A	G	0.556499	Hyprelipidemia	5153	344069
16	81566550	0.0951271	0.023318	4.61509e-05	349222	ebi-a-GCST90104007	rs881214	A	G	0.49318	Hyprelipidemia	5153	344069
17	44753350	-0.119912	0.0270499	1.13425e-05	349222	ebi-a-GCST90104007	rs117300236	G	A	0.724928	Hyprelipidemia	5153	344069
17	80541534	-0.198789	0.0423485	1.91342e-06	349222	ebi-a-GCST90104007	rs200280139	C	A	0.174775	Hyprelipidemia	5153	344069
17	19771057	0.157117	0.0355074	1.44951e-05	349222	ebi-a-GCST90104007	rs112155453	G	C	0.109009	Hyprelipidemia	5153	344069
17	29763373	0.159523	0.0350281	8.2194e-06	349222	ebi-a-GCST90104007	rs12944238	A	G	0.108609	Hyprelipidemia	5153	344069
17	60794844	0.157434	0.0328565	2.57075e-06	349222	ebi-a-GCST90104007	rs79711323	T	C	0.137977	Hyprelipidemia	5153	344069
18	11982210	0.212562	0.044765	4.13e-06	349222	ebi-a-GCST90104007	rs45549538	T	C	0.059123	Hyprelipidemia	5153	344069
18	47276942	0.153077	0.031344	1.63268e-06	349222	ebi-a-GCST90104007	rs78277979	A	C	0.144574	Hyprelipidemia	5153	344069
19	45413233	-0.795973	0.0567999	4.70002e-53	349222	ebi-a-GCST90104007	rs1065853	T	G	0.079517	Hyprelipidemia	5153	344069
19	45445517	0.449124	0.0849516	7.82654e-07	349222	ebi-a-GCST90104007	rs79429216	A	G	0.012372	Hyprelipidemia	5153	344069
19	19379549	-0.379227	0.050902	5.31863e-15	349222	ebi-a-GCST90104007	rs58542926	T	C	0.075342	Hyprelipidemia	5153	344069
19	58561312	0.232278	0.0463215	1.24773e-06	349222	ebi-a-GCST90104007	rs79192210	T	G	0.053625	Hyprelipidemia	5153	344069
19	11192915	-0.283905	0.0395627	1.32404e-13	349222	ebi-a-GCST90104007	rs73015021	G	A	0.118855	Hyprelipidemia	5153	344069
19	45396973	0.349266	0.0624069	1.08643e-07	349222	ebi-a-GCST90104007	rs77301115	A	G	0.025895	Hyprelipidemia	5153	344069
19	49219459	0.156391	0.0233769	2.29351e-11	349222	ebi-a-GCST90104007	rs660745	C	T	0.54601	Hyprelipidemia	5153	344069
19	11227480	0.0995244	0.0238024	2.80718e-05	349222	ebi-a-GCST90104007	rs2738447	C	A	0.592345	Hyprelipidemia	5153	344069
20	62692060	-0.0960021	0.0232443	3.73878e-05	349222	ebi-a-GCST90104007	rs6090040	C	A	0.520558	Hyprelipidemia	5153	344069
20	36075866	0.142426	0.0325801	1.69989e-05	349222	ebi-a-GCST90104007	rs4809641	A	C	0.150626	Hyprelipidemia	5153	344069
20	4063827	0.115602	0.0272051	1.85708e-05	349222	ebi-a-GCST90104007	rs6037751	A	G	0.737394	Hyprelipidemia	5153	344069
20	51323890	-0.565073	0.14288	2.26804e-05	349222	ebi-a-GCST90104007	rs549929448	C	T	0.017631	Hyprelipidemia	5153	344069
20	39186590	-0.126685	0.0254438	5.54549e-07	349222	ebi-a-GCST90104007	rs6102034	G	C	0.3258	Hyprelipidemia	5153	344069
20	55014727	0.122143	0.0262096	4.05695e-06	349222	ebi-a-GCST90104007	rs927173	C	G	0.245426	Hyprelipidemia	5153	344069
20	18964185	0.523535	0.115177	2.32397e-05	349222	ebi-a-GCST90104007	rs142665780	G	C	0.008853	Hyprelipidemia	5153	344069
21	43461043	-0.199275	0.0457283	8.42423e-06	349222	ebi-a-GCST90104007	rs150791	A	G	0.1035	Hyprelipidemia	5153	344069
21	26868018	0.109102	0.0269486	4.54894e-05	349222	ebi-a-GCST90104007	rs2829779	A	G	0.735683	Hyprelipidemia	5153	344069
22	44324730	-0.136031	0.0291488	2.37624e-06	349222	ebi-a-GCST90104007	rs738408	T	C	0.215982	Hyprelipidemia	5153	344069
22	36881417	-0.732122	0.198146	2.93528e-05	349222	ebi-a-GCST90104007	rs144175075	T	C	0.006914	Hyprelipidemia	5153	344069

## Sheet: Table S4 naringenin targets
Drug	MolId	MolName	TargetName	Symbol			naringenin-OS	naringenin-LM
Qingpi	MOL004328	naringenin	Apoptosis regulator Bcl-2	BCL2			BCL2	APOB
Qingpi	MOL004328	naringenin	Microsomal triglyceride transfer protein large subunit	MTTP			PTGS2	LDLR
Qingpi	MOL004328	naringenin	Prostaglandin G/H synthase 1	PTGS1			AKT1	HMGCR
Qingpi	MOL004328	naringenin	Estrogen receptor	ESR1			MAPK3	MTTP
Qingpi	MOL004328	naringenin	Prostaglandin G/H synthase 2	PTGS2			MAPK1	PPARA
Qingpi	MOL004328	naringenin	Transcription factor p65	RELA			CASP3	ADIPOQ
Qingpi	MOL004328	naringenin	RAC-alpha serine/threonine-protein kinase	AKT1			SOD1
Qingpi	MOL004328	naringenin	Mitogen-activated protein kinase 3	MAPK3			CAT
Qingpi	MOL004328	naringenin	Mitogen-activated protein kinase 1	MAPK1			PPARG
Qingpi	MOL004328	naringenin	Caspase-3	CASP3			GSTP1
Qingpi	MOL004328	naringenin	Fatty acid synthase	FASN			GSR
Qingpi	MOL004328	naringenin	Low-density lipoprotein receptor	LDLR
Qingpi	MOL004328	naringenin	Superoxide dismutase [Cu-Zn]	SOD1
Qingpi	MOL004328	naringenin	Catalase	CAT
Qingpi	MOL004328	naringenin	Peroxisome proliferator-activated receptor gamma	PPARG
Qingpi	MOL004328	naringenin	Apolipoprotein B-100	APOB
Qingpi	MOL004328	naringenin	Phospholipase B1, membrane-associated	PLB1
Qingpi	MOL004328	naringenin	3-hydroxy-3-methylglutaryl-coenzyme A reductase	HMGCR
Qingpi	MOL004328	naringenin	Glutathione S-transferase P	GSTP1
Qingpi	MOL004328	naringenin	Peroxisome proliferator-activated receptor alpha	PPARA
Qingpi	MOL004328	naringenin	Sterol regulatory element-binding protein 1	SREBF1
Qingpi	MOL004328	naringenin	Glutathione reductase, mitochondrial	GSR
Qingpi	MOL004328	naringenin	Multidrug resistance-associated protein 1	ABCC1
Qingpi	MOL004328	naringenin	Adiponectin	ADIPOQ
Qingpi	MOL004328	naringenin	Sterol O-acyltransferase 2	SOAT2
Qingpi	MOL004328	naringenin	Aldo-keto reductase family 1 member C1	AKR1C1
Qingpi	MOL004328	naringenin	Aspartate aminotransferase, cytoplasmic	GOT1
Qingpi	MOL004328	naringenin	4-aminobutyrate aminotransferase, mitochondrial	ABAT
Qingpi	MOL004328	naringenin	Liver carboxylesterase 1	CES1
Qingpi	MOL004328	naringenin	Sterol O-acyltransferase 1	SOAT1

## Sheet: Table S5 oxidative stress>20
Gene Symbol	Description	Category	Uniprot ID	Gifts	GC Id	Relevance score
NOS3	Nitric Oxide Synthase 3	Protein Coding	P29474	59	GC07P158097	78.666
NOS2	Nitric Oxide Synthase 2	Protein Coding	P35228	58	GC17M027756	74.4741
SOD1	Superoxide Dismutase 1	Protein Coding	P00441	61	GC21P031659	60.1521
CAT	Catalase	Protein Coding	P04040	60	GC11P034460	59.7338
NOS1	Nitric Oxide Synthase 1	Protein Coding	P29475	58	GC12M117208	58.0998
NFE2L2	NFE2 Like BZIP Transcription Factor 2	Protein Coding	Q16236	60	GC02M177227	50.6682
TP53	Tumor Protein P53	Protein Coding	P04637	62	GC17M007661	49.9966
HMOX1	Heme Oxygenase 1	Protein Coding	P09601	61	GC22P035380	48.8179
TNF	Tumor Necrosis Factor	Protein Coding	P01375	61	GC06P134820	47.971
SOD2	Superoxide Dismutase 2	Protein Coding	P04179	56	GC06M159669	44.8687
GSR	Glutathione-Disulfide Reductase	Protein Coding	P00390	59	GC08M030678	41.9829
MAPK14	Mitogen-Activated Protein Kinase 14	Protein Coding	Q16539	60	GC06P134977	41.6619
MAPK8	Mitogen-Activated Protein Kinase 8	Protein Coding	P45983	58	GC10P048306	41.4812
MPO	Myeloperoxidase	Protein Coding	P05164	61	GC17M058269	39.1754
XDH	Xanthine Dehydrogenase	Protein Coding	P47989	56	GC02M031334	39.0226
TXN	Thioredoxin	Protein Coding	P10599	55	GC09M110243	37.6282
IL6	Interleukin 6	Protein Coding	P05231	60	GC07P022725	35.4388
CPT2	Carnitine Palmitoyltransferase 2	Protein Coding	P23786	59	GC01P053196	34.5472
MAPK1	Mitogen-Activated Protein Kinase 1	Protein Coding	P28482	61	GC22M021759	34.4124
G6PD	Glucose-6-Phosphate Dehydrogenase	Protein Coding	P11413	59	GC0XM154598	32.9812
OLR1	Oxidized Low Density Lipoprotein Receptor 1	Protein Coding	P78380	51	GC12M029495	32.9787
CYCS	Cytochrome C, Somatic	Protein Coding	P99999	57	GC07M025118	32.6013
CASP3	Caspase 3	Protein Coding	P42574	58	GC04M184627	32.5945
SIRT1	Sirtuin 1	Protein Coding	Q96EB6	58	GC10P067884	32.2564
PARK7	Parkinsonism Associated Deglycase	Protein Coding	Q99497	56	GC01P039429	31.9444
APP	Amyloid Beta Precursor Protein	Protein Coding	P05067	59	GC21M025880	30.3718
IL1B	Interleukin 1 Beta	Protein Coding	P01584	56	GC02M112829	30.1097
PON1	Paraoxonase 1	Protein Coding	P27169	56	GC07M095297	29.8918
NQO1	NAD(P)H Quinone Dehydrogenase 1	Protein Coding	P15559	56	GC16M069706	29.7989
HSPA5	Heat Shock Protein Family A (Hsp70) Member 5	Protein Coding	P11021	58	GC09M125234	29.4062
GPX1	Glutathione Peroxidase 1	Protein Coding	P07203	51	GC03M053731	29.0188
MAP3K5	Mitogen-Activated Protein Kinase Kinase Kinase 5	Protein Coding	Q99683	57	GC06M136557	28.9631
JUN	Jun Proto-Oncogene, AP-1 Transcription Factor Subunit	Protein Coding	P05412	58	GC01M058780	28.7938
INS	Insulin	Protein Coding	P01308	56	GC11M002159	28.623
CXCL8	C-X-C Motif Chemokine Ligand 8	Protein Coding	P10145	53	GC04P073740	28.3632
TXN2	Thioredoxin 2	Protein Coding	Q99757	49	GC22M036467	27.9979
PTGS2	Prostaglandin-Endoperoxide Synthase 2	Protein Coding	P35354	58	GC01M186671	27.9732
EDN1	Endothelin 1	Protein Coding	P05305	58	GC06P012236	27.6819
ALB	Albumin	Protein Coding	P02768	58	GC04P073397	27.6141
OGG1	8-Oxoguanine DNA Glycosylase	Protein Coding	O15527	56	GC03P021488	27.3428
GSTM1	Glutathione S-Transferase Mu 1	Protein Coding	P09488	51	GC01P109687	27.2862
AIFM1	Apoptosis Inducing Factor Mitochondria Associated 1	Protein Coding	O95831	59	GC0XM130129	27.2425
FOXO3	Forkhead Box O3	Protein Coding	O43524	56	GC06P108559	27.219
ACADVL	Acyl-CoA Dehydrogenase Very Long Chain	Protein Coding	P49748	54	GC17P111148	27.1747
PARP1	Poly(ADP-Ribose) Polymerase 1	Protein Coding	P09874	59	GC01M226360	27.1137
DDIT3	DNA Damage Inducible Transcript 3	Protein Coding	P35638	55	GC12M057516	26.9547
ATF4	Activating Transcription Factor 4	Protein Coding	P18848	55	GC22P039519	26.9328
HADHA	Hydroxyacyl-CoA Dehydrogenase Trifunctional Multienzyme Complex Subunit Alpha	Protein Coding	P40939	55	GC02M026190	26.651
PRDX2	Peroxiredoxin 2	Protein Coding	P32119	54	GC19M012796	26.5388
GSTP1	Glutathione S-Transferase Pi 1	Protein Coding	P09211	59	GC11P067583	26.4208
BCL2	BCL2 Apoptosis Regulator	Protein Coding	P10415	59	GC18M063123	26.3427
KEAP1	Kelch Like ECH Associated Protein 1	Protein Coding	Q14145	56	GC19M010486	26.2585
CRP	C-Reactive Protein	Protein Coding	P02741	54	GC01M161311	26.2348
RYR2	Ryanodine Receptor 2	Protein Coding	Q92736	55	GC01P237042	26.0807
HADHB	Hydroxyacyl-CoA Dehydrogenase Trifunctional Multienzyme Complex Subunit Beta	Protein Coding	P55084	54	GC02P026243	26.0632
XBP1	X-Box Binding Protein 1	Protein Coding	P17861	55	GC22M028794	26.0211
AKT1	AKT Serine/Threonine Kinase 1	Protein Coding	P31749	62	GC14M104769	25.8817
NFKB1	Nuclear Factor Kappa B Subunit 1	Protein Coding	P19838	61	GC04P102501	25.7983
FOXO1	Forkhead Box O1	Protein Coding	Q12778	60	GC13M040555	25.6496
PRKN	Parkin RBR E3 Ubiquitin Protein Ligase	Protein Coding	O60260	58	GC06M161348	25.6288
IFNG	Interferon Gamma	Protein Coding	P01579	59	GC12M068154	25.487
EIF2AK3	Eukaryotic Translation Initiation Factor 2 Alpha Kinase 3	Protein Coding	Q9NZJ5	58	GC02M088556	25.3682
HSPB1	Heat Shock Protein Family B (Small) Member 1	Protein Coding	P04792	60	GC07P076302	25.2995
MAPK10	Mitogen-Activated Protein Kinase 10	Protein Coding	P53779	55	GC04M085990	25.2775
CRH	Corticotropin Releasing Hormone	Protein Coding	P06850	52	GC08M066176	25.1491
HSPA4	Heat Shock Protein Family A (Hsp70) Member 4	Protein Coding	P34932	52	GC05P133062	24.9998
ACE	Angiotensin I Converting Enzyme	Protein Coding	P12821	60	GC17P063477	24.9704
HSP90AA1	Heat Shock Protein 90 Alpha Family Class A Member 1	Protein Coding	P07900	60	GC14M102080	24.8975
EIF2S1	Eukaryotic Translation Initiation Factor 2 Subunit Alpha	Protein Coding	P05198	54	GC14P067359	24.7339
HSF1	Heat Shock Transcription Factor 1	Protein Coding	Q00613	56	GC08P144291	24.6537
SLC6A4	Solute Carrier Family 6 Member 4	Protein Coding	P31645	57	GC17M030194	24.548
NARS2	Asparaginyl-TRNA Synthetase 2, Mitochondrial	Protein Coding	Q96I59	52	GC11M078435	24.2709
PRDX5	Peroxiredoxin 5	Protein Coding	P30044	53	GC11P088959	24.2396
CYBA	Cytochrome B-245 Alpha Chain	Protein Coding	P13498	55	GC16M088643	24.0651
HIF1A	Hypoxia Inducible Factor 1 Subunit Alpha	Protein Coding	Q16665	57	GC14P061695	23.9337
CCL2	C-C Motif Chemokine Ligand 2	Protein Coding	P13500	58	GC17P034255	23.9112
GFM1	G Elongation Factor Mitochondrial 1	Protein Coding	Q96RP9	52	GC03P158644	23.9042
GAPDH	Glyceraldehyde-3-Phosphate Dehydrogenase	Protein Coding	P04406	59	GC12P038965	23.8522
BAX	BCL2 Associated X, Apoptosis Regulator	Protein Coding	Q07812	60	GC19P048954	23.7758
MSRA	Methionine Sulfoxide Reductase A	Protein Coding	Q9UJ68	49	GC08P010054	23.7019
ACADM	Acyl-CoA Dehydrogenase Medium Chain	Protein Coding	P11310	55	GC01P075724	23.6732
TGFB1	Transforming Growth Factor Beta 1	Protein Coding	P01137	61	GC19M041301	23.5838
APOE	Apolipoprotein E	Protein Coding	P02649	59	GC19P113251	23.5341
NOS1AP	Nitric Oxide Synthase 1 Adaptor Protein	Protein Coding	O75052	47	GC01P162069	23.5068
CP	Ceruloplasmin	Protein Coding	P00450	57	GC03M149162	23.3542
SNCA	Synuclein Alpha	Protein Coding	P37840	60	GC04M089724	23.1262
VEGFA	Vascular Endothelial Growth Factor A	Protein Coding	P15692	57	GC06P043770	22.9054
CALM1	Calmodulin 1	Protein Coding	P0DP23	54	GC14P090396	22.8209
OXSR1	Oxidative Stress Responsive Kinase 1	Protein Coding	O95747	48	GC03P038298	22.818
BDNF	Brain Derived Neurotrophic Factor	Protein Coding	P23560	58	GC11M027654	22.7065
SOD3	Superoxide Dismutase 3	Protein Coding	P08294	52	GC04P025034	22.5947
CYP1A1	Cytochrome P450 Family 1 Subfamily A Member 1	Protein Coding	P04798	56	GC15M074719	22.4265
HSPA1A	Heat Shock Protein Family A (Hsp70) Member 1A	Protein Coding	P0DMV8	55	GC06P134838	22.377
MAOA	Monoamine Oxidase A	Protein Coding	P21397	58	GC0XP043654	22.3442
GSTT1	Glutathione S-Transferase Theta 1	Protein Coding	P30711	41	GC22Mi00270	22.2345
APEX1	Apurinic/Apyrimidinic Endodeoxyribonuclease 1	Protein Coding	P27695	54	GC14P020455	22.2184
MAPK9	Mitogen-Activated Protein Kinase 9	Protein Coding	P45984	57	GC05M180309	22.123
MAPT	Microtubule Associated Protein Tau	Protein Coding	P10636	59	GC17P045894	22.0961
MTFMT	Mitochondrial Methionyl-TRNA Formyltransferase	Protein Coding	Q96DP5	48	GC15M065001	22.0933
VWF	Von Willebrand Factor	Protein Coding	P04275	56	GC12M029229	21.6357
CYBB	Cytochrome B-245 Beta Chain	Protein Coding	P04839	58	GC0XP037780	21.4861
ATF6	Activating Transcription Factor 6	Protein Coding	P18850	57	GC01P161766	21.4753
CAV1	Caveolin 1	Protein Coding	Q03135	57	GC07P116524	21.4749
NUDT1	Nudix Hydrolase 1	Protein Coding	P36639	51	GC07P002242	21.4047
ATM	ATM Serine/Threonine Kinase	Protein Coding	Q13315	61	GC11P108223	21.4013
CYP3A4	Cytochrome P450 Family 3 Subfamily A Member 4	Protein Coding	P08684	56	GC07M100029	21.3947
HBG2	Hemoglobin Subunit Gamma 2	Protein Coding	P69892	50	GC11M012035	21.3361
CPT1A	Carnitine Palmitoyltransferase 1A	Protein Coding	P50416	57	GC11M068754	21.3041
CYP2E1	Cytochrome P450 Family 2 Subfamily E Member 1	Protein Coding	P05181	55	GC10P133520	21.2691
RYR1	Ryanodine Receptor 1	Protein Coding	P21817	56	GC19P113006	21.2377
PRDX6	Peroxiredoxin 6	Protein Coding	P30041	54	GC01P173477	21.2241
MTOR	Mechanistic Target Of Rapamycin Kinase	Protein Coding	P42345	64	GC01M011106	21.2215
ACADS	Acyl-CoA Dehydrogenase Short Chain	Protein Coding	P16219	52	GC12P133242	21.2128
KNG1	Kininogen 1	Protein Coding	P01042	56	GC03P186717	21.1493
MAPK3	Mitogen-Activated Protein Kinase 3	Protein Coding	P27361	58	GC16M044057	21.0873
PPARGC1A	PPARG Coactivator 1 Alpha	Protein Coding	Q9UBK2	55	GC04M023755	21.0418
FOS	Fos Proto-Oncogene, AP-1 Transcription Factor Subunit	Protein Coding	P01100	59	GC14P075278	20.8781
NR3C1	Nuclear Receptor Subfamily 3 Group C Member 1	Protein Coding	P04150	58	GC05M143277	20.873
NDUFS4	NADH:Ubiquinone Oxidoreductase Subunit S4	Protein Coding	O43181	51	GC05P053560	20.8595
G3BP1	G3BP Stress Granule Assembly Factor 1	Protein Coding	Q13283	49	GC05P151771	20.7986
ERN1	Endoplasmic Reticulum To Nucleus Signaling 1	Protein Coding	O75460	56	GC17M064039	20.7262
PPARG	Peroxisome Proliferator Activated Receptor Gamma	Protein Coding	P37231	61	GC03P012287	20.6873
PNPT1	Polyribonucleotide Nucleotidyltransferase 1	Protein Coding	Q8TCS8	52	GC02M055634	20.6468
PRDX1	Peroxiredoxin 1	Protein Coding	Q06830	58	GC01M045753	20.6344
ABL1	ABL Proto-Oncogene 1, Non-Receptor Tyrosine Kinase	Protein Coding	P00519	61	GC09P130713	20.6295
UCP2	Uncoupling Protein 2	Protein Coding	P55851	55	GC11M073974	20.498
PRDX3	Peroxiredoxin 3	Protein Coding	P30048	51	GC10M119167	20.1619
SHC1	SHC Adaptor Protein 1	Protein Coding	P29353	53	GC01M154962	20.1349
IL10	Interleukin 10	Protein Coding	P22301	56	GC01M206767	20.1335
COX5A	Cytochrome C Oxidase Subunit 5A	Protein Coding	P20674	53	GC15M074919	20.0927
ACAD9	Acyl-CoA Dehydrogenase Family Member 9	Protein Coding	Q9H845	52	GC03P139001	20.0866

## Sheet: Table S6 lipid metabolism>20
Gene Symbol	Description	Category	Uniprot ID	Gifts	GC Id	Relevance score
APOB	Apolipoprotein B	Protein Coding	P04114	55	GC02M020956	172.197
LPL	Lipoprotein Lipase	Protein Coding	P06858	59	GC08P019901	65.0457
LIPC	Lipase C, Hepatic Type	Protein Coding	P11150	54	GC15P058410	56.0496
LDLR	Low Density Lipoprotein Receptor	Protein Coding	P01130	60	GC19P112317	43.8876
USF1	Upstream Transcription Factor 1	Protein Coding	P22415	53	GC01M161039	39.779
APOE	Apolipoprotein E	Protein Coding	P02649	59	GC19P113251	35.4677
APOA5	Apolipoprotein A5	Protein Coding	Q6Q788	52	GC11M116789	25.8337
APOA1	Apolipoprotein A1	Protein Coding	P02647	59	GC11M116835	23.3986
PCSK9	Proprotein Convertase Subtilisin/Kexin Type 9	Protein Coding	Q8NBP7	59	GC01P055039	20.8904
APOA2	Apolipoprotein A2	Protein Coding	P02652	53	GC01M161222	20.1997
CETP	Cholesteryl Ester Transfer Protein	Protein Coding	P11597	55	GC16P056961	19.7123
APOC2	Apolipoprotein C2	Protein Coding	P02655	52	GC19P113254	19.1351
HMGCR	3-Hydroxy-3-Methylglutaryl-CoA Reductase	Protein Coding	P04035	56	GC05P075336	17.2456
INS	Insulin	Protein Coding	P01308	56	GC11M002159	15.9632
APOA4	Apolipoprotein A4	Protein Coding	P06727	50	GC11M116820	15.684
APOC3	Apolipoprotein C3	Protein Coding	P02656	54	GC11P116829	15.5671
LCAT	Lecithin-Cholesterol Acyltransferase	Protein Coding	P04180	56	GC16M067939	15.0281
LDLRAP1	Low Density Lipoprotein Receptor Adaptor Protein 1	Protein Coding	Q5SW96	49	GC01P025543	14.6841
ABCA1	ATP Binding Cassette Subfamily A Member 1	Protein Coding	O95477	58	GC09M104781	13.9772
MTTP	Microsomal Triglyceride Transfer Protein	Protein Coding	P55157	53	GC04P099563	13.7836
PLTP	Phospholipid Transfer Protein	Protein Coding	P55058	53	GC20M045898	13.6007
G6PC1	Glucose-6-Phosphatase Catalytic Subunit 1	Protein Coding	P35575	52	GC17P113706	13.4103
GPIHBP1	Glycosylphosphatidylinositol Anchored High Density Lipoprotein Binding Protein 1	Protein Coding	Q8IV16	45	GC08P143213	13.2387
NPHS2	NPHS2 Stomatin Family Member, Podocin	Protein Coding	Q9NP85	51	GC01M179554	13.1637
LPA	Lipoprotein(A)	Protein Coding	P08519	50	GC06M160531	12.6758
COG2	Component Of Oligomeric Golgi Complex 2	Protein Coding	Q14746	48	GC01P230642	12.3603
LMF1	Lipase Maturation Factor 1	Protein Coding	Q96S06	47	GC16M000853	12.3514
ANGPTL3	Angiopoietin Like 3	Protein Coding	Q9Y5C1	56	GC01P062597	12.28
PPARA	Peroxisome Proliferator Activated Receptor Alpha	Protein Coding	Q07869	53	GC22P046150	12.191
GHR	Growth Hormone Receptor	Protein Coding	P10912	55	GC05P042429	11.53
ADIPOQ	Adiponectin, C1Q And Collagen Domain Containing	Protein Coding	Q15848	55	GC03P186842	11.2062
PON1	Paraoxonase 1	Protein Coding	P27169	56	GC07M095297	10.8413
ALB	Albumin	Protein Coding	P02768	58	GC04P073397	10.604
SLC37A4	Solute Carrier Family 37 Member 4	Protein Coding	O43826	51	GC11M126542	10.5505
NPHS1	NPHS1 Adhesion Molecule, Nephrin	Protein Coding	O60500	55	GC19M035825	10.5425
ANGPTL4	Angiopoietin Like 4	Protein Coding	Q9BY76	53	GC19P008363	10.3938
ABCG8	ATP Binding Cassette Subfamily G Member 8	Protein Coding	Q9H221	50	GC02P043828	10.3558
LIPE	Lipase E, Hormone Sensitive Type	Protein Coding	Q05469	55	GC19M042401	10.3304

## Sheet: Table S7 PPI
node1	node2	node1_string_id	node2_string_id	neighborhood_on_chromosome	gene_fusion	phylogenetic_cooccurrence	homology	coexpression	experimentally_determined_interaction	database_annotated	automated_textmining	combined_score
ANGPTL3	APOC3	9606.ENSP00000360170	9606.ENSP00000227667	0	0	0	0	0.267	0	0	0.801	0.848
ANGPTL3	APOB	9606.ENSP00000360170	9606.ENSP00000233242	0	0	0	0	0.239	0	0	0.845	0.877
ANGPTL3	PCSK9	9606.ENSP00000360170	9606.ENSP00000303208	0	0	0	0	0.055	0	0	0.77	0.773
APOB	CETP	9606.ENSP00000233242	9606.ENSP00000200676	0	0	0	0	0.083	0	0.75	0.958	0.989
APOB	APOC3	9606.ENSP00000233242	9606.ENSP00000227667	0	0	0	0	0.801	0	0.72	0.996	0.999
APOB	VLDLR	9606.ENSP00000233242	9606.ENSP00000371532	0	0	0	0	0.055	0.069	0.54	0.724	0.873
APOB	ANGPTL3	9606.ENSP00000233242	9606.ENSP00000360170	0	0	0	0	0.239	0	0	0.845	0.877
APOB	NPC1L1	9606.ENSP00000233242	9606.ENSP00000289547	0	0	0	0	0.109	0	0	0.895	0.903
APOB	LDLRAP1	9606.ENSP00000233242	9606.ENSP00000363458	0	0	0	0	0	0	0.7	0.764	0.926
APOB	LDLR	9606.ENSP00000233242	9606.ENSP00000454071	0	0	0	0	0.045	0.422	0.9	0.295	0.955
APOB	SORT1	9606.ENSP00000233242	9606.ENSP00000256637	0	0	0	0	0	0	0.9	0.845	0.983
APOB	PCSK9	9606.ENSP00000233242	9606.ENSP00000303208	0	0	0	0	0.162	0	0	0.985	0.987
APOB	MTTP	9606.ENSP00000233242	9606.ENSP00000427679	0	0	0	0	0.62	0.622	0.75	0.999	0.999
APOB	LPA	9606.ENSP00000233242	9606.ENSP00000321334	0	0	0	0	0.372	0.063	0.72	0.999	0.999
APOC3	CETP	9606.ENSP00000227667	9606.ENSP00000200676	0	0	0	0	0.058	0	0.72	0.921	0.977
APOC3	PCSK9	9606.ENSP00000227667	9606.ENSP00000303208	0	0	0	0	0.169	0	0	0.693	0.734
APOC3	VLDLR	9606.ENSP00000227667	9606.ENSP00000371532	0	0	0	0	0.049	0	0.54	0.507	0.765
APOC3	MTTP	9606.ENSP00000227667	9606.ENSP00000427679	0	0	0	0	0.455	0	0	0.646	0.799
APOC3	ANGPTL3	9606.ENSP00000227667	9606.ENSP00000360170	0	0	0	0	0.267	0	0	0.801	0.848
APOC3	LPA	9606.ENSP00000227667	9606.ENSP00000321334	0	0	0	0	0.264	0	0.72	0.811	0.957
APOC3	APOB	9606.ENSP00000227667	9606.ENSP00000233242	0	0	0	0	0.801	0	0.72	0.996	0.999
CETP	PCSK9	9606.ENSP00000200676	9606.ENSP00000303208	0	0	0	0	0	0	0	0.782	0.782
CETP	NPC1L1	9606.ENSP00000200676	9606.ENSP00000289547	0	0	0	0	0.044	0	0	0.787	0.787
CETP	VLDLR	9606.ENSP00000200676	9606.ENSP00000371532	0	0	0	0	0.067	0	0.54	0.777	0.895
CETP	LPA	9606.ENSP00000200676	9606.ENSP00000321334	0	0	0	0	0.224	0	0.72	0.713	0.932
CETP	APOC3	9606.ENSP00000200676	9606.ENSP00000227667	0	0	0	0	0.058	0	0.72	0.921	0.977
CETP	APOB	9606.ENSP00000200676	9606.ENSP00000233242	0	0	0	0	0.083	0	0.75	0.958	0.989
LDLR	APOB	9606.ENSP00000454071	9606.ENSP00000233242	0	0	0	0	0.045	0.422	0.9	0.295	0.955
LDLR	PCSK9	9606.ENSP00000454071	9606.ENSP00000303208	0	0	0	0	0.098	0.982	0.9	0.59	0.999
LDLR	LDLRAP1	9606.ENSP00000454071	9606.ENSP00000363458	0	0	0	0	0	0.822	0.9	0.664	0.993
LDLRAP1	APOB	9606.ENSP00000363458	9606.ENSP00000233242	0	0	0	0	0	0	0.7	0.764	0.926
LDLRAP1	PCSK9	9606.ENSP00000363458	9606.ENSP00000303208	0	0	0	0	0	0	0	0.808	0.808
LDLRAP1	LDLR	9606.ENSP00000363458	9606.ENSP00000454071	0	0	0	0	0	0.822	0.9	0.664	0.993
LPA	CETP	9606.ENSP00000321334	9606.ENSP00000200676	0	0	0	0	0.224	0	0.72	0.713	0.932
LPA	APOC3	9606.ENSP00000321334	9606.ENSP00000227667	0	0	0	0	0.264	0	0.72	0.811	0.957
LPA	APOB	9606.ENSP00000321334	9606.ENSP00000233242	0	0	0	0	0.372	0.063	0.72	0.999	0.999
LPA	PCSK9	9606.ENSP00000321334	9606.ENSP00000303208	0	0	0	0	0.084	0	0	0.697	0.71
LPA	MTTP	9606.ENSP00000321334	9606.ENSP00000427679	0	0	0	0	0.145	0	0	0.727	0.756
MTTP	APOC3	9606.ENSP00000427679	9606.ENSP00000227667	0	0	0	0	0.455	0	0	0.646	0.799
MTTP	APOB	9606.ENSP00000427679	9606.ENSP00000233242	0	0	0	0	0.62	0.622	0.75	0.999	0.999
MTTP	PCSK9	9606.ENSP00000427679	9606.ENSP00000303208	0	0	0	0	0.137	0	0	0.67	0.703
MTTP	LPA	9606.ENSP00000427679	9606.ENSP00000321334	0	0	0	0	0.145	0	0	0.727	0.756
NPC1L1	CETP	9606.ENSP00000289547	9606.ENSP00000200676	0	0	0	0	0.044	0	0	0.787	0.787
NPC1L1	APOB	9606.ENSP00000289547	9606.ENSP00000233242	0	0	0	0	0.109	0	0	0.895	0.903
NPC1L1	PCSK9	9606.ENSP00000289547	9606.ENSP00000303208	0	0	0	0	0.042	0	0	0.722	0.723
PCSK9	CETP	9606.ENSP00000303208	9606.ENSP00000200676	0	0	0	0	0	0	0	0.782	0.782
PCSK9	APOC3	9606.ENSP00000303208	9606.ENSP00000227667	0	0	0	0	0.169	0	0	0.693	0.734
PCSK9	APOB	9606.ENSP00000303208	9606.ENSP00000233242	0	0	0	0	0.162	0	0	0.985	0.987
PCSK9	SORT1	9606.ENSP00000303208	9606.ENSP00000256637	0	0	0	0	0	0	0	0.866	0.866
PCSK9	NPC1L1	9606.ENSP00000303208	9606.ENSP00000289547	0	0	0	0	0.042	0	0	0.722	0.723
PCSK9	MTTP	9606.ENSP00000303208	9606.ENSP00000427679	0	0	0	0	0.137	0	0	0.67	0.703
PCSK9	LPA	9606.ENSP00000303208	9606.ENSP00000321334	0	0	0	0	0.084	0	0	0.697	0.71
PCSK9	ANGPTL3	9606.ENSP00000303208	9606.ENSP00000360170	0	0	0	0	0.055	0	0	0.77	0.773
PCSK9	LDLRAP1	9606.ENSP00000303208	9606.ENSP00000363458	0	0	0	0	0	0	0	0.808	0.808
PCSK9	VLDLR	9606.ENSP00000303208	9606.ENSP00000371532	0	0	0	0	0.045	0	0.9	0.749	0.973
PCSK9	LDLR	9606.ENSP00000303208	9606.ENSP00000454071	0	0	0	0	0.098	0.982	0.9	0.59	0.999
SORT1	APOB	9606.ENSP00000256637	9606.ENSP00000233242	0	0	0	0	0	0	0.9	0.845	0.983
SORT1	PCSK9	9606.ENSP00000256637	9606.ENSP00000303208	0	0	0	0	0	0	0	0.866	0.866
VLDLR	CETP	9606.ENSP00000371532	9606.ENSP00000200676	0	0	0	0	0.067	0	0.54	0.777	0.895
VLDLR	APOC3	9606.ENSP00000371532	9606.ENSP00000227667	0	0	0	0	0.049	0	0.54	0.507	0.765
VLDLR	APOB	9606.ENSP00000371532	9606.ENSP00000233242	0	0	0	0	0.055	0.069	0.54	0.724	0.873
VLDLR	PCSK9	9606.ENSP00000371532	9606.ENSP00000303208	0	0	0	0	0.045	0	0.9	0.749	0.973

## Sheet: Table S8 protein-disease net
term ID	term description	observed gene count	background gene count	strength	false discovery rate	matching proteins in disease network (labels)
DOID:3146	Lipid metabolism disorder	7	72	2.17	9.78e-11	CETP,APOB,PCSK9,ANGPTL3,LDLRAP1,MTTP,LDLR
DOID:13810	Familial hypercholesterolemia	4	5	3.08	3.29e-08	APOB,PCSK9,LDLRAP1,LDLR
DOID:1386	Abetalipoproteinemia	4	5	3.08	3.29e-08	APOB,PCSK9,ANGPTL3,MTTP
DOID:1936	Atherosclerosis	4	21	2.46	1.09e-06	CETP,APOB,LPA,LDLRAP1
DOID:11342	Arcus senilis	3	3	3.18	2.29e-06	APOB,PCSK9,LDLRAP1
DOID:0050828	Artery disease	5	130	1.77	7.19e-06	CETP,APOB,PCSK9,LPA,LDLRAP1
DOID:1390	Hypobetalipoproteinemia	3	6	2.88	7.19e-06	APOB,ANGPTL3,MTTP
DOID:655	Inherited metabolic disorder	8	949	1.11	1.1e-05	CETP,APOB,PCSK9,ANGPTL3,LDLRAP1,TM6SF2,MTTP,LDLR
DOID:5844	Myocardial infarction	3	27	2.23	0.00026	APOB,PCSK9,LPA
DOID:0090105	Autosomal recessive hypercholesterolemia	2	3	3	0.001	PCSK9,LDLRAP1
DOID:0090019	Sitosterolemia	2	4	2.88	0.0015	NPC1L1,LDLRAP1
DOID:630	Genetic disease	10	3778	0.6	0.0025	CETP,APOB,NPC1L1,PCSK9,ANGPTL3,LDLRAP1,VLDLR,TM6SF2,MTTP,LDLR
DOID:9799	Eye degenerative disease	4	236	1.41	0.0029	CETP,APOB,PCSK9,LDLRAP1
DOID:0050737	Autosomal recessive disease	7	1785	0.77	0.0102	APOB,NPC1L1,PCSK9,ANGPTL3,LDLRAP1,VLDLR,MTTP
DOID:0050739	Autosomal genetic disease	8	2802	0.64	0.0204	CETP,APOB,NPC1L1,PCSK9,ANGPTL3,LDLRAP1,VLDLR,MTTP

## Sheet: Table S9 protein-protein MR
id.exposure	id.outcome	outcome	exposure	method	nsnp	b	se	pval	pve
A0A669KAY4	Q7Z7Q0	APOB	PCSK9	MR Egger	13	0.264975	0.121559	0.0518834	0.0432864
A0A669KAY4	Q7Z7Q0	APOB	PCSK9	Weighted median	13	0.225611	0.0398322	1.47855e-08	0.0432864
A0A669KAY4	Q7Z7Q0	APOB	PCSK9	Inverse variance weighted	13	0.207254	0.0786594	0.00841815	0.0432864
A0A669KAY4	Q7Z7Q0	APOB	PCSK9	Simple mode	13	0.216071	0.0566636	0.00246968	0.0432864
A0A669KAY4	Q7Z7Q0	APOB	PCSK9	Weighted mode	13	0.22686	0.0347803	2.84069e-05	0.0432864
Protein	UniProt ID	SNP	Effect allele	OR (95% CI)	P value	PVE
PCSK9	A0A669KAY4	rs11591147	T	1.23 (1.05, 1.44)	8.42e-03	4.33%
PCSK9	A0A669KAY4	rs472495	T	1.23 (1.05, 1.44)	8.42e-03	4.33%
PCSK9	A0A669KAY4	rs11206517	G	1.23 (1.05, 1.44)	8.42e-03	4.33%
PCSK9	A0A669KAY4	rs139110774	A	1.23 (1.05, 1.44)	8.42e-03	4.33%
PCSK9	A0A669KAY4	rs147720706	T	1.23 (1.05, 1.44)	8.42e-03	4.33%
PCSK9	A0A669KAY4	rs80098465	A	1.23 (1.05, 1.44)	8.42e-03	4.33%
PCSK9	A0A669KAY4	rs3999089	G	1.23 (1.05, 1.44)	8.42e-03	4.33%
PCSK9	A0A669KAY4	rs174564	G	1.23 (1.05, 1.44)	8.42e-03	4.33%
PCSK9	A0A669KAY4	rs77303550	T	1.23 (1.05, 1.44)	8.42e-03	4.33%
PCSK9	A0A669KAY4	rs112107114	A	1.23 (1.05, 1.44)	8.42e-03	4.33%
PCSK9	A0A669KAY4	rs58542926	TGGAGCTGTATTTGCCTTCCATGGTGCA	1.23 (1.05, 1.44)	8.42e-03	4.33%
PCSK9	A0A669KAY4	rs1367117	A	1.23 (1.05, 1.44)	8.42e-03	4.33%
PCSK9	A0A669KAY4	rs4665972	C	1.23 (1.05, 1.44)	8.42e-03	4.33%
PCSK9	A0A669KAY4	rs28601761	G	1.23 (1.05, 1.44)	8.42e-03	4.33%

## Sheet: Table S10 external validation
Protein	SNP	Effect allele	OR (95% CI)	P value	PVE	F statistics	id.outcome	outcome
APOB	rs563290	G	3.28 (1.78, 6.04)	0.000144	0.0023	69.57	finn-b-E4_HYPERLIPNAS	Hyperlipidaemia, other/unspecified
NCAN	rs2228603	T	1.41 (1.16, 1.71)	0.000473	0.0152	538.71	ukb-b-12651	Diagnoses - secondary ICD10: E78.0 Pure hypercholesterolaemia
NCAN	rs2228603	T	1.01 (1.01, 1.02)	1.7e-08	0.0152	538.71	finn-b-E4_HYPERCHOL	Pure hypercholesterolaemia
PCSK9	rs11591147	T	1.39 (1.25, 1.54)	1e-09	0.039	1679.87	finn-b-E4_HYPERLIPNAS	Hyperlipidaemia, other/unspecified

[truncated: 1 more sheets: Table S11 binding energy]
